# Supplementary material for: Alkoxyamine-cyanoborane adducts: efficient cyanoborane transfer agents
Source: Royal Society of Chemistry journal article supplement (doi:10.1039/c1cc11345c), 2011-01-01
Supplement: c1cc11345c.pdf [file c1cc11345c.pdf]

## SUPPORTING INFORMATION

### A. SYNTHESIS

#### General procedures

Melting points were recorded on an Electrothermal apparatus and are uncorrected. Optical rotations were measured with a Perkin-Elmer 241 MC and 341 polarimeters, and IR spectra (KBr disks) were obtained with FT-IR Bomem MB-120 and FT-IR JASCO-410 spectrophotometers.  $^1\text{H}$  (300 and 500 MHz) and  $^{13}\text{C}$  (75.5 and 125.8 MHz) NMR spectra were recorded on Bruker Avance-300 and Avance-500 spectrometers. The assignments of  $^1\text{H}$  and  $^{13}\text{C}$  signals were confirmed by homonuclear COSY and heteronuclear 2D correlated spectra, respectively. Mass spectra (LSIMS, EIMS, CI, FAB and LSI) were recorded on Kratos MS80-RFA and Micromass AutoSpec-Q mass spectrometers with a resolution of 1,000 or 10,000 (10% valley definition). For the FAB and LSI spectra, ions were produced by a beam of xenon atoms and  $\text{Cs}^+$  ions, respectively, using thioglycerol as matrix and NaI as additive. TLC was performed on aluminium pre-coated sheets (E. Merck Silica Gel 60 F<sub>254</sub>); spots were visualized by UV light, by charring with 10%  $\text{H}_2\text{SO}_4$  in EtOH and by 0.3% ninhydrine in EtOH. Column chromatography was performed using E. Merck Silica Gel 60 (40–63  $\mu\text{m}$ ). Microanalyses were performed at the “Servicio de Microanálisis” of University of Seville and of University Complutense of Madrid.

#### Method for the preparation of (*E*) and (*Z*)-2-chloroacetaldehyde *O*-alkyl oximes **1** and **2**

A mixture of 2-chloroacetaldehyde diethylacetal (2.0 mL, 13.3 mmol), the corresponding *N*-alkoxyamine hydrochloride (13.3 mmol) and water (0.5 mL) was

stirred at 40° C for 24h, and then at rt for 48 h. After that, formation of two layers was observed, which were separated. The one with higher density corresponded to pure oximes **1** and **2**, which were obtained in an *E/Z* ratio of 7:3, as deduced from <sup>1</sup>H-NMR spectra.

**(E)- and (Z)-2-Chloroacetaldehyde O-methyl oxime (1)**

Yield: 1.16 g, 81%; IR  $\nu_{\max}$  3442, 2953, 2921, 1634, 1459, 1381, 1032, 872  $\text{cm}^{-1}$ ; <sup>1</sup>H-NMR (300 MHz, CDCl<sub>3</sub>) *E* isomer:  $\delta$  7.33 (t, 1H,  $J_{\text{H,H}} = 6.4$  Hz, CHCH<sub>2</sub>), 4.03 (d, 2H, CHCH<sub>2</sub>), 3.79 (s, 3H, OCH<sub>3</sub>); *Z* isomer:  $\delta$  6.73 (t, 1H,  $J_{\text{H,H}} = 4.9$  Hz, CHCH<sub>2</sub>), 4.15 (d, 2H, CHCH<sub>2</sub>), 3.83 (s, 3H, CH<sub>3</sub>); <sup>13</sup>C-NMR (75.5 MHz, CDCl<sub>3</sub>) *E* isomer:  $\delta$  145.1 (=CH), 61.9 (OCH<sub>3</sub>), 39.9 (CH<sub>2</sub>Cl); *Z* isomer:  $\delta$  146.3 (=CH), 62.2 (OMe), 35.0 (CH<sub>2</sub>Cl). NMR data of **1** are in agreement with reported values in literature.<sup>1</sup>

**(E)- and (Z)-2-Chloroacetaldehyde O-benzyl oxime (2)**

Yield: 2.06 g, 84%; IR  $\nu_{\max}$  3426, 3033, 2932, 2876, 1623, 1445, 1367, 1251, 920, 855, 742  $\text{cm}^{-1}$ ; <sup>1</sup>H-NMR (300 MHz, CDCl<sub>3</sub>) *E* isomer:  $\delta$  7.41 (t, 1H,  $J_{\text{H,H}} = 6.4$  Hz, CHCH<sub>2</sub>), 7.32-7.21 (m, 5H, Ar-H), 5.02 (s, 2H, PhCH<sub>2</sub>), 4.02 (d, 2H, CHCH<sub>2</sub>); *Z* isomer:  $\delta$  6.78 (t, 1H,  $J_{\text{H,H}} = 4.9$  Hz, CHCH<sub>2</sub>), 7.26 (m, 5H, Ar-H), 5.07 (s, 2H, PhCH<sub>2</sub>), 4.18 (d, 2H, CHCH<sub>2</sub>); <sup>13</sup>C-NMR (75.5 MHz, CDCl<sub>3</sub>) *E* isomer:  $\delta$  145.9 (=CH), 137.1, 128.7, 128.5, 128.3 (Ar-C), 76.6 (PhCH<sub>2</sub>), 40.2 (CH<sub>2</sub>Cl); *Z* isomer:  $\delta$  147.2 (=CH), 137.3, 128.7, 128.5, 128.3 (Ar-C), 76.8 (PhCH<sub>2</sub>), 35.5 (CH<sub>2</sub>Cl); HREI-MS *m/z* calcd for C<sub>9</sub>H<sub>10</sub>NOCl, (M<sup>+</sup>): 183.0451, found: 183.0451.

---

1 G. B. Jones, C. J. Moody, A. Padwa, and J. M. Kassir, *J. Chem. Soc., Perkin Trans I*, 1991, 1721-1727.

### **(E)- and (Z)-2-Bromoacetaldehyde-O-benzyloxime (3)**

A mixture of benzyloxyamine hydrochloride (1.03 g, 6.44 mmol), NaHCO<sub>3</sub> (596 mg, 7.09 mmol) and water (20 mL) was stirred at room temperature until no CO<sub>2</sub> bubbling was observed. Then, the mixture was extracted with CH<sub>2</sub>Cl<sub>2</sub> (2 x 15 mL). The organic layer was washed with water (2 x 10 mL), dried (MgSO<sub>4</sub>) and concentrated to dryness. To the colourless liquid residue 2 M H<sub>2</sub>SO<sub>4</sub> (1.61 mL, 3.22 mmol) and 2-bromoacetaldehyde diethylacetal (1.00 mL, 6.44 mmol) were added and the mixture was stirred at 40° C for 24 h, and at room temperature for 48 h. After that, formation of two layers was observed and separated. The one with higher density corresponded to pure oxime **3**, which was obtained in an *E/Z* ratio of 7:3, as deduced from its <sup>1</sup>H-NMR spectrum. Yield 1.1 g, 74%; IR  $\nu_{\max}$  3445, 3031, 2927, 1611, 1496, 1455, 1367, 1208, 855, 736, 698 cm<sup>-1</sup>; <sup>1</sup>H-NMR (300 MHz, CDCl<sub>3</sub>) *E* isomer:  $\delta$  7.54 (t, 1H,  $J_{\text{H,H}} = 6.8$  Hz, CHCH<sub>2</sub>), 7.35 (m, 5H, Ar-H), 5.10 (s, 2H, PhCH<sub>2</sub>), 3.96 (d, 2H, CHCH<sub>2</sub>); *Z* isomer:  $\delta$  7.35 (m, 5H, Ar-H), 6.96 (t, 1H,  $J_{\text{H,H}} = 6.0$  Hz, CHCH<sub>2</sub>), 5.17 (s, 2H, PhCH<sub>2</sub>), 4.04 (d, 2H, CHCH<sub>2</sub>); <sup>13</sup>C-NMR (75.5 MHz, CDCl<sub>3</sub>) *E* isomer:  $\delta$  146.0 (=CH), 128.6, 128.4, 128.3, 128.2 (Ar-C), 76.6 (PhCH<sub>2</sub>), 26.6 (CH<sub>2</sub>Br); *Z* isomer:  $\delta$  137.1 (=CH), 128.6, 128.4, 128.3, 128.2 (Ar-C), 76.7 (PhCH<sub>2</sub>), 19.8 (CH<sub>2</sub>Br); HREI-MS *m/z* calcd for C<sub>9</sub>H<sub>10</sub>NOBr, (M<sup>+</sup>): 226.9946, found: 226.9957.

### **General method for the reduction of the 2-haloacetaldehyde O-alkyl oximes 1–3**

The oxime (10.0 mmol) was dissolved in glacial acetic acid (5.0 mL), NaBH<sub>3</sub>CN (1.283 mg, 22.0 mmol) was slowly added, at 0° C, and the mixture was stirred for 2 days at room temperature. After removing acetic acid, co-evaporating with ethanol, the residue

was dissolved in EtOAc and washed with water. The organic layer was dried (MgSO<sub>4</sub>) and concentrated to dryness, and the colourless syrupy residues were purified by column chromatography (hexane→1:2 EtOAc–hexane).

**(±)-2-Chloro-*N*-methoxyethanamine cyanoborane (6)**

Reduction of **1** gave **6**. Yield: 430 mg, 29%; mp 61–64 °C (from EtOAc–hexane);  $R_F$  0.51 (1:1 EtOAc–hexane); IR  $\nu_{\max}$  3034, 2835, 2462, 2427, 2345, 2211, 1434, 1303, 1116, 1023, 945, 668 cm<sup>-1</sup>; <sup>1</sup>H-NMR (300 MHz, CDCl<sub>3</sub>)  $\delta$  7.48 (m, 1H, NH), 3.94 (ddd, 1H,  $J_{2a,2b} = 11.9$  Hz,  $J_{1a,2a} = 5.1$  Hz,  $J_{1b,2a} = 9.3$  Hz, H-2a), 3.87 (s, 3H, Me), 3.76 (ddd, 1H,  $J_{2a,2b} = 11.9$ ,  $J_{1b,2b} = 3.9$  Hz,  $J_{1a,2b} = 5.5$  Hz, H-2b), 3.60 (dddd, 1H,  $J_{1a,1b} = 14.3$  Hz,  $J_{1b,2a} = 9.3$  Hz,  $J_{1b,2b} = 3.9$  Hz,  $J_{1b,NH} = 9.0$  Hz, H-1b), 3.44 (dddd, 1H,  $J_{1a,2a} = 5.1$  Hz,  $J_{1a,2b} = 5.5$  Hz,  $J_{1a,1b} = 14.3$  Hz,  $J_{1a,NH} = 3.2$  Hz, H1a), 1.85 (m, 2H, BH<sub>2</sub>CN); <sup>13</sup>C-NMR (75.5 MHz, CDCl<sub>3</sub>)  $\delta$  60.3 (OCH<sub>3</sub>), 57.0 (NCH<sub>2</sub>), 38.3 (CH<sub>2</sub>Cl); <sup>11</sup>B-NMR (96 MHz, DMSO-*d*<sub>6</sub>)  $\delta$  -21.0 (br t,  $J_{B,H} = 95$  Hz, BH<sub>2</sub>CN); HRLSI-MS  $m/z$  calcd for C<sub>4</sub>H<sub>11</sub><sup>11</sup>BN<sub>2</sub>OCl, [M + H]<sup>+</sup>: 149.0653, found: 149.0645.

***N*-Benzyloxy-2-chloroethanamine (4), (±)-*N*-benzyloxy-2-chloroethanamine-cyanoborane (7), and (*E*)-*N*-benzyloxy-(2-chloroethyl)formamidine-cyanoborane (9)**

Reduction of **2** gave a mixture of **4**, **7** and **9**, purified by column chromatography. Eluted first was **4**. Yield: 260 mg, 14%;  $R_F = 0.73$  (1:2 EtOAc–hexane); IR  $\nu_{\max}$  3446, 3269, 3031, 2958, 2919, 1634, 1495, 1364, 1006, 742, 698 cm<sup>-1</sup>; <sup>1</sup>H-NMR (300 MHz, CDCl<sub>3</sub>)  $\delta$  7.34 (m, 5H, Ar-H), 5.39 (br s, 1H, NH), 4.73 (s, 2H, PhCH<sub>2</sub>), 3.72 (t, 2H,  $J_{H,H} = 5.7$  Hz, CH<sub>2</sub>Cl), 3.20 (t, 2H, NCH<sub>2</sub>); <sup>13</sup>C-NMR (75.5 MHz, CDCl<sub>3</sub>)  $\delta$  137.8,

128.5, 128.0 (Ar-C), 76.3 (PhCH<sub>2</sub>), 53.4 (NCH<sub>2</sub>), 42.1 (CH<sub>2</sub>Cl); HRLSI-MS *m/z* calcd for C<sub>9</sub>H<sub>12</sub>ClNNaO, [M + Na]<sup>+</sup>: 208.0505, found: 208.0511.

Eluted second was **7**. Yield: 1.057 g, 47%; mp 102–104 °C (from EtOAc–hexane); *R<sub>F</sub>* 0.31 (1:2 EtOAc–hexane); IR *v*<sub>max</sub> 3044, 2902, 2435, 2205, 1477, 1302, 1124, 1092, 987, 941, 746, 696 cm<sup>-1</sup>; <sup>1</sup>H-NMR (300 MHz, CDCl<sub>3</sub>) δ 7.43 (m, 5H, Ar-H), 7.01 (m, 1H, NH), 5.14 and 5.09 (2d, 1H each, *J*<sub>Ha,Hb</sub> = 11.3 Hz, PhCH<sub>2</sub>), 3.86 (m, 1H, H2a), 3.68 (m, 2H, H2b, H1a), 3.43 (m, H1b), 1.85 (m, 2H, BH<sub>2</sub>CN); <sup>13</sup>C-NMR (75.5 MHz, CDCl<sub>3</sub>) δ 132.0, 130.2, 130.0, 129.5 (Ar-C), 74.1 (PhCH<sub>2</sub>), 57.8 (NCH<sub>2</sub>), 38.5 (CH<sub>2</sub>Cl); HRLSI-MS *m/z* calcd for C<sub>10</sub>H<sub>14</sub><sup>11</sup>BN<sub>2</sub>ONaCl, [M + Na]<sup>+</sup>: 247.0785, found: 247.0777.

Eluted third was **9**. Yield: 201 mg, 8%; *R<sub>F</sub>* = 0.22 (1:1 EtOAc–hexane); IR *v*<sub>max</sub> 3359, 3237, 2384, 1672, 1455, 1339, 1008, 746, 699 cm<sup>-1</sup>; <sup>1</sup>H-NMR (300 MHz, CDCl<sub>3</sub>) δ 7.49 (d, 1H, *J*<sub>H,NH</sub> = 16.2 Hz, CHNH), 7.40 (m, 5H, Ar-H), 6.66 (br d, 1H, NH), 4.92 (s, 2H, PhCH<sub>2</sub>), 3.70 (s, 4H, NCH<sub>2</sub>, CH<sub>2</sub>Cl), 2.00 (m, 2H, BH<sub>2</sub>CN); <sup>1</sup>H-NMR (300 MHz, DMSO-*d*<sub>6</sub>) δ 8.38 (br d, 1H, NH), 7.81 (d, 1H, *J*<sub>H,NH</sub> = 15.7 Hz, CH=N), 7.47 (m, 5H, Ar-H), 4.94 (s, 2H, PhCH<sub>2</sub>), 3.97 (t, 2H, *J*<sub>H,H</sub> = 5.1 Hz, CH<sub>2</sub>), 3.82 (t, 2H, CH<sub>2</sub>), 1.80 (m, 2H, BH<sub>2</sub>CN); <sup>13</sup>C-NMR (75.5 MHz, CDCl<sub>3</sub>) δ 155.4 (CH=N), 133.0, 130.3, 129.7, 129.5 (Ar-C), 77.4 (PhCH<sub>2</sub>), 54.4 (NCH<sub>2</sub>), 39.8 (CH<sub>2</sub>Cl); <sup>11</sup>B-NMR (96 MHz, CDCl<sub>3</sub>) δ -22.7 (br t, *J*<sub>B,H</sub> = 112.9 Hz, BH<sub>2</sub>CN); HRCI-MS *m/z* calcd for C<sub>11</sub>H<sub>16</sub><sup>11</sup>BClN<sub>3</sub>O, [M + H]<sup>+</sup>: 252.1075, found: 252.1076.

***N*-Benzyloxy-2-bromoethanamine (5), (±)-*N*-benzyloxy-2-bromoethanamine-cyanoborane (8), and (*E*)-*N*-benzyloxy-(2-bromoethyl)formamidine-cyanoborane (10)**

Reduction of **3** gave a mixture of **5**, **8** and **10**, purified by column chromatography. Eluted first was **5**. Yield: 345 mg, 15%;  $R_F = 0.67$  (1:2 EtOAc–hexane); IR  $\nu_{\max}$  3452, 3033, 2953, 2921, 2859, 1668, 1641, 1451, 1366, 742, 699  $\text{cm}^{-1}$ ;  $^1\text{H-NMR}$  (300 MHz,  $\text{CDCl}_3$ )  $\delta$  7.35 (m, 5H, Ar-H), 5.63 (br s, 1H, NH), 4.77 (s, 2H,  $\text{PhCH}_2$ ), 3.59 (t, 2H,  $J_{\text{H,H}} = 5.9$  Hz,  $\text{CH}_2\text{Br}$ ), 3.25 (t, 2H,  $\text{NCH}_2$ );  $^{13}\text{C-NMR}$  (75.5 MHz,  $\text{CDCl}_3$ )  $\delta$  137.7, 128.6, 128.5 (Ar-C), 76.4 ( $\text{PhCH}_2$ ), 53.3 ( $\text{NCH}_2$ ), 31.1 ( $\text{CH}_2\text{Br}$ ). HRLSI-MS  $m/z$  calcd for  $\text{C}_9\text{H}_{12}\text{BrNNaO}$ ,  $[\text{M} + \text{Na}]^+$ : 252.0000, found: 251.9996.

Eluted second was **8**. Yield: 1.668 g, 62%; mp 95-98 °C (from EtOAc–hexane);  $R_F = 0.38$  (1:2 EtOAc–hexane); IR  $\nu_{\max}$  3425, 3041, 2899, 2830, 2439, 2312, 2203, 1474, 1422, 1278, 1121, 1090, 1005, 984, 931, 746, 696  $\text{cm}^{-1}$ ;  $^1\text{H-NMR}$  (500 MHz,  $\text{CDCl}_3$ )  $\delta$  7.44 (m, 5H, Ar-H), 6.90 (m, 1H, NH), 5.13, 5.10 (2d, 1H each,  $J_{\text{H,H}} = 11.3$  Hz,  $\text{PhCH}_2$ ), 3.74 (ddt, 1H,  $J_{1\text{a},1\text{b}} = 14.0$  Hz,  $J_{1\text{a},\text{NH}} = 8.9$  Hz,  $J_{1\text{a},2\text{a}} = 4.1$  Hz,  $J_{1\text{a},2\text{b}} = 4.2$  Hz, H1a), 3.67 (ddd, 1H,  $J_{2\text{a},2\text{b}} = 11.0$  Hz,  $J_{1\text{b},2\text{a}} = 9.5$  Hz,  $J_{1\text{a},2\text{a}} = 4.1$  Hz, H2a), 3.54 (dt, 1H,  $J_{2\text{a},2\text{b}} = 11.0$  Hz,  $J_{1\text{b},2\text{b}} = 4.3$  Hz,  $J_{1\text{a},2\text{b}} = 4.2$  Hz, H2b), 3.49 (dddd, 1H,  $J_{1\text{a},1\text{b}} = 14.0$  Hz,  $J_{1\text{b},2\text{a}} = 9.5$  Hz,  $J_{1\text{b},2\text{b}} = 4.3$  Hz,  $J_{1\text{b},\text{NH}} = 2.9$  Hz, H1b), 1.85 (br t, 2H,  $J_{\text{B,H}} = 129$  Hz,  $\text{BH}_2\text{CN}$ );  $^{13}\text{C-NMR}$  (75.5 MHz,  $\text{CDCl}_3$ )  $\delta$  132.0, 130.3, 130.1, 129.6 (Ar-C), 74.2 ( $\text{PhCH}_2$ ), 57.8 ( $\text{NCH}_2$ ), 26.6 ( $\text{CH}_2\text{Br}$ ); HRLSI-MS  $m/z$  calcd for  $\text{C}_{10}\text{H}_{14}^{11}\text{BN}_2\text{ONaBr}$ ,  $[\text{M} + \text{Na}]^+$ : 291.0280, found: 291.0281; Anal. calcd for  $\text{C}_{10}\text{H}_{14}\text{BN}_2\text{OBr}$ : C, 44.66; H, 5.25; N, 10.42; found: C, 44.49; H, 5.09; N, 10.52.

Eluted third was **10**. Yield: 177 mg, 6%;  $R_F = 0.73$  (40:1 EtOAc–hexane); IR  $\nu_{\max}$  3444, 2953, 2384, 1671, 1455, 1339, 1266, 1115, 144, 699  $\text{cm}^{-1}$ ;  $^1\text{H-NMR}$  (300 MHz,  $\text{CDCl}_3$ )  $\delta$  7.51 (d, 1H,  $J_{\text{H,NH}} = 15.9$  Hz, CH=N), 7.39 (m, 5H, Ar-H), 6.70 (br d, 1H, NH), 4.91 (s, 2H,  $\text{PhCH}_2$ ), 3.79 (t, 2H,  $J_{\text{H,H}} = 5.6$  Hz,  $\text{NCH}_2$ ), 3.53 (t, 2H,  $\text{CH}_2\text{Br}$ ), 2.10 (m, 2H,  $\text{BH}_2\text{CN}$ );  $^{13}\text{C-NMR}$  (75.5 MHz,  $\text{CDCl}_3$ )  $\delta$  155.1 (CH=N), 133.0, 130.2, 129.7, 129.3 (Ar-C), 77.2 ( $\text{PhCH}_2$ ), 54.0 ( $\text{NCH}_2$ ), 27.3 ( $\text{CH}_2\text{Br}$ ); HRLSI-MS  $m/z$  calcd for  $\text{C}_{11}\text{H}_{15}^{11}\text{BBrN}_3\text{NaO}$ ,  $[\text{M} + \text{Na}]^+$ : 318.0389, found: 318.0382.

**2-Azido-*N*-benzyloxyethanamine (11) and (±) 2-azido-*N*-benzyloxyethanamine-cyanoborane (12)**

A suspension of **7** (250 mg, 1.11 mmol) and  $\text{NaN}_3$  (87 mg, 1.34 mmol) in DMF (3.0 mL) was stirred at rt overnight. Then, the solvent was removed under reduced pressure and the residue was purified by column chromatography (hexane→ 1:2 EtOAc–hexane) to give **11** and **12**. Eluted first was **11**. Yield: 48 mg, 22%;  $R_F = 0.63$  (1:2 EtOAc–hexane); IR  $\nu_{\max}$  2918, 2859, 2103, 1451, 1286, 1014, 742, 694  $\text{cm}^{-1}$ ;  $^1\text{H-RMN}$  (300 MHz,  $\text{CDCl}_3$ )  $\delta$  7.37–7.27 (m, 5H, Ar-H), 5.73 (br s, 1H, NH), 4.72 (s, 2H,  $\text{PhCH}_2$ ), 3.47 (t, 2H,  $J_{\text{H,H}} = 5.6$  Hz,  $\text{CH}_2\text{N}_3$ ), 3.06 (br t, 2H,  $\text{NCH}_2$ );  $^{13}\text{C-RMN}$  (75.5 MHz,  $\text{CDCl}_3$ )  $\delta$  137.8, 128.6, 128.1 (Ar-C), 76.5 ( $\text{PhCH}_2$ ), 51.1 ( $\text{NCH}_2$ ), 48.9 ( $\text{CH}_2\text{N}_3$ ); HRLSI-MS  $m/z$  calcd for  $\text{C}_9\text{H}_{12}\text{N}_4\text{NaO}$ ,  $[\text{M} + \text{Na}]^+$ : 215.0909, found: 215.0916.

Eluted second was **12**. Yield: 137 mg, 53%;  $R_F = 0.34$  (1:2 EtOAc–hexane); IR  $\nu_{\max}$  3385, 3038, 2965, 2895, 2437, 2105, 1450, 1266, 1104, 997, 750, 703  $\text{cm}^{-1}$ ;  $^1\text{H-RMN}$  (300 MHz,  $\text{CDCl}_3$ )  $\delta$  7.51–7.39 (m, 5H, Ar-H), 6.87 (br s, 1H, NH), 5.10, 5.07 (2d, 1H each,  $J_{\text{H,H}} = 11.7$  Hz,  $\text{PhCH}_2$ ), 3.75 (ddd, 1H,  $J_{2a,2b} = 13.8$  Hz,  $J_{2a,1b} = 10.1$  Hz,  $J_{2a,1a} =$

4.0 Hz, H-2a), 3.57 (dt, 1H,  $J_{2a,2b} = 13.8$  Hz,  $J_{2b,1a} = J_{2b,1b} = 4.0$  Hz, H-2b), 3.42 (ddt, 1H,  $J_{1a,1b} = 14.0$  Hz,  $J_{2b,NH} = 8.0$  Hz,  $J_{1a,2a} = 4.0$  Hz,  $J_{1a,2b} = 4.0$  Hz, H-1a), 3.21 (m, 1H,  $J_{1b,NH} = 3.9$  Hz, H-1b);  $^{13}\text{C}$ -RMN (75.5 MHz,  $\text{CDCl}_3$ )  $\delta$  132.2, 130.3, 129.9, 129.5 (Ar-C), 73.9 ( $\text{PhCH}_2$ ), 55.3 ( $\text{NCH}_2$ ), 45.8 ( $\text{CH}_2\text{N}_3$ ); HRLSI-MS  $m/z$  calcd for  $\text{C}_{10}\text{H}_{14}^{11}\text{BN}_5\text{NaO}$ ,  $[\text{M} + \text{Na}]^+$ : 254.1189, found: 254.1184.

### **Benzylamine-cyanoborane (18)**

A solution of **7** or **8** (0.37 mmol) and benzylamine (0.37 mmol) in THF (2.0 mL) was kept at rt for 24 h. Then, the solvent was reduced under reduced pressure and the residue was purified by column chromatography (hexane  $\rightarrow$  1:3 EtOAc–hexane) to give **18**. Yield: 34 mg, 63% (from **7**); 50 mg, 93% (from **8**); IR  $\nu_{\text{max}}$  3216, 3131, 3036, 2959, 2413, 2309, 2189, 1603, 1456, 1372, 1296, 1204, 1131, 965, 742, 695  $\text{cm}^{-1}$ ;  $^1\text{H}$ -NMR (300 MHz,  $\text{CD}_3\text{OD}$ )  $\delta$  7.41–7.35 (m, 5H, Ar-H), 6.16 (s, 2H,  $\text{NH}_2$ ), 3.81 (m, 2H,  $\text{PhCH}_2$ ), 1.60 (m, 2H,  $\text{BH}_2\text{CN}$ );  $^{13}\text{C}$ -NMR (75.5 MHz,  $\text{D}_2\text{O}$ )  $\delta$  137.3, 129.8, 129.7, 129.3 (Ar-C), 51.5 ( $\text{PhCH}_2$ ); HREI-MS  $m/z$  calcd for  $\text{C}_8\text{H}_{12}^{11}\text{BN}_2$ ,  $[\text{M} + \text{H}]^+$ : 147.1094, found: 147.1102.

### **1,3,4,6-Tetra-*O*-acetyl-2-amino-2-deoxy- $\beta$ -D-glucopyranose-cyanoborane (19)**

To a 1:1 mixture of  $\text{CH}_2\text{Cl}_2$ –sat. aq.  $\text{NaHCO}_3$  (40 mL) was added 1,3,4,6,-tetra-*O*-acetyl-2-amino-2-deoxy- $\beta$ -D-glucopyranose hydrochloride (150 mg, 0.39 mmol), and the corresponding mixture was vigorously stirred for 30 min. Then, the organic layer was separated, washed with water up to neutral pH, dried over  $\text{MgSO}_4$ , filtered and concentrated to dryness. The residue was dissolved in anhydrous THF (5.0 mL), and to the corresponding solution was added **7** (88 mg, 0.39 mmol); the corresponding mixture



was kept stirring at rt for 24 h. Then, the solvent was removed under reduced pressure, and the residue was purified by column chromatography (hexane → 1:2 EtOAc–hexane) to give **19**. Yield: 86 mg, 57%; mp: 164-166 °C;  $R_F$  = 0.43 (1:2 EtOAc–Hexane); IR  $\nu_{\max}$  3447, 3221, 3107, 2942, 2431, 1750, 1600, 1434, 1372, 1218, 1047, 903  $\text{cm}^{-1}$ ;  $^1\text{H-NMR}$  (300 MHz,  $\text{CDCl}_3$ )  $\delta$  5.88 (d, 1H,  $J_{1,2}$  = 8.6 Hz, H-1), 5.43 (dd, 1H,  $J_{2,3}$  = 10.2 Hz,  $J_{3,4}$  = 9.1 Hz, H-3), 5.33, 5.18 (2m, 2H,  $\text{NH}_2$ ), 5.04 (dd, 1H,  $J_{4,5}$  = 10.0 Hz, H-4), 4.31 (dd, 1H,  $J_{5,6a}$  = 4.3 Hz,  $J_{6a,6b}$  = 12.5 Hz, H-6a), 4.10 (dd, 1H,  $J_{5,6b}$  = 2.0 Hz, H-6b), 3.90 (ddd, 1H, H-5), 3.24 (m, 1H, H-2), (2.21, 2.11, 2.07, 2.03 (4s, 3H each, 4OAc), 1.75 (m, 2H,  $\text{BH}_2\text{CN}$ );  $^{13}\text{C-NMR}$  (75.5 MHz,  $\text{CDCl}_3$ )  $\delta$  171.2, 170.7, 169.7, 169.2 (4  $\text{COCH}_3$ ), 90.4 (C-1), 72.7 (C-5), 70.9 (C-3), 68.2 (C-4), 61.4 (C-6), 57.6 (C-2), 21.1, 21.0, 20.8, 20.7 (4  $\text{COCH}_3$ ); HRLSI-MS  $m/z$  calcd for  $\text{C}_{15}\text{H}_{23}^{11}\text{BN}_2\text{NaO}_9$ ,  $[\text{M} + \text{Na}]^+$ : 409.1394, found: 409.1396; Anal. calcd for  $\text{C}_{15}\text{H}_{23}\text{BN}_2\text{O}_9$ : C, 46.65; H, 6.00; N, 7.25; found: C, 47.06; H, 5.91; N, 7.04.

#### ***N*-Benzyloxy-2-chloro-*N*-( $\beta$ -D-glucopyranosyl)ethanamine (**20**)**

A mixture of **7** (1.1 mmol) and D-glucose (1.1 mmol) in methanol (4.0 mL) and acetic acid (60  $\mu\text{L}$ , 1.1 mmol) was refluxed for 3.5 h. Then, the solvent was removed under reduced pressure and corresponding *N*-glycosides were purified by column chromatography (EtOAc → 20:1 EtOAc:MeOH) to give **20**. Yield: 363 mg, 94%;  $[\alpha]_{\text{D}}^{20}$  –1 ( $c$  1.0, MeOH);  $R_F$  = 0.52 (10:1 EtOAc–MeOH); IR  $\nu_{\max}$  3389, 2942, 2835, 1641, 1451, 1362, 1079, 1028, 748, 701  $\text{cm}^{-1}$ ;  $^1\text{H-NMR}$  (500 MHz,  $\text{CD}_3\text{OD}$ )  $\delta$  7.36 (m, 5H, Ar-H), 4.87, 4.82 (2d, 1H each,  $J_{\text{Ha,Hb}}$  = 10.5 Hz,  $\text{PhCH}_2$ ), 4.16 (d, 1H,  $J_{1,2}$  = 9.0 Hz, H-1), 3.83 (dd, 1H,  $J_{5,6a}$  = 2,3 Hz,  $J_{6a,6b}$  = 12.1 Hz, H-6a), 3.70 (t, 2H,  $J_{\text{H,H}}$  = 6.9 Hz,  $\text{CH}_2\text{Cl}$ ), 3.66 (dd, 1H,  $J_{5,6b}$  = 5,3 Hz, H-6b), 3.51 (t, 1H,  $J_{2,3}$  = 9.0 Hz, H-2), 3.40 (t, 1H,

$J_{3,4} = 8.8$  Hz, H-3), 3.37 (m, 1H, NCHa), 3.30 (t, 1H,  $J_{4,5} = 8.8$  Hz, H-4), 3.28 (m, 1H, NCHb), 3.24 (ddd, 1H, H-5);  $^{13}\text{C-NMR}$  (125.7 MHz,  $\text{CD}_3\text{OD}$ )  $\delta$  136.4, 128.9, 128.0, 127.9 (Ar-C), 93.6 (C-1), 79.2 (C-5), 77.9 (C-3), 76.7 ( $\text{PhCH}_2$ ), 70.2 (C-2), 69.7 (C-4), 61.2 (C-6), 54.6 ( $\text{NCH}_2$ ), 40.9 ( $\text{CH}_2\text{Cl}$ ); HRLSI-MS  $m/z$  calcd for  $\text{C}_{15}\text{H}_{22}\text{NO}_6\text{NaCl}$ ,  $[\text{M} + \text{Na}]^+$ : 370.1033, found: 370.1039.

### ***N*-benzyloxy-2-bromo-*N*-( $\beta$ -D-glucopyranosyl)ethanamine (21)**

A mixture of **8** (1.1 mmol) and D-glucose (1.1 mmol) in methanol (4.0 mL) and acetic acid (60  $\mu\text{L}$ , 1.1 mmol) was refluxed for 3.5 h. Then, the solvent was removed under reduced pressure and the residue was purified by column chromatography (EtOAc  $\rightarrow$  20:1 EtOAc–MeOH) to give **21**: 239 mg, 55%;  $[\alpha]_{\text{D}}^{20} -4$  ( $c$  1.1, MeOH);  $R_{\text{F}} = 0.31$  (10:1 EtOAc–MeOH); IR  $\nu_{\text{max}}$  3387, 2925, 2888, 1572, 1454, 1368, 1080, 1026, 916, 748, 701, 634  $\text{cm}^{-1}$ ;  $^1\text{H-NMR}$  (500 MHz,  $\text{CD}_3\text{OD}$ )  $\delta$  7.38 (m, 5H, Ar-H), 4.90, 4.85 (2d, 1H each,  $J_{\text{Ha,Hb}} = 11.3$  Hz,  $\text{PhCH}_2$ ), 4.20 (d, 1H,  $J_{1,2} = 9.0$  Hz, H-1), 3.86 (dd, 1H,  $J_{5,6a} = 2.0$  Hz,  $J_{6a,6b} = 12.2$  Hz, H-6a), 3.69 (dd, 1H,  $J_{5,6b} = 5.3$  Hz, H-6b), 3.57 (t, 2H,  $J_{\text{H,H}} = 6.8$  Hz,  $\text{CH}_2\text{Br}$ ), 3.53 (t, 1H,  $J_{2,3} = 9.0$  Hz, H-2), 3.44 (m, 1H, NCHa), 3.43 (t, 1H,  $J_{3,4} = 8.5$  Hz, H-3), 3.36 (m, 1H, NCHb), 3.33 (t, 1H,  $J_{4,5} = 9.6$  Hz, H-4), 3.27 (ddd, 1H, H-5);  $^{13}\text{C-NMR}$  (125.7 MHz,  $\text{CD}_3\text{OD}$ )  $\delta$  137.9, 130.4, 129.5, 129.4 (Ar-C), 95.0 (C-1), 79.8 (C-5), 79.3 (C-3), 78.2 ( $\text{PhCH}_2$ ), 71.7 (C-2), 71.2 (C-4), 62.8 (C-6), 56.2 ( $\text{NCH}_2$ ), 30.3 ( $\text{CH}_2\text{Br}$ ); HRLSI-MS  $m/z$  calcd for  $\text{C}_{15}\text{H}_{22}\text{BrNNaO}_6$ ,  $[\text{M} + \text{Na}]^+$ : 414.0528, found: 414.0539.

### 2-Azido-*N*-benzyloxy-*N*-( $\beta$ -D-glucopyranosyl)ethanamine (**22**)

A mixture of **12** (1.1 mmol) and D-glucose (1.1 mmol) in methanol (4.0 mL) and acetic acid (60  $\mu$ L, 1.1 mmol) was refluxed for 3.5 h. Then, the solvent was removed under reduced pressure and the residue was purified by column chromatography (EtOAc  $\rightarrow$  20:1 EtOAc:MeOH) to give **22**: 256 mg, 65%.  $[\alpha]_{\text{D}}^{20}$  0 (*c* 0.4, MeOH);  $R_{\text{F}}$  = 0.31 (10:1 EtOAc–MeOH); IR  $\nu_{\text{max}}$  3382, 2924, 2101, 1569, 1446, 1373, 1273, 1077, 1020, 910, 745, 698  $\text{cm}^{-1}$ ;  $^1\text{H}$ -RMN (500 MHz,  $\text{CD}_3\text{OD}$ )  $\delta$  7.42–7.30 (m, 5H, Ar-H), 4.88, 4.82 (2d, 1H each,  $J_{\text{H,H}}$  = 10.6 Hz,  $\text{PhCH}_2$ ), 4.16 (d, 1H,  $J_{1,2}$  = 9.0 Hz, H-1), 3.83 (dd, 1H,  $J_{6\text{a},6\text{b}}$  = 12.2 Hz,  $J_{5,6\text{a}}$  = 2.2 Hz, H-6a), 3.66 (dd, 1H,  $J_{5,6\text{b}}$  = 5.3 Hz, H-6b), 3.53 (t, 1H,  $J_{2,3}$  = 9.0 Hz, H-2), 3.48 (m, 2H,  $J_{\text{H,H}}$  = 6.2 Hz,  $\text{CH}_2\text{N}_3$ ), 3.40 (t, 1H,  $J_{3,4}$  = 8.9, H-3), 3.32 (m, 1H, H-4), 3.27 (m, 1H, NCHa), 3.26 (m, 1H, H-5), 3.15 (m, 1H, NCHb);  $^{13}\text{C}$ -RMN (125.7 MHz,  $\text{CD}_3\text{OD}$ )  $\delta$  137.9, 130.4, 129.5, 129.4 (Ar-C), 95.0 (C-1), 79.8 (C-5), 79.5 (C-3), 78.1 ( $\text{PhCH}_2$ ) 71.7 (C-2), 71.2 (C-4), 62.7 (C-6), 53.0 ( $\text{NCH}_2$ ), 50.2 ( $\text{CH}_2\text{N}_3$ ); HRCI-MS  $m/z$  calcd for  $\text{C}_{15}\text{H}_{23}\text{N}_4\text{O}_6$ ,  $[\text{M} + \text{H}]^+$ : 355.1618, found: 355.1592.

### 2-Chloro-*N*-benzyloxy-*N*-( $\beta$ -D-xylopyranosyl)ethanamine (**23**)

A mixture of **7** (200 mg, 0.89 mmol) and D-xylose (134 mg, 0.89 mmol) in methanol (4.0 mL) and acetic acid (100  $\mu$ L, 1.75 mmol) was refluxed for 6.0 h. Then, the solvent was removed under reduced pressure and the residue was purified by column chromatography (EtOAc) to give **23**: 198 mg, 70%;  $[\alpha]_{\text{D}}^{23}$  +30 (*c* 1.0, MeOH);  $R_{\text{F}}$  0.27 (EtOAc);  $^1\text{H}$ -RMN (500 MHz,  $\text{CD}_3\text{OD}$ )  $\delta$  7.35 (m, 5H, Ar-H), 4.84, 4.79 (2d, 1H each,  $J_{\text{H,H}}$  = 10.7 Hz,  $\text{PhCH}_2$ ), 4.09 (d, 1H,  $J_{1,2}$  = 9.0 Hz, H-1), 3.86 (dd, 1H,  $J_{4,5\text{a}}$  = 5.4 Hz,  $J_{5\text{a},5\text{b}}$  = 11.2 Hz, H-5a), 3.64 (m, 2H,  $\text{CH}_2\text{Cl}$ ), 3.49 (t, 1H,  $J_{2,3}$  = 9.0 Hz, H-2), 3.47

(m, 1H, H-4), 3.35 (t, 1H,  $J_{3,4} = 9.1$  Hz, H-3), 3.28, 3.19 (2m, 1H each, CH<sub>2</sub>N), 3.17 (m, 1H, H-5b); <sup>13</sup>C-RMN (125 MHz, CD<sub>3</sub>OD) δ 138.3, 130.3, 129.5, 129.4 (Ar-C), 96.1 (C-1), 79.5 (C-3), 78.1 (PhCH<sub>2</sub>), 71.8 (C-2), 71.1 (C-4), 69.0 (C-5), 56.0 (CH<sub>2</sub>Cl), 42.5 (CH<sub>2</sub>N); HPLSI-MS m/z calcd for C<sub>14</sub>H<sub>20</sub>ClNNaO<sub>5</sub>, [M + Na]<sup>+</sup>: 340.0928, found: 340.0937.

**2-Chloro-*N*-benzyloxy-*N*-(β-D-galactopyranosyl)ethanamine (24) and 2-chloro-*N*-benzyloxy-*N*-(β-D-galactofuranosyl)ethanamine (25)**

A mixture of **7** (143 mg, 0.64 mmol) and D-galactose (115 mg, 0.64 mmol) in methanol (5.0 mL) and acetic acid (50 μL, 0.88 mmol) was refluxed for 9.0 h. Then, the solvent was removed under reduced pressure and the residue was purified by column chromatography (EtOAc→20:1 EtOAc–MeOH).

Eluted first was **25**: 19 mg, 9%; R<sub>F</sub> 0.23 (20:1 EtOAc–MeOH);  $[\alpha]_{\text{D}}^{20} +60$  (*c* 0.9, MeOH); <sup>1</sup>H-NMR (500 MHz, CD<sub>3</sub>OD) δ 7.42–7.31 (m, 5H, Ar-H), 4.87, 4.83 (2d, 1H each,  $J_{\text{H,H}} = 10.5$  Hz, PhCH<sub>2</sub>), 4.57 (d, 1H,  $J_{1,2} = 5.9$  Hz, H-1), 4.28 (dd, 1H,  $J_{2,3} = 7.0$  Hz, H-2), 4.13 (dd, 1H,  $J_{3,4} = 8.1$  Hz, H-3), 3.89 (dd, 1H,  $J_{4,5} = 2.1$  Hz, H-4), 3.72–3.61 (m, 5H, H-5, H-6a, H-6b, CH<sub>2</sub>Cl), 3.22 (m, 2H, CH<sub>2</sub>N); <sup>13</sup>C-RMN (75.5 MHz, CD<sub>3</sub>OD) δ 138.3, 130.2, 129.6, 129.3 (Ar-C), 100.1 (C-1), 83.0 (C-4), 78.7 (C-2, PhCH<sub>2</sub>), 77.3 (C-3), 72.1 (C-5), 64.6 (C-6), 56.7 (CH<sub>2</sub>N), 42.3 (CH<sub>2</sub>Cl); HPLSI-MS m/z calcd for C<sub>15</sub>H<sub>23</sub>ClNO<sub>6</sub>, [M + Na]<sup>+</sup>:348.1214, found: 348.1225.

Eluted second was **24**: 115 mg, 52%; R<sub>F</sub> 0.11 (20:1 EtOAc–MeOH);  $[\alpha]_{\text{D}}^{20} -2$  (*c* 0.7, MeOH); IR ν<sub>max</sub> 3340, 2923, 1648, 1444, 1362, 1250, 1041, 741, 702 cm<sup>-1</sup>; <sup>1</sup>H-NMR (500 MHz, CD<sub>3</sub>OD) δ 7.36–7.29 (m, 5H, Ar-H), 4.85, 4.80 (2d, 1H each,  $J_{\text{H,H}} = 10.7$

Hz, PhCH<sub>2</sub>), 4.17 (d, 1H,  $J_{1,2}$  = 9.1 Hz, H-1), 3.84 (dd, 1H,  $J_{3,4}$  = 3.3 Hz,  $J_{4,5}$  = 0.6 Hz, H-4), 3.76 (dd, 1H,  $J_{5,6a}$  = 6.9 Hz,  $J_{6a,6b}$  = 11.5 Hz, H-6a), 3.74 (t, 1H,  $J_{2,3}$  = 9.1 Hz, H-2), 3.68 (dd, 1H,  $J_{5,6b}$  = 5.1 Hz, H-6b), 3.67 (t, 2H,  $J_{H,H}$  = 6.7 Hz, CH<sub>2</sub>-Cl), 3.51 (dd, 1H, H-3), 3.50 (m, 1H, H-5), 3.36, 3.26 (2m, 1H each, CH<sub>2</sub>N); <sup>13</sup>C-RMN (125 MHz, CD<sub>3</sub>OD) δ 138.3, 130.5, 129.6, 129.4 (Ar-C), 95.8 (C-1), 78.6 (PhCH<sub>2</sub>), 77.9 (C-5), 76.3 (C-3), 70.7 (C-4), 69.3 (C-2), 62.9 (C-6), 55.5 (CH<sub>2</sub>N), 42.6 (CH<sub>2</sub>Cl); HRCl-MS m/z calcd for C<sub>15</sub>H<sub>23</sub>ClNO<sub>6</sub>, [M + H]: 348.1214, found: 348.1215.

**2-Chloro-*N*-benzyloxy-*N*-( $\alpha$ -D-mannopyranosyl)ethanamine (26), 2-chloro-*N*-benzyloxy-*N*-( $\beta$ -D-mannopyranosyl)ethanamine (27), and 2-chloro-*N*-benzyloxy-*N*-( $\alpha$ -D-mannofuranosyl)ethanamine (28)**

A mixture of **4** (91 mg, 0.49 mmol) and D-mannose (84 mg, 0.47 mmol) in methanol (4.0 mL) and acetic acid (40  $\mu$ L, 0.70 mmol) was refluxed for 5.0 h. Then, the solvent was removed under reduced pressure and the residue was purified by column chromatography (EtOAc→EtOAc–MeOH 20:1) to afford compounds **26–28** as a non-separable mixture in a 2:1:2 ratio, as deduced from <sup>1</sup>H-NMR data: 130 mg, 76%; R<sub>F</sub> 0.34 (EtOAc–MeOH 10:1); IR  $\nu_{\max}$  3377, 2924, 2362, 1653, 1065, 741, 698 cm<sup>-1</sup>; <sup>1</sup>H-NMR (500 MHz, D<sub>2</sub>O) δ 7.50–7.44 (m, Ar-H), data for **26**: δ 4.94, 4.87 (2d, 1H each,  $J_{H,H}$  = 10.3 Hz, PhCH<sub>2</sub>), 4.39 (d, 1H,  $J_{1,2}$  = 2.3 Hz, H-1), 4.32 (d, 1H,  $J_{2,3}$  = 3.4 Hz, H-2), 3.99 (dd, 1H,  $J_{3,4}$  = 8.8 Hz, H-3), 3.93 (dd, 1H, H-5), 3.88 (dd, 1H,  $J_{5,6a}$  = 2.6 Hz,  $J_{6a,6b}$  = 12.3 Hz, H-6a), 3.87 (t, 2H,  $J_{H,H}$  = 6.5 Hz, CH<sub>2</sub>Cl), 3.74 (dd, 1H,  $J_{5,6b}$  = 6.4 Hz, H-6b), 3.73 (t, 1H,  $J_{4,5}$  = 9.2 Hz, H-4), 3.44 (m, 1H, CH<sub>a</sub>N), 3.11 (m, 1H, CH<sub>b</sub>N); data for **27**: δ 4.95, 4.90 (2d, 1H each,  $J_{H,H}$  = 9.9 Hz, PhCH<sub>2</sub>), 4.38 (d, 1H,  $J_{1,2}$  = 0.9 Hz, H-1), 4.17 (dd, 1H,  $J_{2,3}$  = 2.6 Hz, H-2), 3.94 (dd, 1H,  $J_{5,6a}$  = 2.3 Hz,  $J_{6a,6b}$  = 12.2 Hz, H-6a), 3.84

(m, 2H, CH<sub>2</sub>Cl), 3.78 (dd, 1H,  $J_{5,6b}$ =6.2 Hz, H-6b), 3.63 (m, 2H, H-3, H-4), 3.42 (ddd, 1H,  $J_{4,5}$ =8.7 Hz, H-5). 3.93 (m, 1H, H-3), 3.54 (m, 1H, CH<sub>a</sub>N), 3.32 (m, 1H, CH<sub>b</sub>N); data for **28**:  $\delta$  4.94, 4.90 (2d, 1H each,  $J_{H,H}$ = 10.2 Hz, PhCH<sub>2</sub>), 4.73 (d, 1H,  $J_{1,2}$ = 7.1 Hz, H-1), 4.48 (dd, 1H,  $J_{2,3}$ = 4.3 Hz, H-2), 4.32 (dd, 1H,  $J_{3,4}$ = 2.4 Hz, H-3), 4.00 (dd, 1H,  $J_{4,5}$ = 9.0 Hz, H-4), 3.93 (m, 1H, H-5), 3.81 (dd, 1H,  $J_{5,6a}$ = 2.7 Hz,  $J_{6a,6b}$ = 12.1 Hz, H-6a), 3.64 (dd, 1H,  $J_{5,6a}$ = 5.8 Hz, H-6b), 3.34 (m, 1H, CH<sub>a</sub>N), 3.26 (m, 1H, CH<sub>b</sub>N); <sup>13</sup>C-NMR (125 MHz, D<sub>2</sub>O)  $\delta$  135.7, 135.6, 129.6, 129.4, 128.9, 129.0, 128.9, 128.8 (Ar-C), data for **26**: 92.5 (C-1), 77.3 (PhCH<sub>2</sub>), 75.6 (C-5), 71.1 (C-3), 68.5 (C-2), 67.2 (C-4), 61.2 (C-6), 55.5 (CH<sub>2</sub>N), 41.1 (CH<sub>2</sub>-Cl); data for **27**: 92.0 (C-1), 78.6 (C-5), 77.0 (PhCH<sub>2</sub>), 74.1 (C-3), 69.8 (C-2), 66.9 (C-4), 61.1 (C-6), 55.1 (CH<sub>2</sub>N), 41.3 (CH<sub>2</sub>Cl); data for **28**: 97.8 (C-1), 80.0 (C-4), 77.7 (PhCH<sub>2</sub>), 72.3 (C-2), 71.5 (C-3), 69.0 (C-5), 63.1 (C-6), 55.3 (CH<sub>2</sub>N), 41.3 (CH<sub>2</sub>Cl); HRLSIMS  $m/z$  calcd for C<sub>15</sub>H<sub>22</sub>NO<sub>6</sub>NaCl, [M + Na]<sup>+</sup>: 370.1033, found: 370.1037.

**(E) and (Z)-1,2-O-Isopropylidene- $\alpha$ -D-xylo-pentodialdo-1,4-furanose-5-O-benzyloxime (30)**

To a solution of 1,2-O-isopropylidene- $\alpha$ -D-xylo-pentodialdo-1,4-furanose **29**<sup>2</sup> (235 mg, 1.25 mmol) in pyridine (3 mL) was added benzyloxyamine hydrochloride (240 mg, 1.5 mmol, 1.2 equiv.) and the mixture was kept stirring at rt for 12 h. Then, it was concentrated to dryness and the residue was purified by column chromatography (1:10→1:2 EtOAc–hexane) to give **30** as a 2:1 *E/Z* mixture as deduced from <sup>1</sup>H-NMR: 321 mg, 87%; [ $\alpha$ ]<sub>D</sub><sup>24</sup> –67 (*c* 1.0, CH<sub>2</sub>Cl<sub>2</sub>);  $R_F$  0.5 (1:2 EtOAc–hexane); IR  $\nu_{max}$  3400, 2388, 1783, 1295, 1260, 1162, 1092, 984, 847, 698, 644 cm<sup>-1</sup>; <sup>1</sup>H-RMN (300 MHz, CDCl<sub>3</sub>) *E* isomer:  $\delta$  7.57 (d, 1H,  $J_{4,5}$ = 4.6 Hz, H-5), 7.43–7.27 (m, 5H, Ar-H), 5.98 (d,

<sup>2</sup> R. N. Monrad and R. Madsen, *J. Org. Chem.* 2007, **72**, 9782–9785.

1H,  $J_{1,2} = 3.7$  Hz, H-1), 5.11 (s, 2H, PhCH<sub>2</sub>), 4.69 (dd, 1H,  $J_{3,4} = 2.6$  Hz, H-4), 4.54 (d, 1H,  $J_{2,3} \sim 0$  Hz, H-2), 4.33 (d, 1H, H-3), 1.49, 1.32 (2s, 3H each, C(CH<sub>3</sub>)<sub>2</sub>); *Z* isomer:  $\delta$  6.86 (d, 1H,  $J_{4,5} = 3.1$  Hz, H-5), 5.96 (d, 1H,  $J_{1,2} = 3.7$  Hz, H-1), 5.16, 5.14 (2d, 1H each,  $J_{H,H} = 12.5$  Hz, PhCH<sub>2</sub>), 5.07 (t, 1H,  $J_{3,4} = 3.0$  Hz, H-4), 4.58 (d, 1H, H-3), 4.53 (d, 1H,  $J_{2,3} \sim 0$  Hz, H-2); 1.49, 1.32 (2s, 3H each, C(CH<sub>3</sub>)<sub>2</sub>); <sup>13</sup>C-NMR (75.5 MHz, CDCl<sub>3</sub>)  $\delta$  137.3, 136.9, 128.8, 128.7, 128.5, 128.4, 128.3 (Ar-C); *E* isomer:  $\delta$  146.9 (C-5), 112.1 (C(CH<sub>3</sub>)<sub>2</sub>), 105.1 (C-1), 84.9 (C-2), 77.6 (C-4), 76.6 (PhCH<sub>2</sub>), 76.1 (C-3), 26.9, 26.3 (C(CH<sub>3</sub>)<sub>2</sub>); *Z* isomer:  $\delta$  149.3 (C-5), 112.0 (C(CH<sub>3</sub>)<sub>2</sub>), 104.7 (C-1), 85.1 (C-2), 78.4 (C-4), 76.9 (PhCH<sub>2</sub>), 75.9 (C-3), 27.1, 26.3 (C(CH<sub>3</sub>)<sub>2</sub>); HRLSI-MS *m/z* calcd for C<sub>15</sub>H<sub>19</sub>NNaO<sub>5</sub>, [M + Na]<sup>+</sup>: 316.1161, found: 316.1160.

**5-Benzyloxyamino-5-deoxy-1,2-*O*-isopropylidene- $\alpha$ -D-xylofuranose (31) and *N*-benzyloxy-*N*-(5-deoxy-1,2-*O*-isopropylidene- $\alpha$ -D-xylofuranos-5-yl)amino cyanoborane (32)**

To a solution of (*E*) and (*Z*)-1,2-*O*-isopropylidene- $\alpha$ -D-xylo-pentodialdo-1,4-furanose-5-*O*-benzyloxime (**30**) (295 mg, 1.01 mmol) in AcOH (4 mL) was added NaBH<sub>3</sub>CN (158 mg, 2.51 mmol, 2.5 equiv.) and the corresponding mixture was kept stirring at rt for 21 h. Then, it was concentrated to dryness, and the residue was dissolved in EtOAc (30 mL), washed with water (3 x 30 mL), dried over MgSO<sub>4</sub>, and filtered. The filtrate was concentrated to dryness and purified by column chromatography (hexane→1:1 hexane–EtOAc).

Eluted first was **31**. Yield: 202 mg, 68%;  $[\alpha]_D^{25} +17$  (*c* 1.0, CH<sub>2</sub>Cl<sub>2</sub>); *R<sub>F</sub>* 0.3 (1:2 EtOAc–hexane); IR  $\nu_{\max}$  3384, 2925, 2862, 2355, 2157, 1457, 1379, 1270, 1221, 1078, 1004, 910, 861, 817, 748, 688, 644 cm<sup>-1</sup>; <sup>1</sup>H-NMR (300 MHz, CDCl<sub>3</sub>)  $\delta$  7.36–7.29 (m,

5H, Ar-H), 5.88 (d, 1H,  $J_{1,2} = 3.7$  Hz, H-1), 4.72 (s, 2H, PhCH<sub>2</sub>), 4.50 (d, 1H,  $J_{2,3} \sim 0$  Hz, H-2), 4.29 (m, 1H, H-4), 4.20 (d, 1H,  $J_{3,4} = 2.6$  Hz, H-3), 3.52 (dd, 1H,  $J_{4,5a} = 5.9$  Hz,  $J_{5a,5b} = 13.2$  Hz, H-5a), 3.29 (dd, 1H,  $J_{4,5b} = 3.3$  Hz, H-5b), 1.48, 1.31 (2s, 3H each, C(CH<sub>3</sub>)<sub>2</sub>); <sup>13</sup>C-NMR (75.5 MHz, CDCl<sub>3</sub>) δ 136.8, 128.6, 128.6, 128.3 (Ar-C), 111.6 (C(CH<sub>3</sub>)<sub>2</sub>), 104.7 (C-1), 85.4 (C-2), 78.0 (C-4), 76.6 (C-5), 76.4 (PhCH<sub>2</sub>), 50.1 (C-3), 26.8, 26.1 (C(CH<sub>3</sub>)<sub>2</sub>); HRLSI-MS  $m/z$  calcd for C<sub>15</sub>H<sub>21</sub>NNaO<sub>5</sub>, [M + Na]<sup>+</sup>: 318.1317, found: 318.1334; Anal. calcd for C<sub>15</sub>H<sub>21</sub>NO<sub>5</sub>: C, 61.00; H, 7.17; N, 4.74, found: C, 61.06; H, 7.23; N, 4.60.

Eluted second was **32**. Yield: 74 mg, 22%;  $[\alpha]_D^{24} -67$  (*c* 1.0, CH<sub>2</sub>Cl<sub>2</sub>);  $R_F$  0.2 (1:2 EtOAc–hexane); <sup>1</sup>H-NMR (300 MHz, CDCl<sub>3</sub>) δ 7.43–7.35 (m, 5H, Ar-H), major diastereoisomer: 7.13 (br d, 1H, NH), 5.87 (d, 1H,  $J_{1,2} = 3.5$  Hz, H-1), 5.10, 4.99 (2d, 1H each,  $J_{H,H} = 10.3$  Hz, PhCH<sub>2</sub>), 4.52 (dt, 1H,  $J_{3,4} = 2.6$  Hz,  $J_{4,5b} = 8.7$  Hz, H-4), 4.51 (d, 1H,  $J_{2,3} \sim 0$  Hz, H-2), 4.22 (d, 1H,  $J_{3,4} = 2.6$  Hz, H-3), 3.59 (ddd, 1H,  $J_{5a,5b} = 14.5$  Hz,  $J_{5a,NH} = 9.2$  Hz,  $J_{5a,4} = 3.3$  Hz, H-5a), 3.49 (ddd, 1H,  $J_{5a,5b} = 14.5$  Hz,  $J_{5b,NH} = 2.0$  Hz,  $J_{5b,4} = 8.7$  Hz H-5b), 1.52, 1.32 (2s, 3H each, C(CH<sub>3</sub>)<sub>2</sub>); minor diastereoisomer: 7.20 (br t, 1H, NH), 5.85 (d, 1H,  $J_{1,2} = 3.5$  Hz, H-1), 5.04 (s, 2H, PhCH<sub>2</sub>), 4.49 (d, 1H,  $J_{2,3} \sim 0$  Hz, H-2), 4.33 (td,  $J_{3,4} = 3.0$  Hz,  $J_{4,5a} = J_{4,5b} = 6.5$  Hz, H-4), 4.20 (d, 1H,  $J_{3,4} = 3.0$  Hz, H-3), 3.54 (m, 2H, H-5a, H-5b), 1.46, 1.29 (2s, 3H each, C(CH<sub>3</sub>)<sub>2</sub>); <sup>13</sup>C-NMR (75.5 MHz, CDCl<sub>3</sub>) major diastereoisomer δ 132.4 129.9, 129.8, 129.2 (Ar-C), 112.3 (C(CH<sub>3</sub>)<sub>2</sub>), 104.9 (C-1), 86.0 (C-2), 74.7 (C-3), 74.6 (PhCH<sub>2</sub>), 74.4 (C-4), 56.4 (C-5), 27.1, 26.4 (C(CH<sub>3</sub>)<sub>2</sub>); minor diastereoisomer δ 132.5, 129.7, 129.4, 128.8 (Ar-C), 112.5 (C(CH<sub>3</sub>)<sub>2</sub>), 105.0 (C-1), 85.7 (C-2), 76.8 (C-3), 73.5 (PhCH<sub>2</sub>), 75.7 (C-4), 55.4 (C-5), 27.1, 26.5 (C(CH<sub>3</sub>)<sub>2</sub>); HRLSI-MS  $m/z$  calcd for C<sub>16</sub>H<sub>23</sub>BN<sub>2</sub>NaO<sub>5</sub>, [M + Na]<sup>+</sup>: 357.1598, found: 357.1609.



**5-Benzyloxyamino-5-deoxy-5-*N*-(β-D-glucopyranosyl)-1,2-*O*-isopropylidene-α-D-xylofuranose (33)**

To a solution of 5-benzyloxyamino-5-deoxy-1,2-*O*-isopropylidene-α-D-xylofuranose **31** (128 mg, 0.43 mmol) in MeOH (8 mL) was added D-glucose (71 mg, 0.38 mmol) and AcOH (0.1 mL), and the corresponding mixture was refluxed for 6 h. After that, it was concentrated to dryness, and the residue was purified by column chromatography (EtOAc→5:1 EtOAc–MeOH) to give **33**: 161 mg, 90%;  $[\alpha]_D^{26} -42$  (*c* 1.0, MeOH);  $R_F$  0.20 (5:1 EtOAc–MeOH); IR  $\nu_{max}$  3300, 1685, 1541, 1305, 1240, 1019, 793, 723  $cm^{-1}$ ;  $^1H$ -NMR (300 MHz, CD<sub>3</sub>OD)  $\delta$  7.42–7.31 (m, 5H, Ar-H), 5.92 (d, 1H,  $J_{1,2} = 3.8$  Hz, H-1), 4.86 (s, 2H, PhCH<sub>2</sub>), 4.50 (d, 1H,  $J_{2,3} \sim 0$  Hz, H-2), 4.46 (ddd, 1H,  $J_{3,4} = 2.7$  Hz,  $J_{4,5a} = 5.6$  Hz,  $J_{4,5b} = 7.5$  Hz, H-4), 4.19 (d, 1H,  $J_{1',2'} = 8.9$  Hz, H-1'), 4.06 (d, 1H, H-3), 3.84 (dd, 1H,  $J_{5',6'a} = 2.1$  Hz,  $J_{6'a,6'b} = 12.2$  Hz, H-6'a) 3.67 (dd, 1H,  $J_{5',6'b} = 5.0$  Hz, H-6'b), 3.55 (t, 1H,  $J_{2',3'} = 8.9$  Hz, H-2'), 3.43 (t, 1H,  $J_{3',4'} = 8.9$  Hz, H-3'), 3.32 (dd, 1H,  $J_{5a,5b} = 14.0$  Hz,  $J_{4,5a} = 5.6$  Hz, H-5a), 3.31 (t, 1H,  $J_{4',5'} = 9.0$  Hz, H-4'), 3.27 (m, 1H, H-5'), 3.19 (dd, 1H,  $J_{4,5b} = 7.5$  Hz, H-5b), 1.46, 1.31 (2s, 3H each, C(CH<sub>3</sub>)<sub>2</sub>);  $^{13}C$ -NMR (75.5 MHz, CDCl<sub>3</sub>)  $\delta$  137.8, 130.3, 129.5, 129.4 (Ar-C), 112.6 (C(CH<sub>3</sub>)<sub>2</sub>) 106.3 (C-1), 94.9 (C-1'), 86.7 (C-2), 79.8 (C-4'), 79.5 (C-3'), 79.3 (C-4), 77.9 (PhCH<sub>2</sub>), 76.3 (C-3), 71.9 (C-2'), 71.3 (C-5'), 62.7 (C-6'), 52.5 (C-5), 27.2, 26.4 (C(CH<sub>3</sub>)<sub>2</sub>); HPLSI-MS *m/z* calcd for C<sub>21</sub>H<sub>31</sub>NNaO<sub>10</sub>, [M + Na]<sup>+</sup>: 480.1847, found: 480.1851; Anal. calcd for C<sub>21</sub>H<sub>31</sub>NO<sub>10</sub>: C, 55.13; H, 6.83; N, 3.06, found: C, 55.25; H, 6.87; N, 2.84.

**5-Benzyloxyamino-5-deoxy-5-*N*-(β-D-xylopyranosyl)-1,2-*O*-isopropylidene-α-D-xylofuranose (34)**

To a solution of 5-benzyloxyamino-5-deoxy-1,2-*O*-isopropylidene- $\alpha$ -D-xylofuranose **31** (200 mg, 0.68 mmol) in MeOH (20 mL) was added D-xylose (91 mg, 0.61 mmol) and AcOH (0.2 mL), and the corresponding mixture was refluxed for 6 h. After that, it was concentrated to dryness and the residue was purified by column chromatography (20:1→10:1 CH<sub>2</sub>Cl<sub>2</sub>–MeOH) to give **34**: 221 mg, 85%;  $[\alpha]_D^{25}$  –38 (c 1.1, MeOH);  $R_F$  0.44 (10:1 EtOAc–MeOH); IR  $\nu_{\max}$  3384, 2914, 1444, 1371, 1216, 1061, 1012, 857, 741, 707 cm<sup>-1</sup>; <sup>1</sup>H-NMR (500 MHz, CD<sub>3</sub>OD)  $\delta$  7.39–7.29 (m, 5H, Ar-H), 5.90 (d, 1H,  $J_{1,2}$  = 3.8 Hz, H-1), 4.83 (s, 2H, PhCH<sub>2</sub>), 4.48 (d, 1H,  $J_{2,3}$  ~ 0 Hz, H-2), 4.40 (ddd, 1H,  $J_{3,4}$  = 2.8 Hz,  $J_{4,5a}$  = 5.6 Hz,  $J_{4,5b}$  = 7.5 Hz, H-4), 4.10 (d, 1H,  $J_{1',2'}$  = 9.0 Hz, H-1'), 4.02 (d, 1H, H-3), 3.89 (dd, 1H,  $J_{4',5a'}$  = 5.5 Hz,  $J_{5a',5b'}$  = 11.2 Hz, H-5a'), 3.51 (t, 1H,  $J_{1',2'}$  =  $J_{2',3'}$  = 9.0 Hz, H-2'), 3.47 (ddd, 1H,  $J_{3',4'}$  = 9.1 Hz,  $J_{4',5a'}$  = 5.5 Hz,  $J_{4',5b'}$  = 11.0 Hz, H-4'), 3.36 (t, 1H, H-3'), 3.29 (dd, 1H,  $J_{5a,5b}$  = 13.9 Hz, H-5a), 3.17 (t, 1H, H-5b'), 3.12 (dd, 1H, H-5b), 1.43, 1.29 (2s, 3H each, C(CH<sub>3</sub>)<sub>2</sub>); <sup>13</sup>C-NMR (75.5 MHz, CDCl<sub>3</sub>)  $\delta$  138.3, 130.1, 129.6, 129.3 (Ar-C), 112.7 (C(CH<sub>3</sub>)<sub>2</sub>), 106.4 (C-1), 95.9 (C-1'), 86.8 (C-2), 79.6 (C-4), 77.7 (PhCH<sub>2</sub>), 76.4 (C-3), 76.4 (C-3'), 72.0 (C-2'), 71.3 (C-4'), 69.1 (C-5'), 52.4 (C-5), 27.3, 26.5 (C(CH<sub>3</sub>)<sub>2</sub>); HRLSI-MS  $m/z$  calcd for C<sub>20</sub>H<sub>29</sub>NNaO<sub>9</sub>, [M + Na]<sup>+</sup>; 450.1740, found: 450.1757; Anal. calcd for C<sub>20</sub>H<sub>29</sub>NO<sub>9</sub>: C, 56.20; H, 6.84; N, 3.28, found: C, 56.21; H, 7.16; N, 3.08.

**5-Benzyloxyamino-5-deoxy-5-*N*-( $\beta$ -D-galactopyranosyl)-1,2-*O*-isopropylidene- $\alpha$ -D-xylofuranose (35)**

To a solution of 5-benzyloxyamino-5-deoxy-1,2-*O*-isopropylidene- $\alpha$ -D-xylofuranose **31** (200 mg, 0.68 mmol) in MeOH (20 mL) was added D-galactose (110 mg, 0.61 mmol) and AcOH (0.2 mL), and the corresponding mixture was refluxed for 6 h. After that, it was concentrated to dryness, and the residue was crystallized from ethanol to give **35**:

263 mg, 85%;  $[\alpha]_{\text{D}}^{21} +32$  (*c* 1.0, MeOH);  $R_{\text{F}}$  0.26 (5:1 EtOAc–MeOH); IR  $\nu_{\text{max}}$  3452, 3273, 2924, 1653, 1371, 1206, 1075, 1008, 979, 750, 726, 697  $\text{cm}^{-1}$ ;  $^1\text{H-NMR}$  (500 MHz,  $\text{CD}_3\text{OD}$ )  $\delta$  7.33–7.28 (m, 5H, Ar-H), 5.90 (d, 1H,  $J_{1,2} = 3.7$  Hz, H-1), 4.84 (s, 2H,  $\text{PhCH}_2$ ), 4.49 (d, 1H,  $J_{2,3} \sim 0$  Hz, H-2), 4.44 (td, 1H,  $J_{3,4} = 2.9$  Hz,  $J_{4,5a} = 6.0$  Hz,  $J_{4,5b} = 7.0$  Hz, H-4), 4.17 (d, 1H,  $J_{1',2'} = 9.0$  Hz, H-1'), 4.04 (d, 1H,  $J_{3,4} = 2.9$  Hz, H-3), 3.85 (dd, 1H,  $J_{3',4'} = 3.4$  Hz,  $J_{4',5'} = 0.9$  Hz, H-4'), 3.81 (t, 1H,  $J_{2',3'} = 9.4$  Hz, H-2'), 3.77 (dd, 1H,  $J_{5',6'a} = 6.8$  Hz,  $J_{6'a,6'b} = 11.5$  Hz, H-6'a), 3.69 (dd, 1H,  $J_{5',6'b} = 5.1$  Hz, H-6'b), 3.51 (ddd, 1H, H-5'), 3.54 (dd, 1H, Hz, H-3'), 3.39 (dd, 1H,  $J_{5a,5b} = 14.1$  Hz,  $J_{5a,4} = 6.0$  Hz, H-5a), 3.19 (dd, 1H,  $J_{5b,4} = 7.0$  Hz, H-5b), 1.44, 1.30 (2s, 3H each,  $\text{C}(\text{CH}_3)_2$ );  $^{13}\text{C-NMR}$  (75.5 MHz,  $\text{CD}_3\text{OD}$ )  $\delta$  138.0, 130.1, 129.5, 129.2 (Ar-C), 112.5 ( $\text{C}(\text{CH}_3)_2$ ), 106.2 (C-1), 95.4 (C-1'), 86.6 (C-2), 79.6 (C-4), 78.6 (C-5'), 77.5 ( $\text{PhCH}_2$ ), 76.3 (C-3), 76.1 (C-3'), 70.6 (C-4'), 69.3 (C-2'), 62.7 (C-6'), 51.7 (C-5), 27.1, 26.3 ( $\text{C}(\text{CH}_3)_2$ ); HRLSI-MS  $m/z$  calcd for  $\text{C}_{21}\text{H}_{31}\text{NNaO}_{10}$ ,  $[\text{M} + \text{Na}]^+$  : 480.1846, found: 480.1862.

## B. X-Ray Structural Characterization of New Compounds 6, 7 and 8

### B.1 General procedures.

A single crystals of suitable size of **6**, **7** and **8**, coated with dry perfluoropolyether was mounted on a glass fiber and fixed in a cold nitrogen stream [ $T = 173(2)$  K] to the goniometer head. Data collections were performed on Bruker-Nonius X8APEX-II CCD diffractometer, using monochromatic radiation  $\lambda(\text{Mo } K_{\alpha 1}) = 0.71073 \text{ \AA}$ , by means of  $\omega$  and  $\phi$  scans. The data were reduced (SAINT)<sup>3</sup> and corrected for Lorentz polarization effects and absorption by multiscan method applied by SADABS<sup>4</sup>. The structure were solved by direct methods (SIR-2002)<sup>5</sup> and refined against all  $F^2$  data by full-matrix least-squares techniques (SHELXTL-6.12).<sup>6</sup> All the non-hydrogen atoms were refined with anisotropic displacement parameters. The hydrogen atoms were included from calculated positions and refined riding on their respective carbon atoms with isotropic displacement parameters.

### B.2. X-Ray data of 6

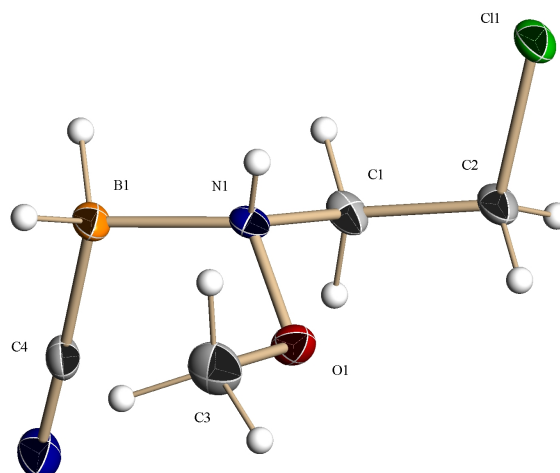

<sup>3</sup> SAINT 6.02, BRUKEF

<sup>4</sup> SADABS George Sheldrick, Bruker AXS, Inc., Madison, Wisconsin, USA, 1999.

<sup>5</sup> M.C.Burla, M. Camalli, B. Carrozzini, G.L. Casciarano, C. Giacovazzo, G. Polidori, R. Spagna  
SIR2002: the program; *J. Appl. Cryst.* (2003). **36**, 1103.

<sup>6</sup> [7] SHELXTL 6.14, Bruker AXS, Inc., Madison, Wisconsin, USA, 2000–2003.

**Figure 1.** ORTEP drawing of **6** showing thermal ellipsoids. at the 50% probability level.

**Table 1.** Crystal data and structure refinement of **6**.

|                                   |                                                    |                        |
|-----------------------------------|----------------------------------------------------|------------------------|
| Empirical formula                 | C <sub>4</sub> H <sub>10</sub> BCIN <sub>2</sub> O |                        |
| Formula weight                    | 148.40                                             |                        |
| Temperature                       | 173(2) K                                           |                        |
| Wavelength                        | 0.71073 Å                                          |                        |
| Crystal system                    | Triclinic                                          |                        |
| Space group                       | P $\bar{1}$                                        |                        |
| Unit cell dimensions              | a = 6.2785(6) Å                                    | $\alpha$ = 83.088(3)°. |
|                                   | b = 6.5034(6) Å                                    | $\beta$ = 87.368(4)°.  |
|                                   | c = 9.6048(9) Å                                    | $\gamma$ = 78.440(3)°. |
| Volume                            | 381.34(6) Å <sup>3</sup>                           |                        |
| Z                                 | 2                                                  |                        |
| Density (calculated)              | 1.292 Mg/m <sup>3</sup>                            |                        |
| Absorption coefficient            | 0.424 mm <sup>-1</sup>                             |                        |
| F(000)                            | 156                                                |                        |
| Crystal size                      | 0.44 x 0.33 x 0.18 mm <sup>3</sup>                 |                        |
| Theta range for data collection   | 2.14 to 30.59°.                                    |                        |
| Index ranges                      | -8 ≤ h ≤ 8, -9 ≤ k ≤ 5, -13 ≤ l ≤ 12               |                        |
| Reflections collected             | 6575                                               |                        |
| Independent reflections           | 2301 [R(int) = 0.0335]                             |                        |
| Completeness to theta = 25.00°    | 98.3 %                                             |                        |
| Absorption correction             | Semi-empirical from equivalents                    |                        |
| Max. and min. transmission        | 0.9276 and 0.8171                                  |                        |
| Refinement method                 | Full-matrix least-squares on F <sup>2</sup>        |                        |
| Data / restraints / parameters    | 2301 / 0 / 92                                      |                        |
| Goodness-of-fit on F <sup>2</sup> | 1.095                                              |                        |
| Final R indices [I > 2σ(I)]       | R1 = 0.0405, wR2 = 0.0956                          |                        |
| R indices (all data)              | R1 = 0.0566, wR2 = 0.1140                          |                        |
| Largest diff. peak and hole       | 0.683 and -0.386 e.Å <sup>-3</sup>                 |                        |

### B.3. X-ray data of 7

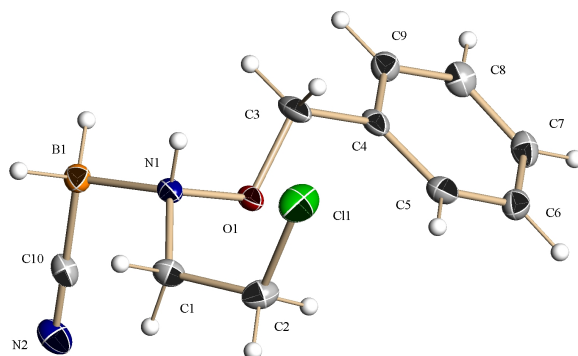

**Figure 2.** ORTEP drawing of 7 showing thermal ellipsoids at the 50% probability level.

**Table 2.** Crystal data and structure refinement of 7.

|                                   |                                                                    |                               |
|-----------------------------------|--------------------------------------------------------------------|-------------------------------|
| Empirical formula                 | $C_{10}H_{14}BCIN_2O$                                              |                               |
| Formula weight                    | 224.49                                                             |                               |
| Temperature                       | 173(2) K                                                           |                               |
| Wavelength                        | 0.71073 Å                                                          |                               |
| Crystal system                    | Monoclinic                                                         |                               |
| Space group                       | $P2_1/c$                                                           |                               |
| Unit cell dimensions              | $a = 9.5051(4)$ Å                                                  | $\alpha = 90^\circ$ .         |
|                                   | $b = 12.3772(5)$ Å                                                 | $\beta = 92.1500(10)^\circ$ . |
|                                   | $c = 9.9685(4)$ Å                                                  | $\gamma = 90^\circ$ .         |
| Volume                            | $1171.93(8)$ Å <sup>3</sup>                                        |                               |
| Z                                 | 4                                                                  |                               |
| Density (calculated)              | 1.272 Mg/m <sup>3</sup>                                            |                               |
| Absorption coefficient            | 0.300 mm <sup>-1</sup>                                             |                               |
| F(000)                            | 472                                                                |                               |
| Crystal size                      | 0.50 x 0.30 x 0.23 mm <sup>3</sup>                                 |                               |
| Theta range for data collection   | 3.44 to 30.53°.                                                    |                               |
| Index ranges                      | $-13 \leq h \leq 13$ , $-17 \leq k \leq 17$ , $-14 \leq l \leq 14$ |                               |
| Reflections collected             | 33074                                                              |                               |
| Independent reflections           | 3579 [R(int) = 0.0320]                                             |                               |
| Completeness to theta = 30.53°    | 99.7 %                                                             |                               |
| Absorption correction             | Semi-empirical from equivalents                                    |                               |
| Max. and min. transmission        | 0.9341 and 0.8643                                                  |                               |
| Refinement method                 | Full-matrix least-squares on F <sup>2</sup>                        |                               |
| Data / restraints / parameters    | 3579 / 0 / 145                                                     |                               |
| Goodness-of-fit on F <sup>2</sup> | 1.047                                                              |                               |

|                                      |                                    |
|--------------------------------------|------------------------------------|
| Final R indices [ $I > 2\sigma(I)$ ] | R1 = 0.0317, wR2 = 0.0851          |
| R indices (all data)                 | R1 = 0.0412, wR2 = 0.0893          |
| Largest diff. peak and hole          | 0.397 and -0.274 e.Å <sup>-3</sup> |

#### B.4. X-Ray data of **8**

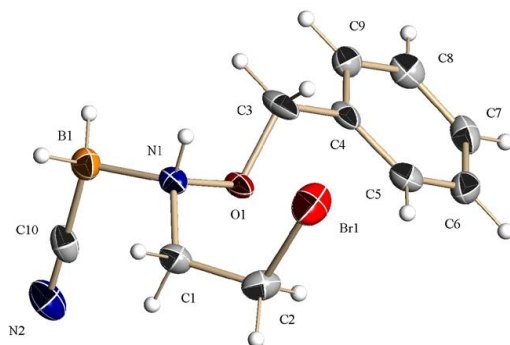

**Figure 3.** ORTEP drawing for **8** showing thermal ellipsoids. at the 50% probability level.

**Table 3.** Crystal data and structure refinement of **8**.

|                                 |                                                                   |                             |
|---------------------------------|-------------------------------------------------------------------|-----------------------------|
| Empirical formula               | $C_{10}H_{14}BBrN_2O$                                             |                             |
| Formula weight                  | 268.95                                                            |                             |
| Temperature                     | 173(2) K                                                          |                             |
| Wavelength                      | 0.71073 Å                                                         |                             |
| Crystal system                  | Monoclinic                                                        |                             |
| Space group                     | $P2_1/c$                                                          |                             |
| Unit cell dimensions            | $a = 9.6308(3)$ Å                                                 | $\alpha = 90^\circ$ .       |
|                                 | $b = 12.4411(4)$ Å                                                | $\beta = 92.716(2)^\circ$ . |
|                                 | $c = 9.9555(4)$ Å                                                 | $\gamma = 90^\circ$ .       |
| Volume                          | $1191.51(7)$ Å <sup>3</sup>                                       |                             |
| Z                               | 4                                                                 |                             |
| Density (calculated)            | 1.499 Mg/m <sup>3</sup>                                           |                             |
| Absorption coefficient          | 3.425 mm <sup>-1</sup>                                            |                             |
| F(000)                          | 544                                                               |                             |
| Crystal size                    | 0.50 x 0.40 x 0.30 mm <sup>3</sup>                                |                             |
| Theta range for data collection | 3.31 to 28.82°.                                                   |                             |
| Index ranges                    | $-6 \leq h \leq 13$ , $-15 \leq k \leq 16$ , $-13 \leq l \leq 13$ |                             |
| Reflections collected           | 15111                                                             |                             |
| Independent reflections         | 3094 [R(int) = 0.0399]                                            |                             |
| Completeness to theta = 28.82°  | 99.3 %                                                            |                             |
| Absorption correction           | Semi-empirical from equivalents                                   |                             |
| Max. and min. transmission      | 0.3464 and 0.2091                                                 |                             |
| Refinement method               | Full-matrix least-squares on F <sup>2</sup>                       |                             |
| Data / restraints / parameters  | 3094 / 1 / 139                                                    |                             |

|                                      |                                    |
|--------------------------------------|------------------------------------|
| Goodness-of-fit on $F^2$             | 1.025                              |
| Final R indices [ $I > 2\sigma(I)$ ] | R1 = 0.0369, wR2 = 0.0736          |
| R indices (all data)                 | R1 = 0.0632, wR2 = 0.0829          |
| Largest diff. peak and hole          | 0.626 and -0.615 e.Å <sup>-3</sup> |

---



## B.5. Crystal packing

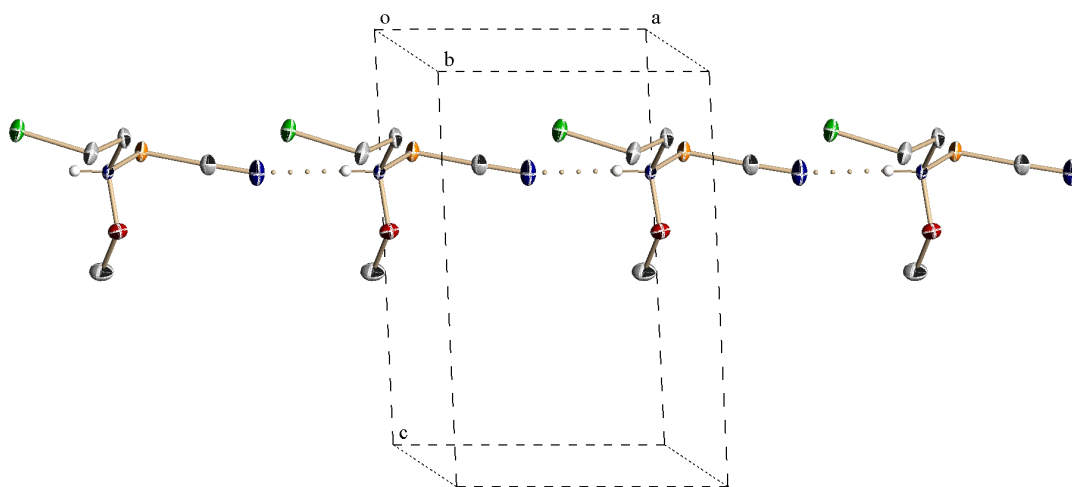

Figure 4. Crystal packing motif showing the chained hydrogen-bond structures of 6.

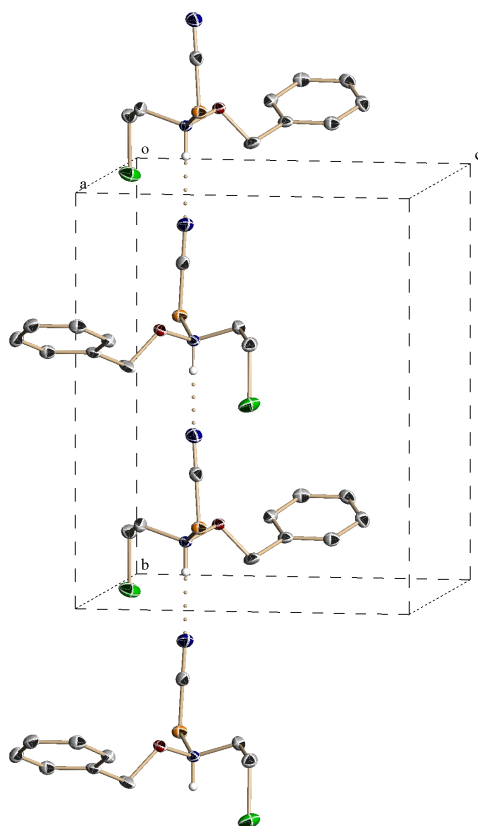

Figure 5. Crystal packing motif showing the chained hydrogen-bond structures of 7.

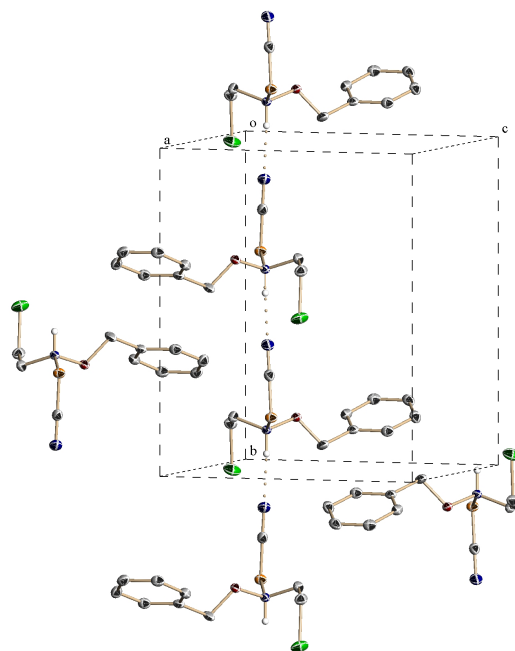

**Figure 6.** Crystal packing motif showing as the different chains of hydrogen-bond structures of **7** are interconnected through aromatic  $\pi$ - $\pi$  stacking interactions.

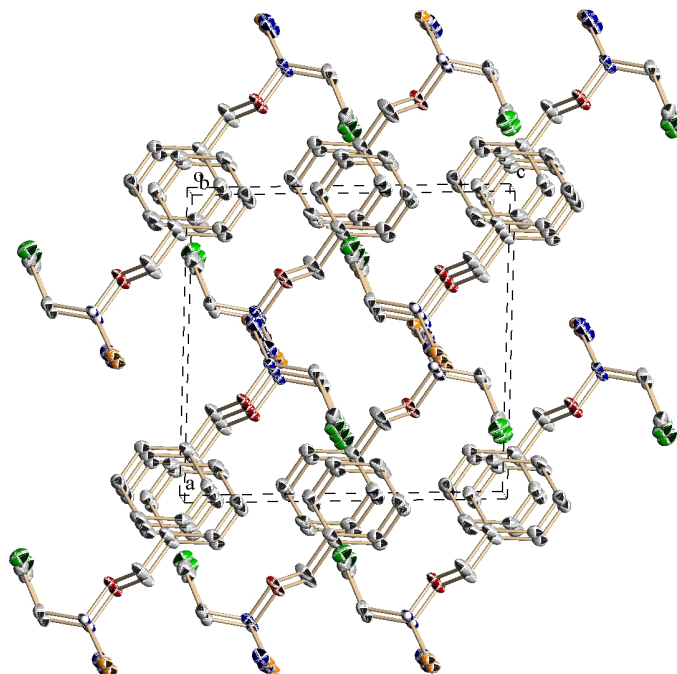

**Figure 7.** Crystal packing motif of **7** showing another view of the aromatic  $\pi$ - $\pi$  stacking interactions along the **b** axis.

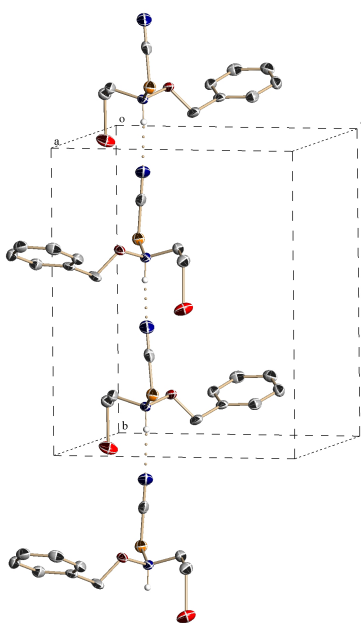

**Figure 8.** Crystal packing motif showing the chained hydrogen-bond structures of 8.

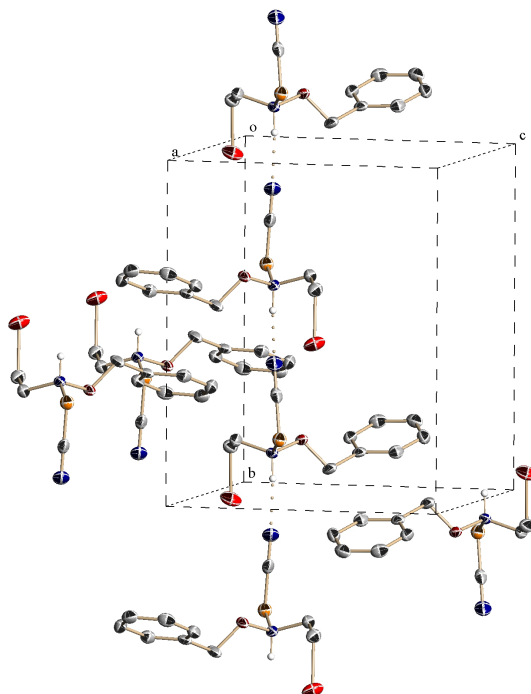

**Figure 9.** Crystal packing motif showing as the different chains of hydrogen-bond structures of 8 are interconnected through aromatic  $\pi$ - $\pi$  stacking interactions.

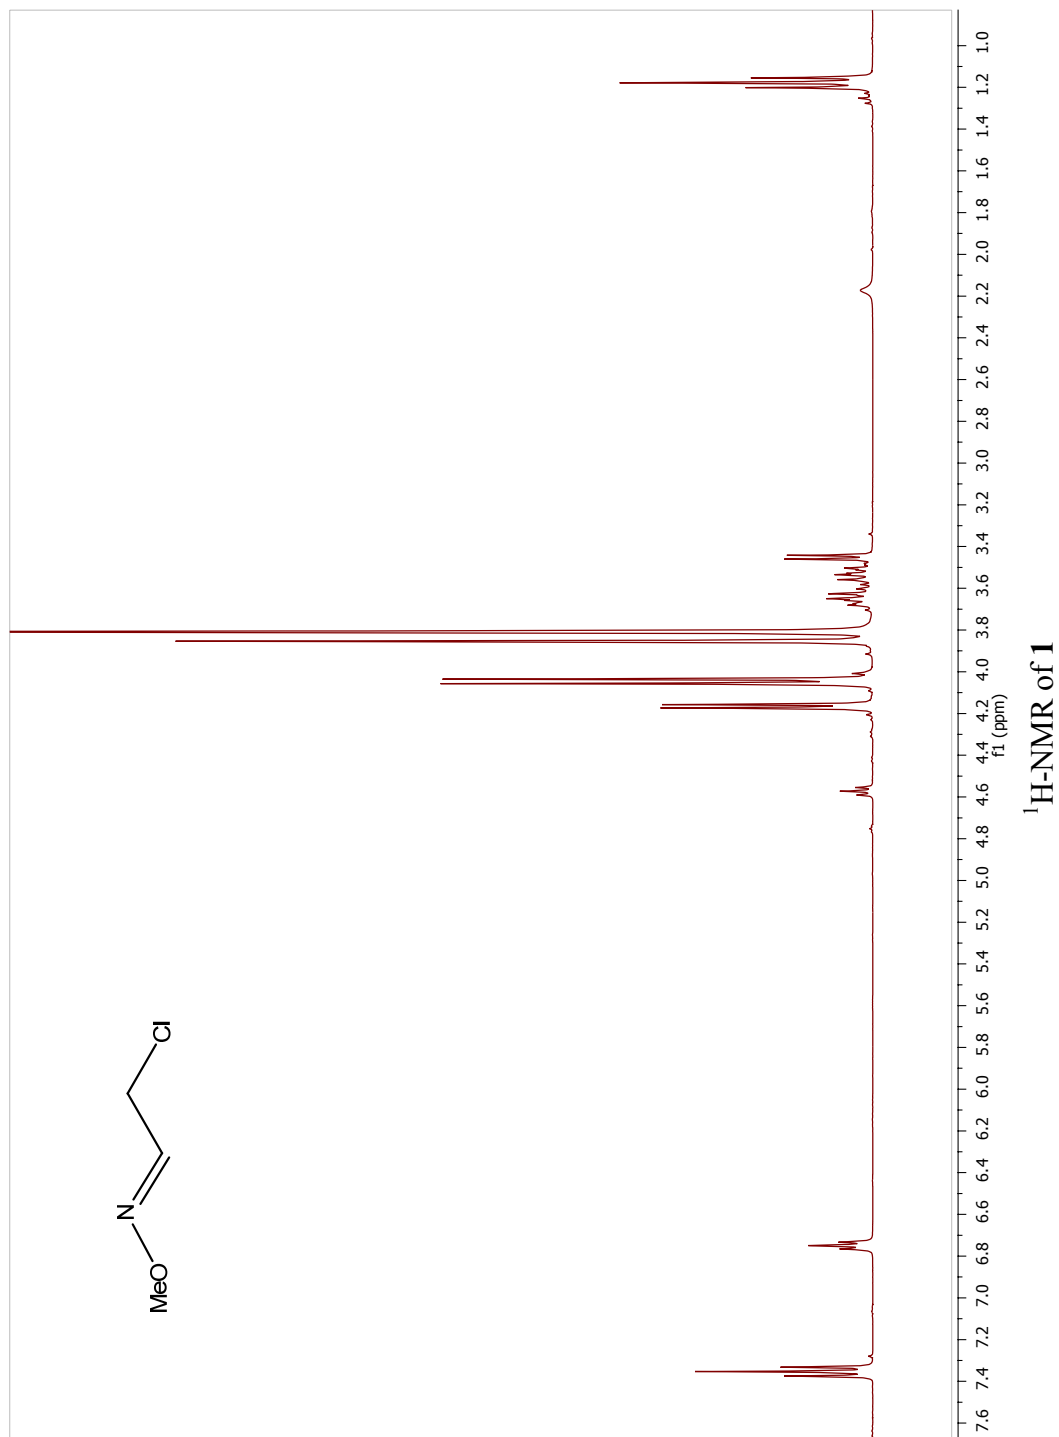

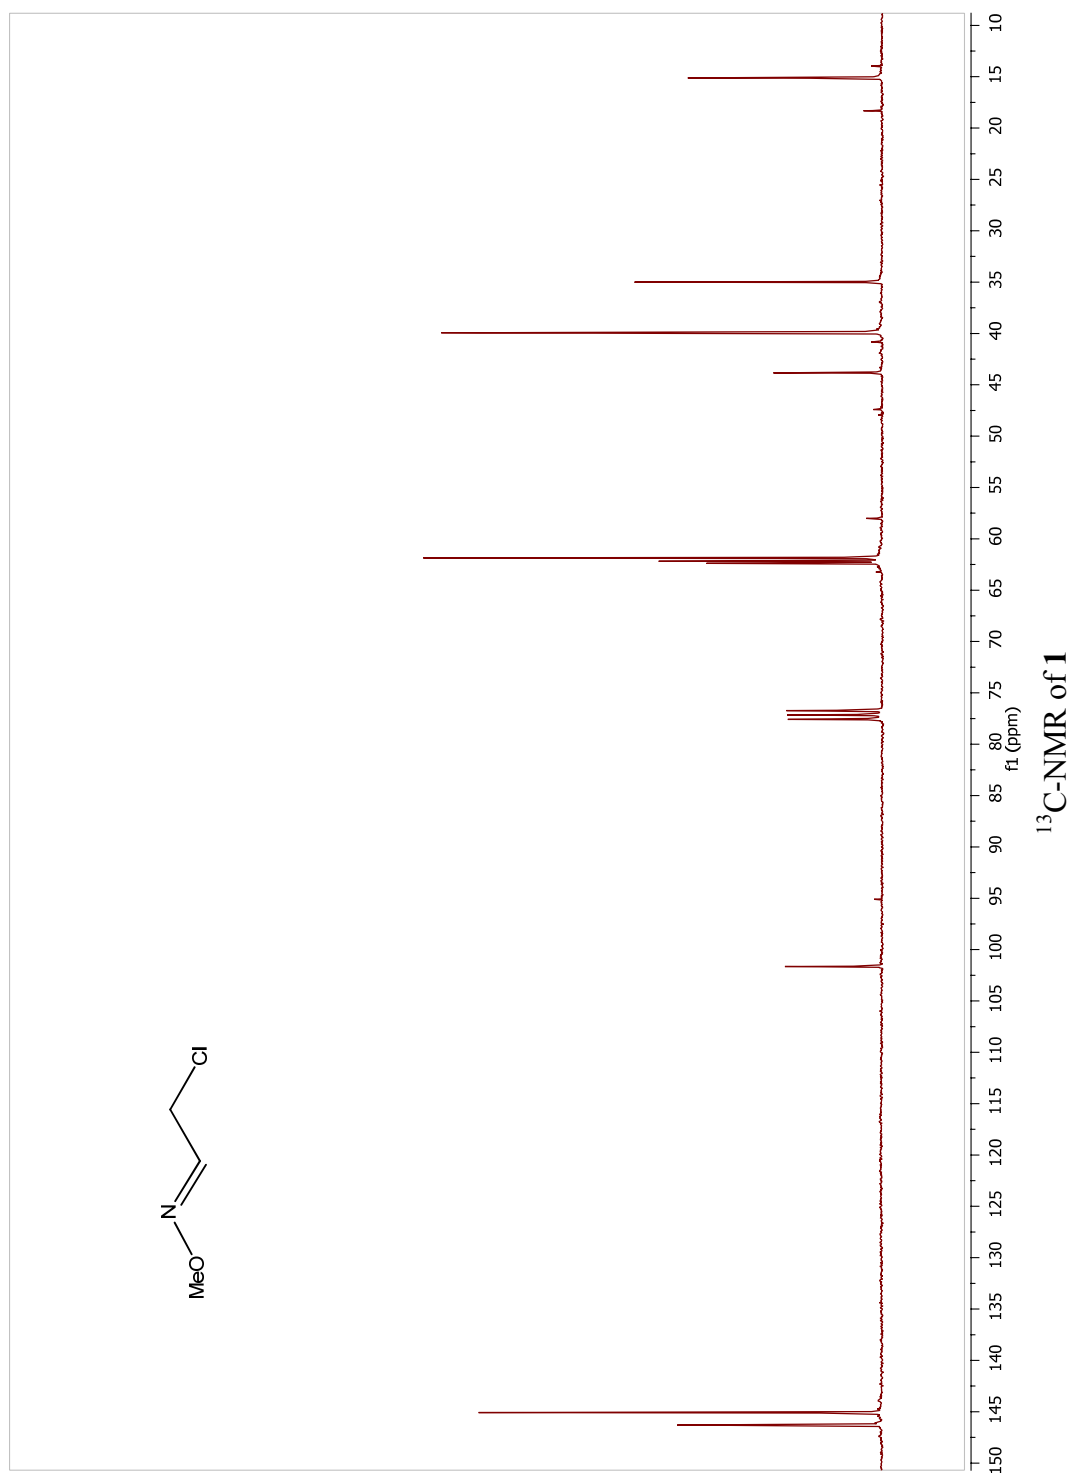

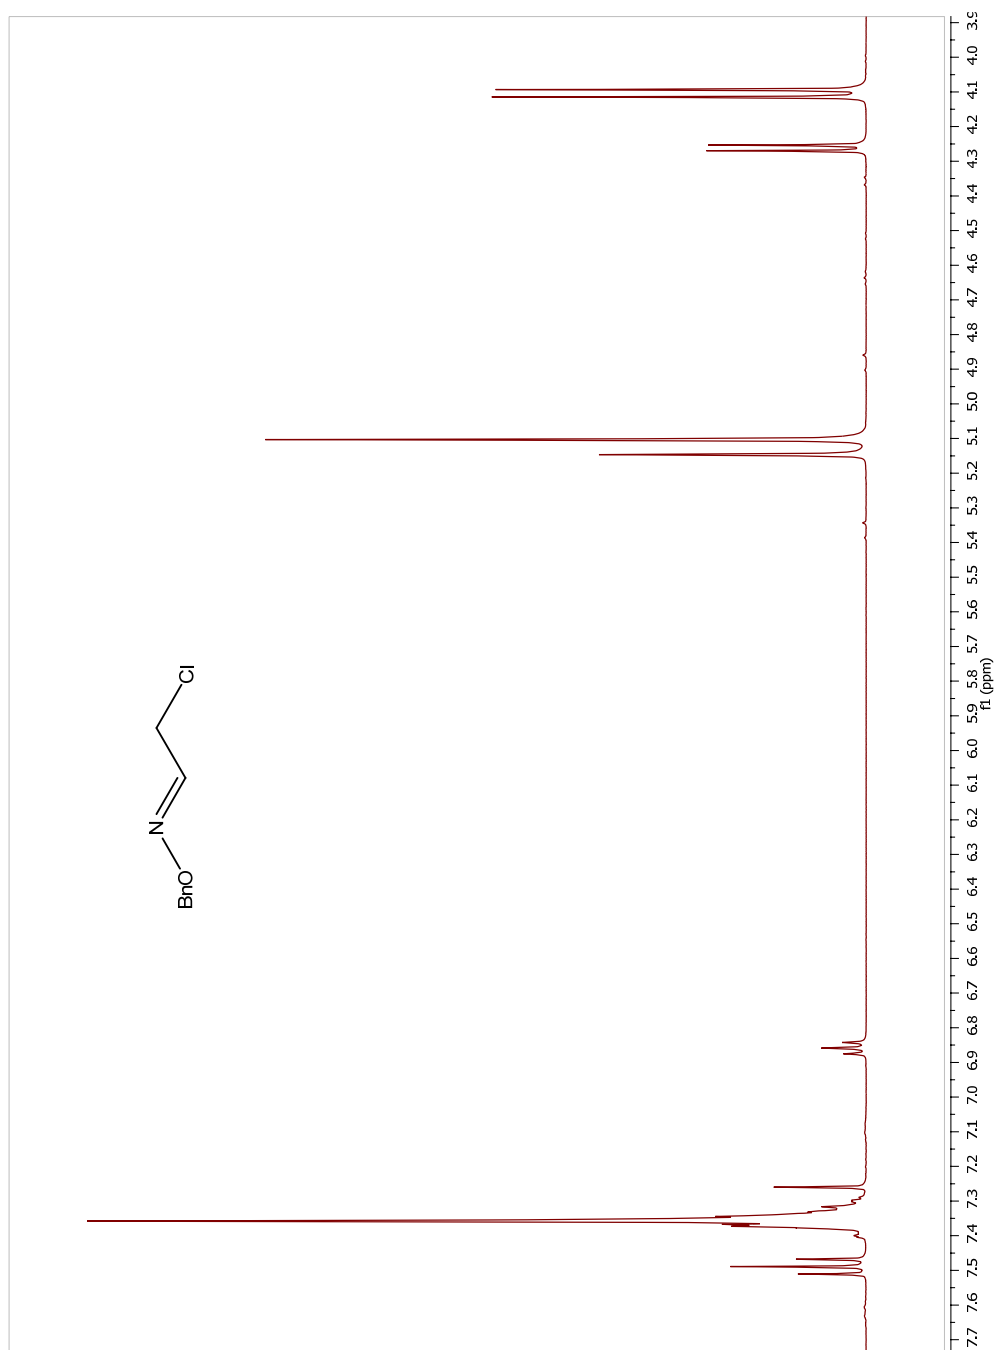

<sup>1</sup>H-NMR of 2

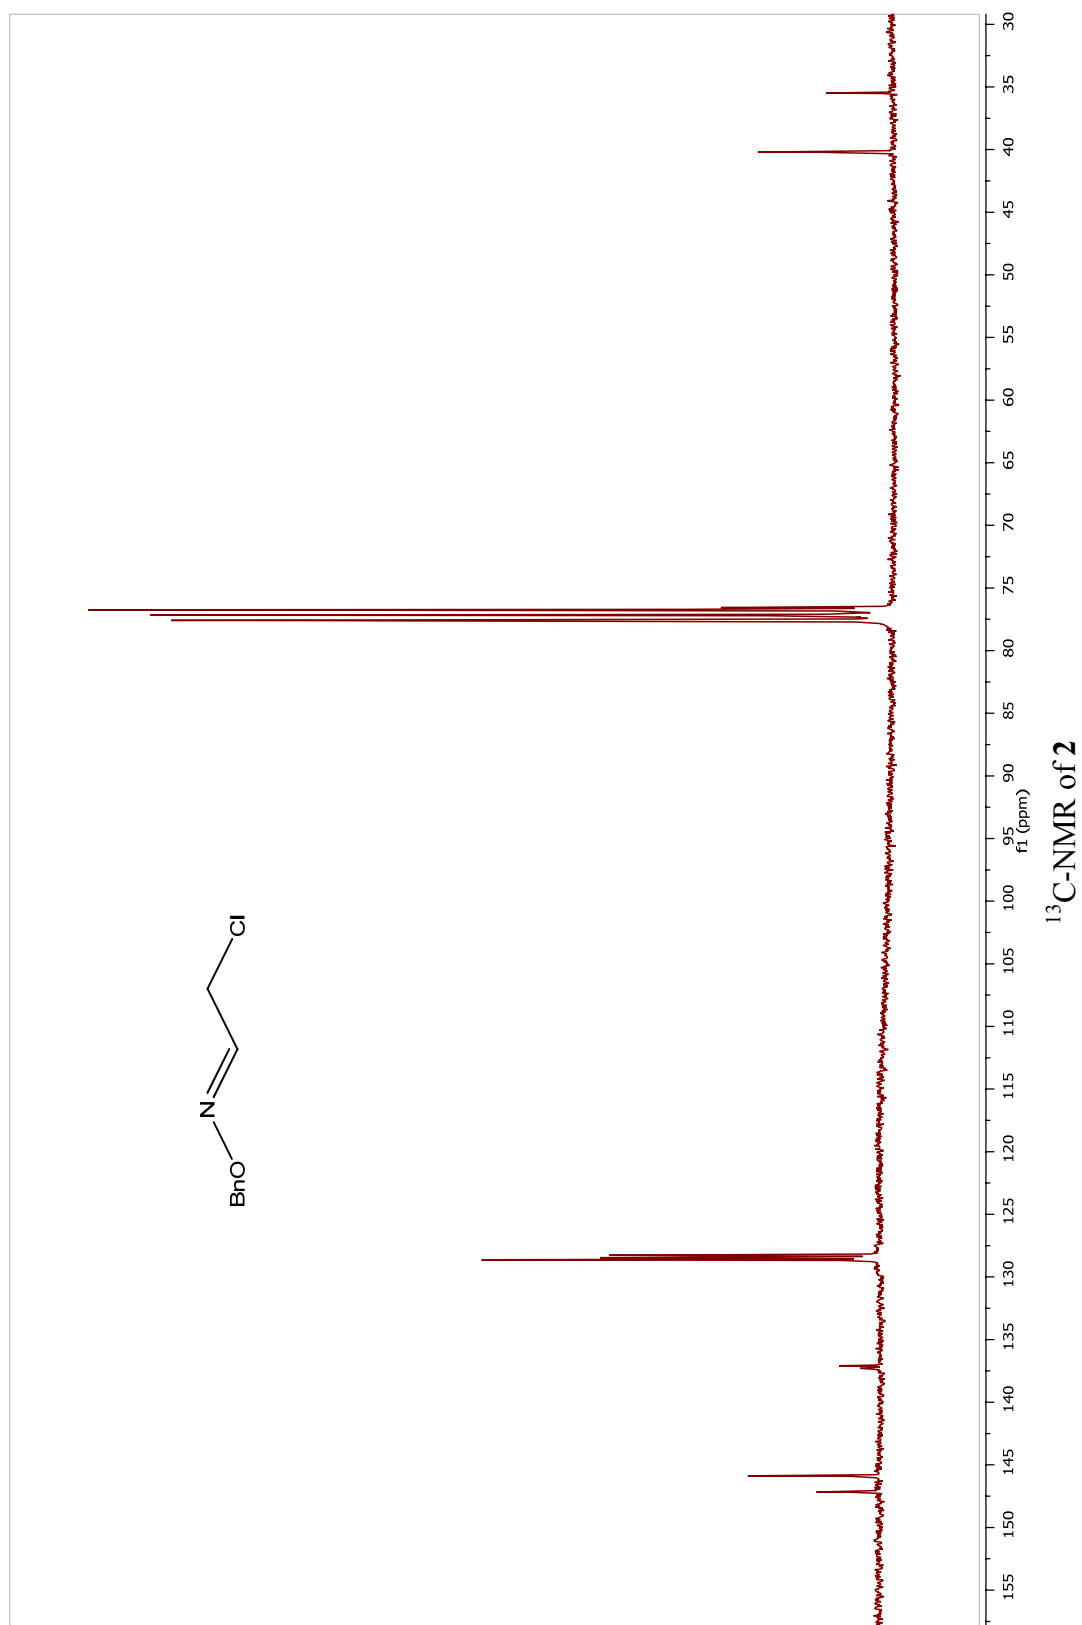

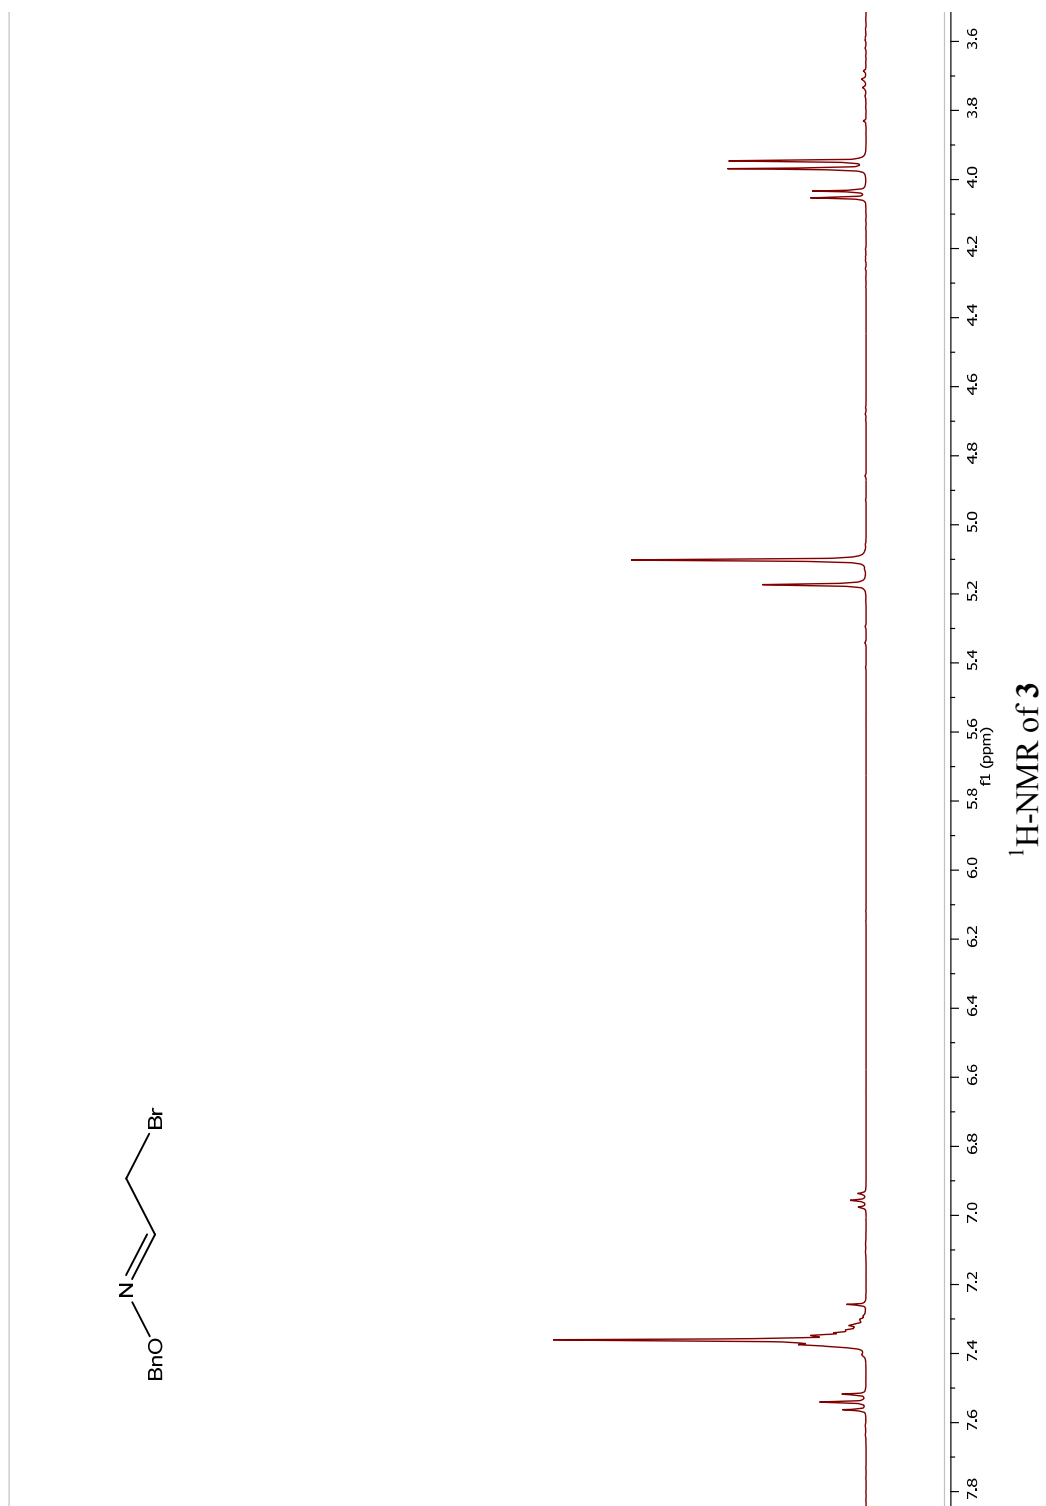



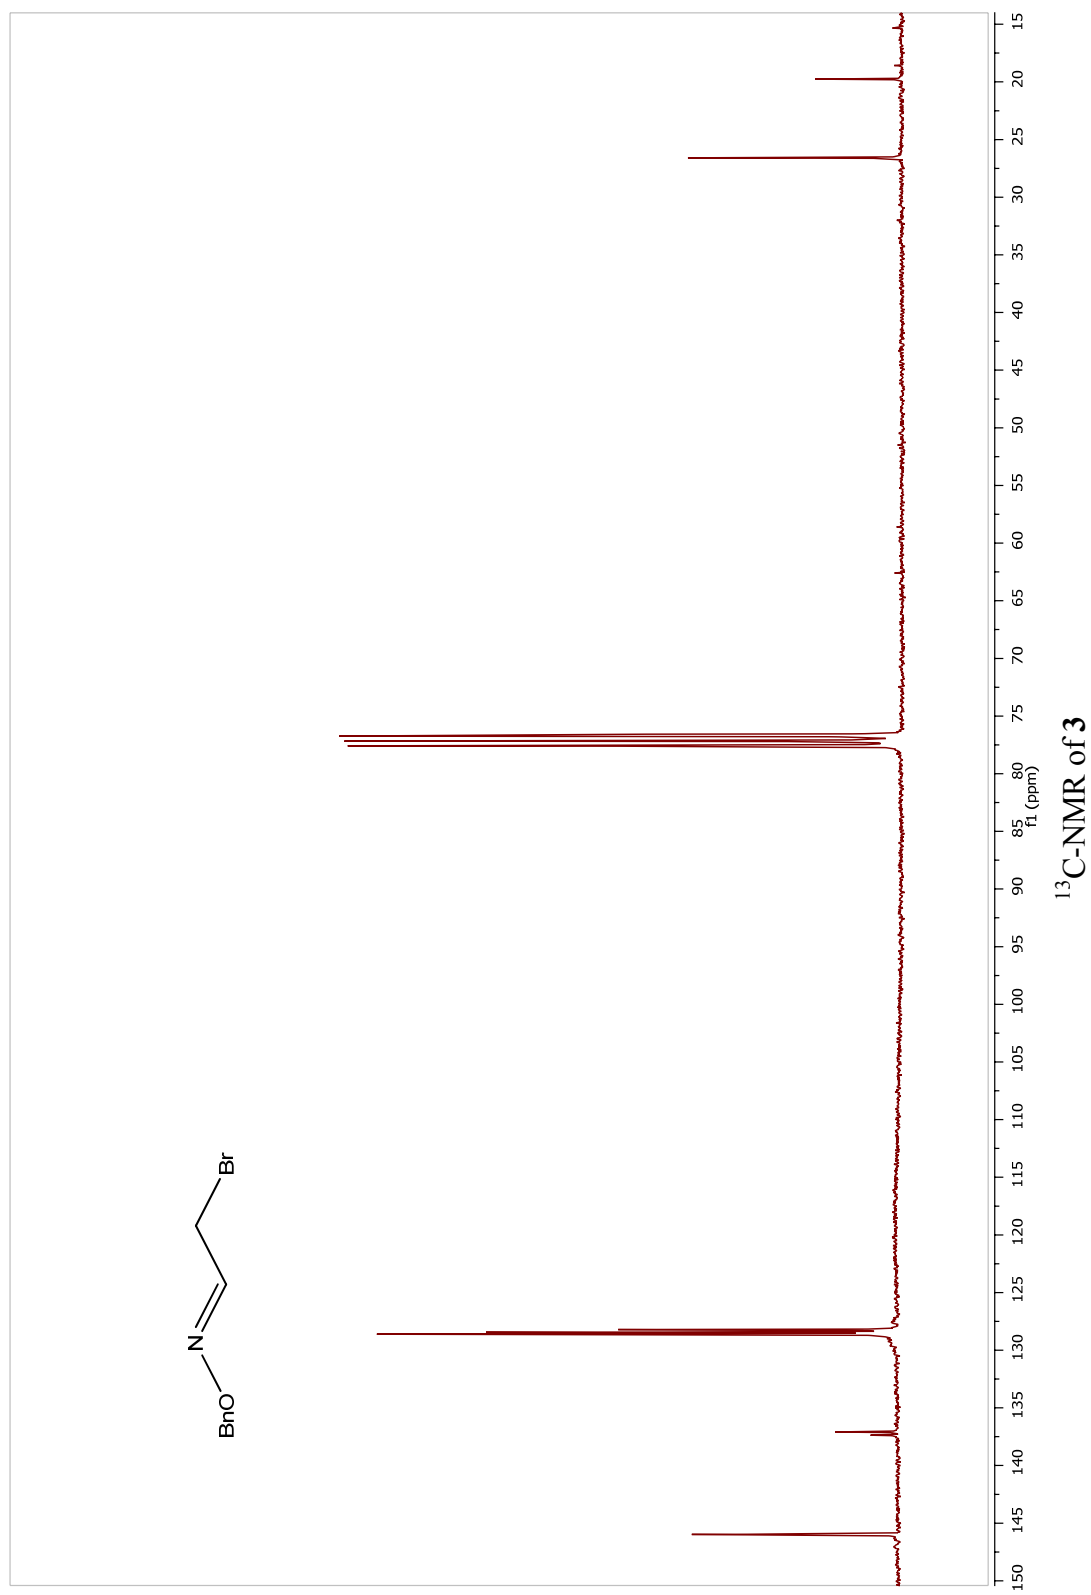

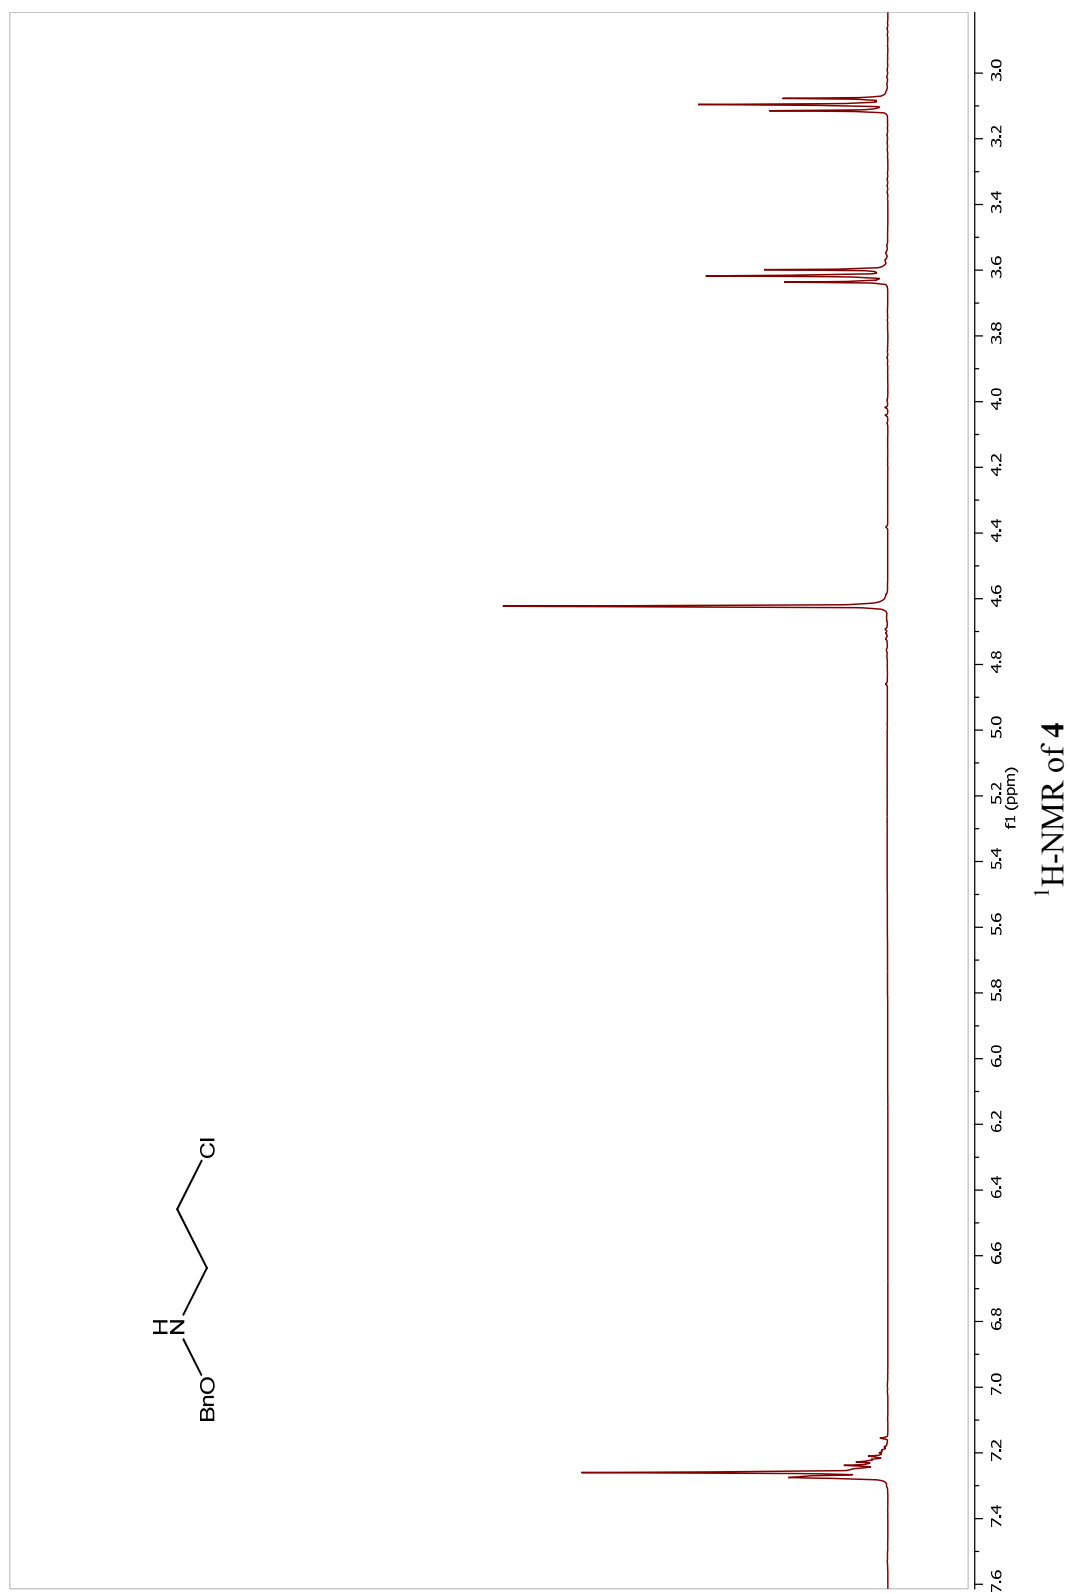

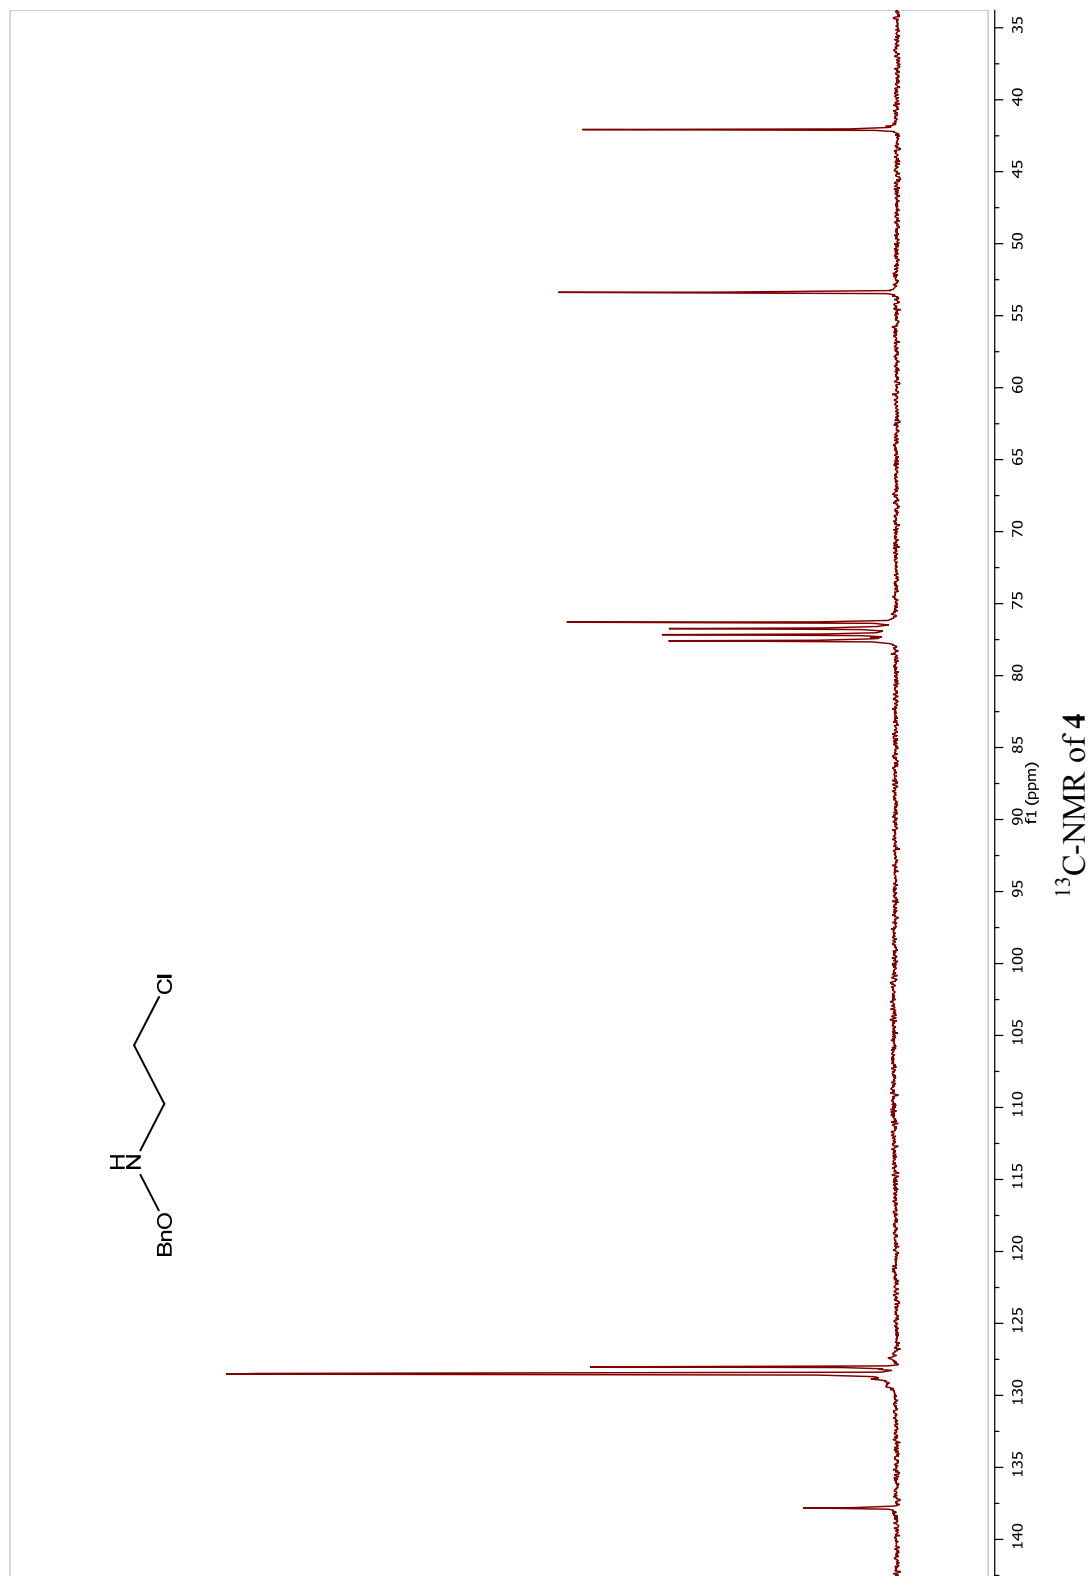

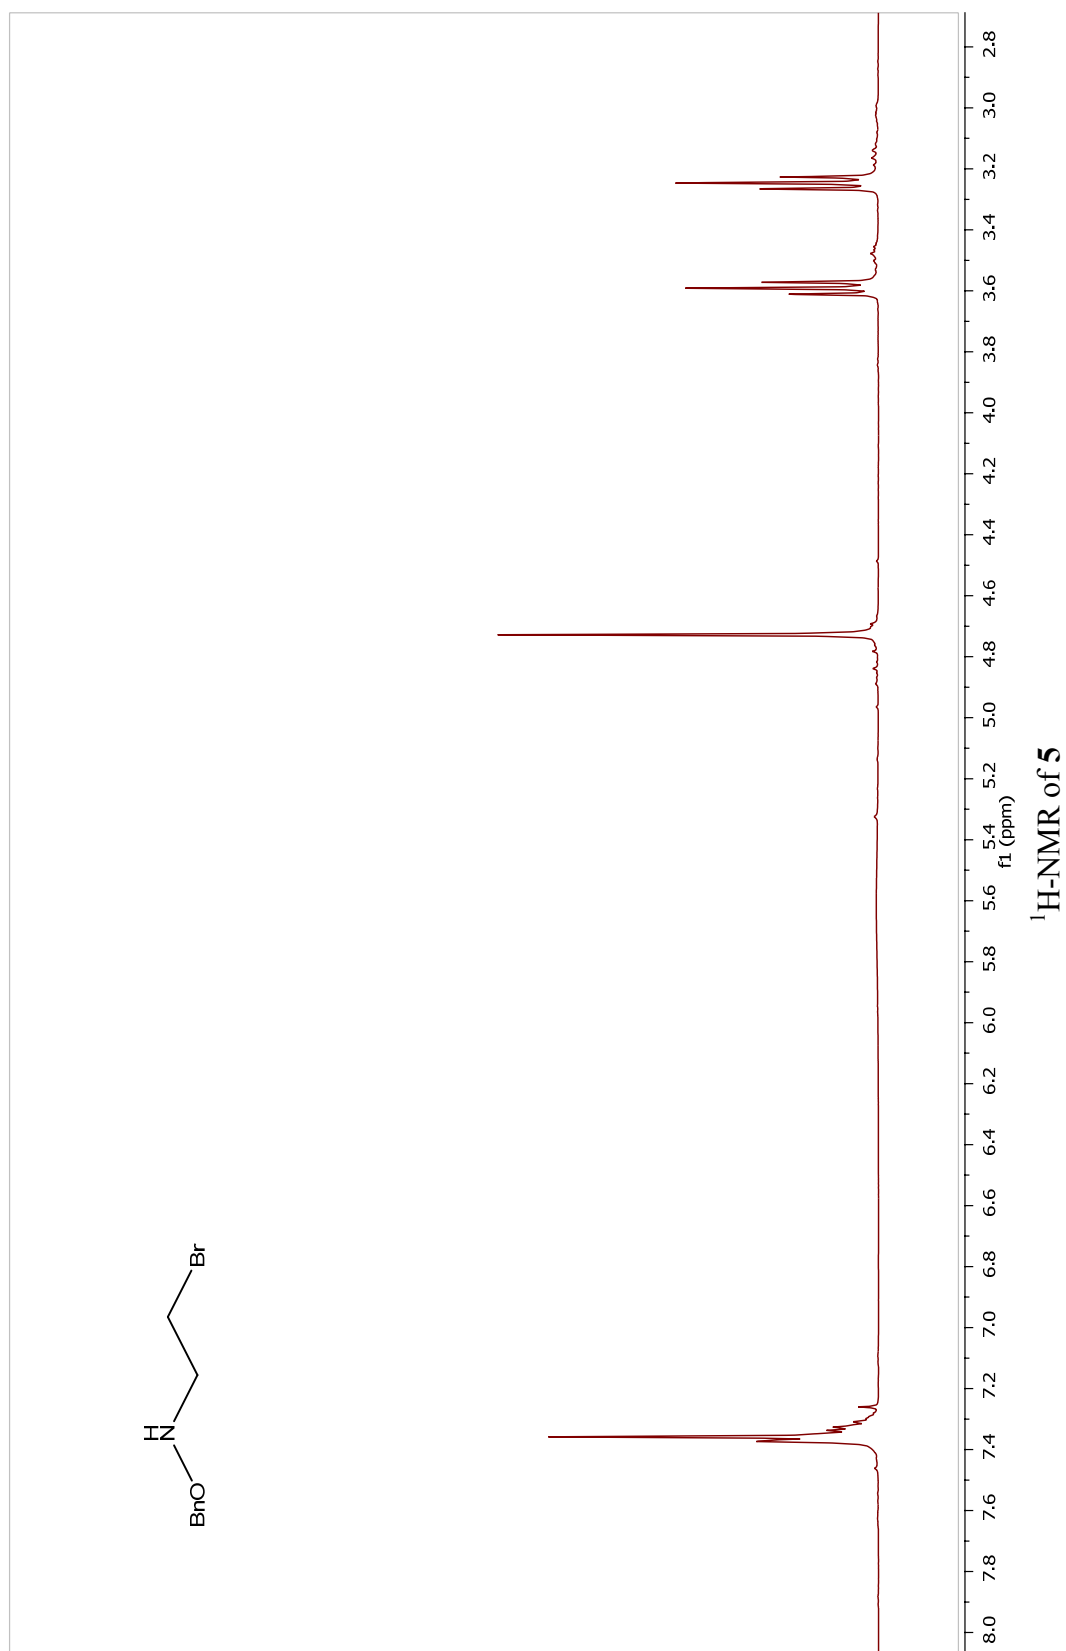

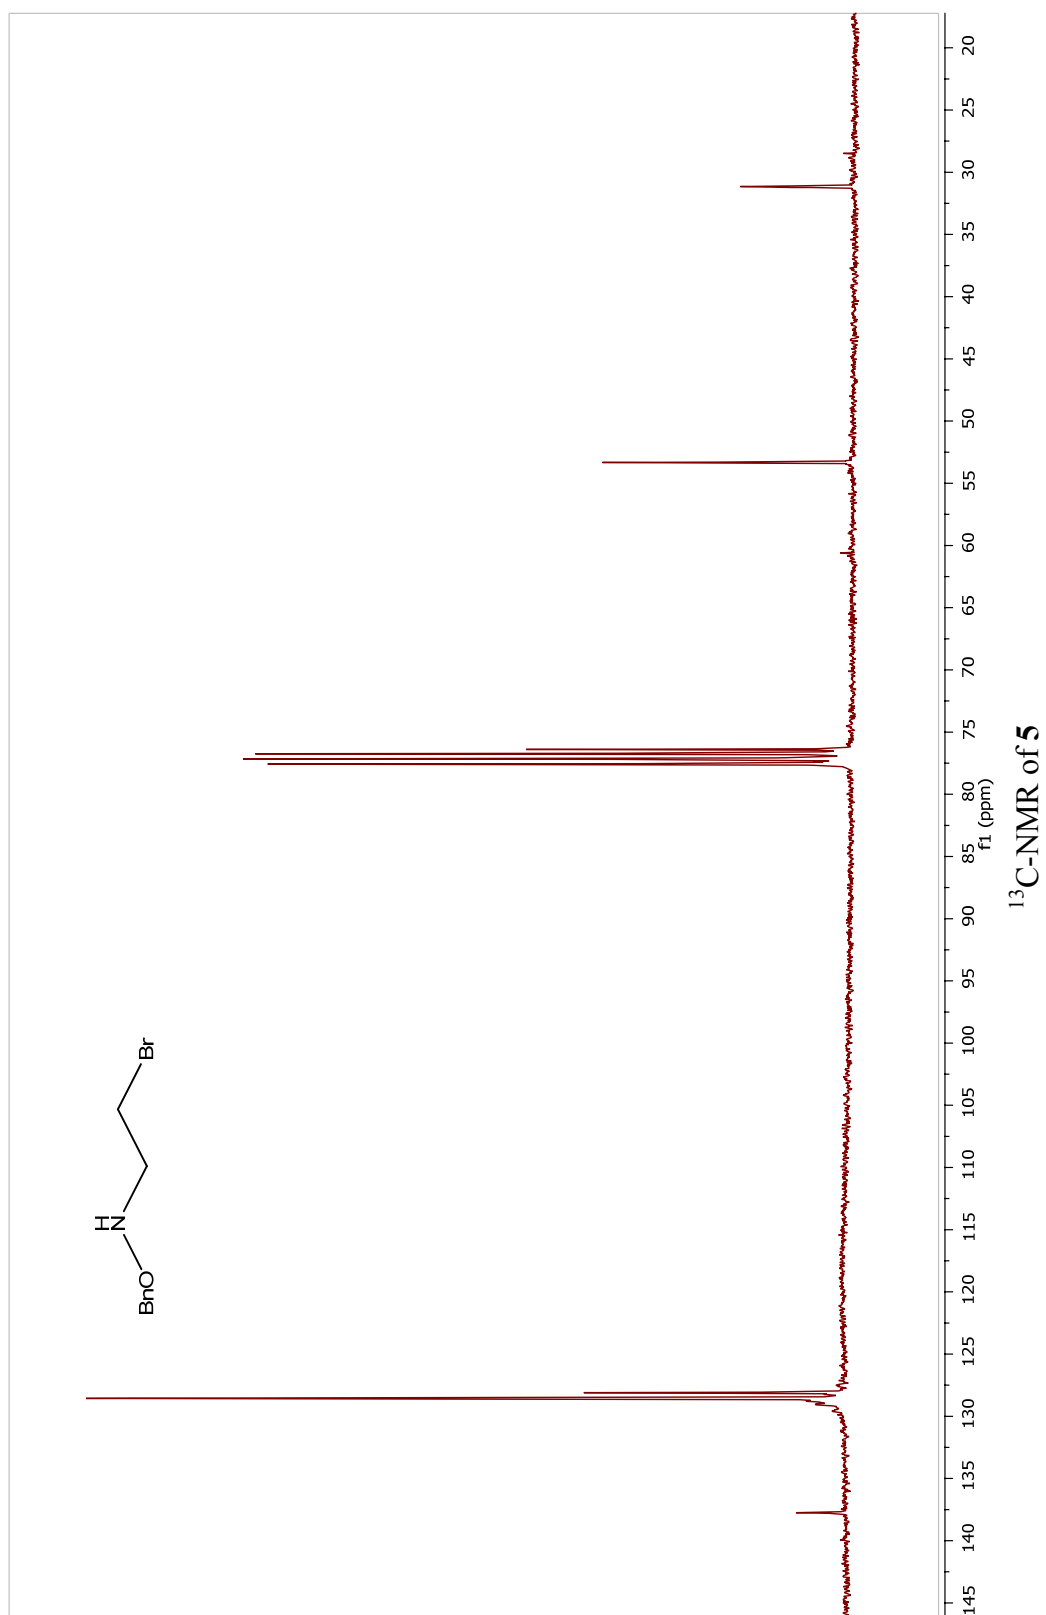

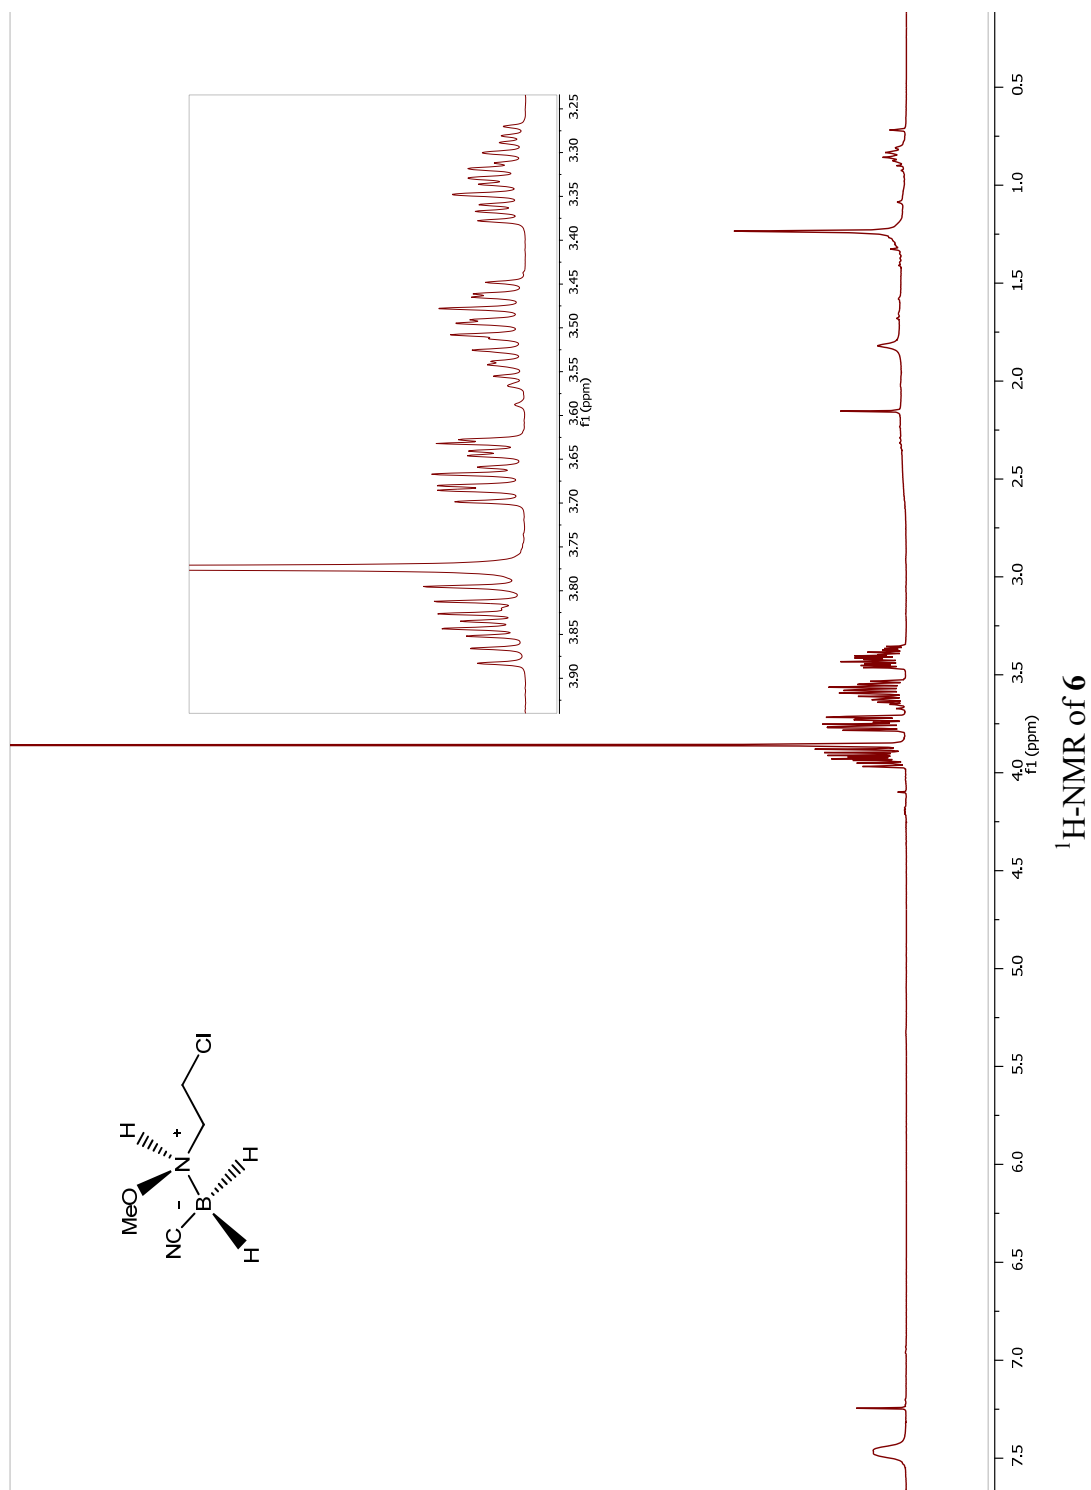

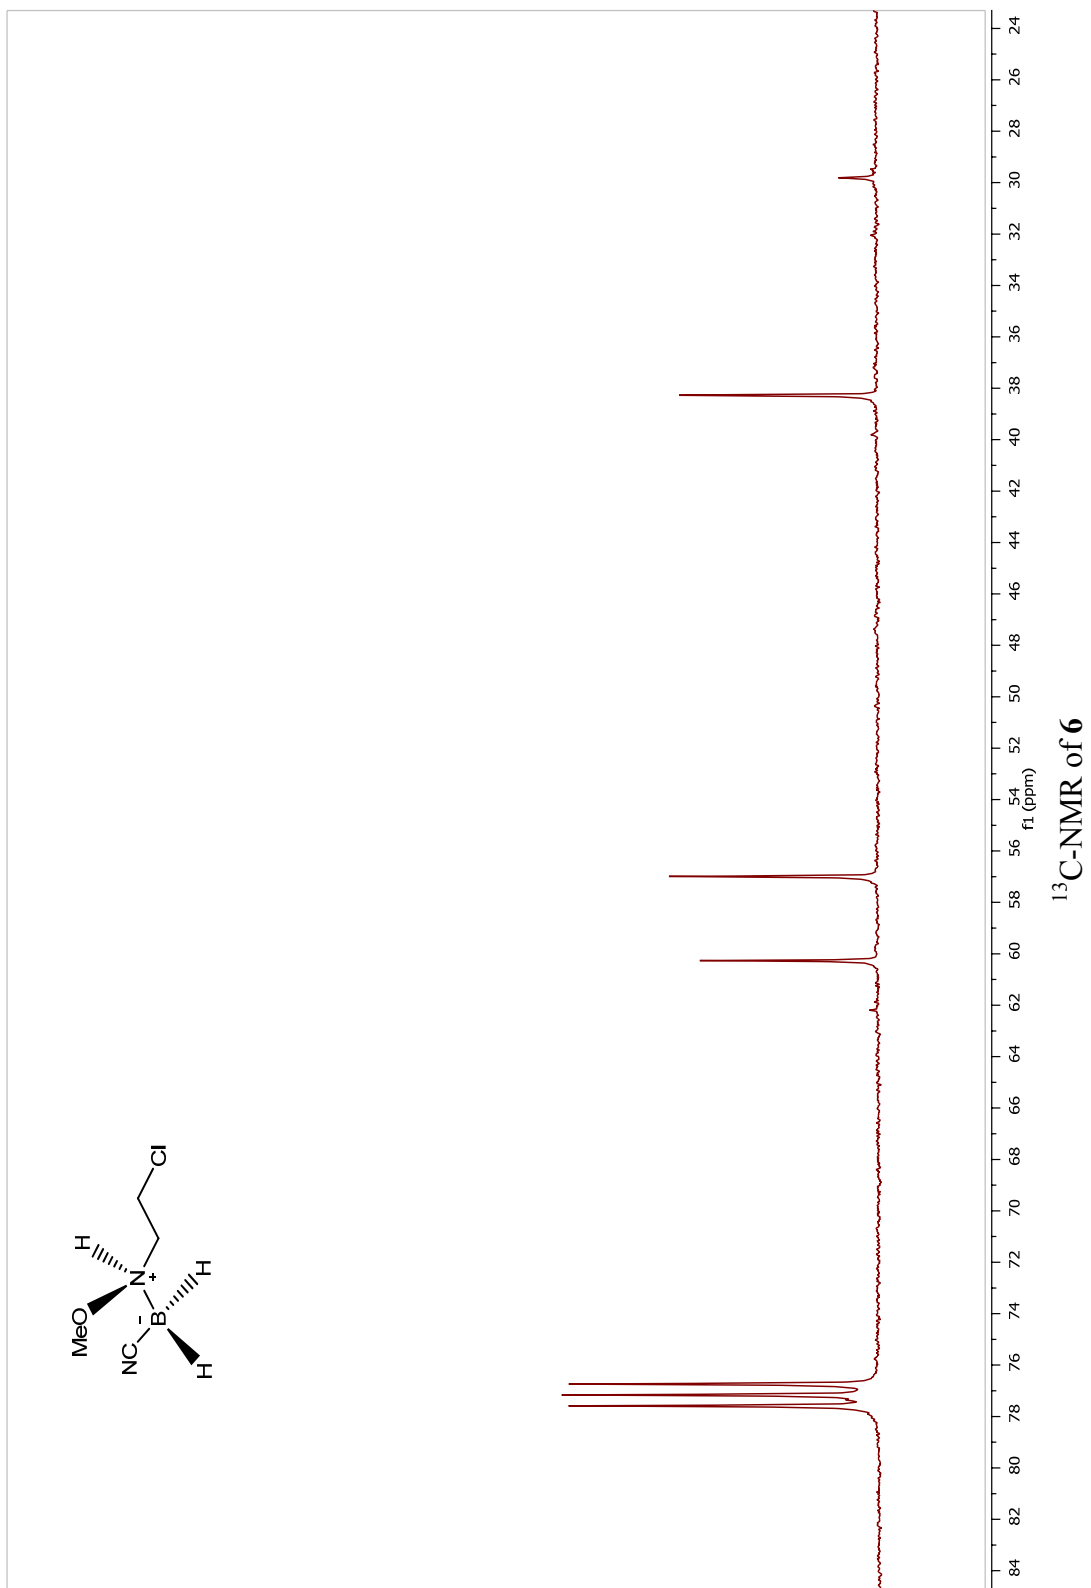

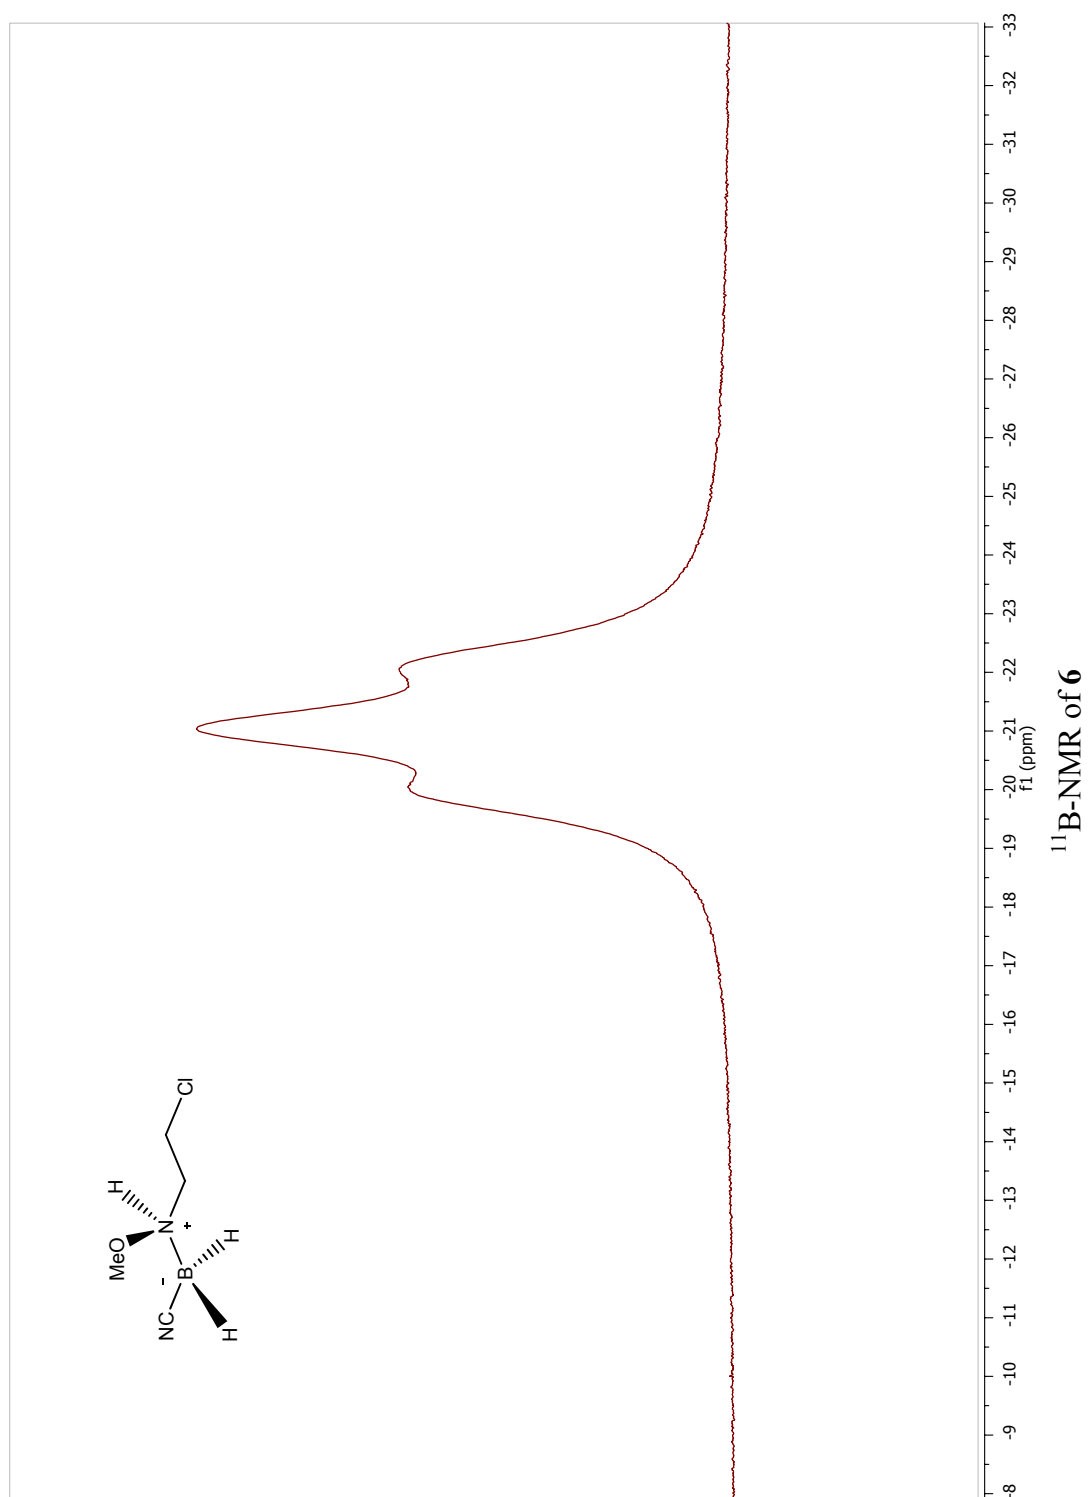



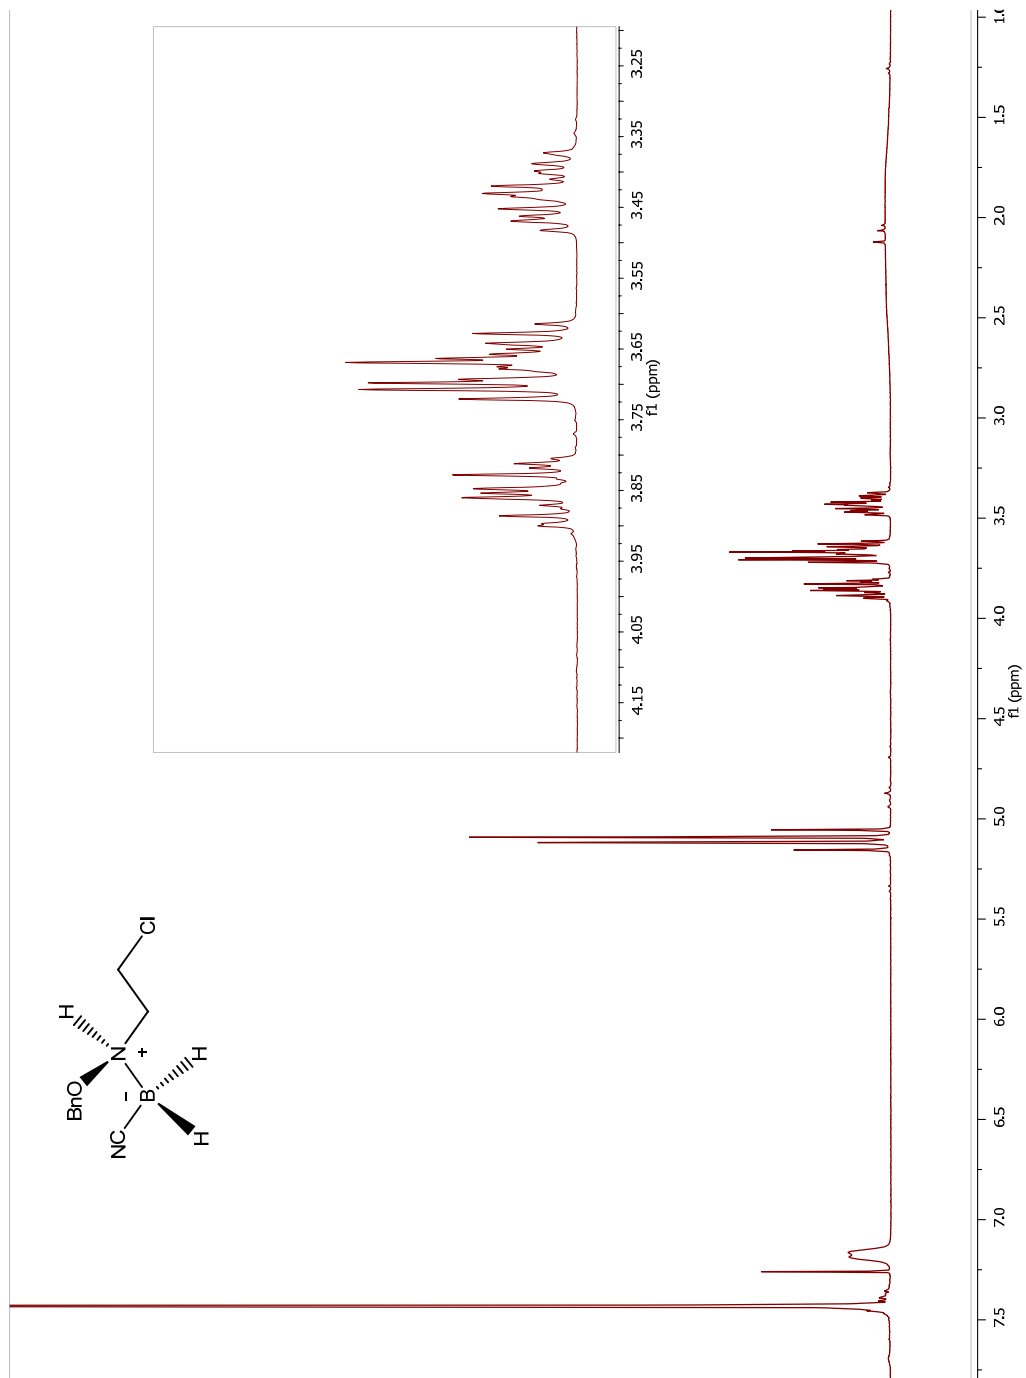

<sup>1</sup>H-NMR of 7

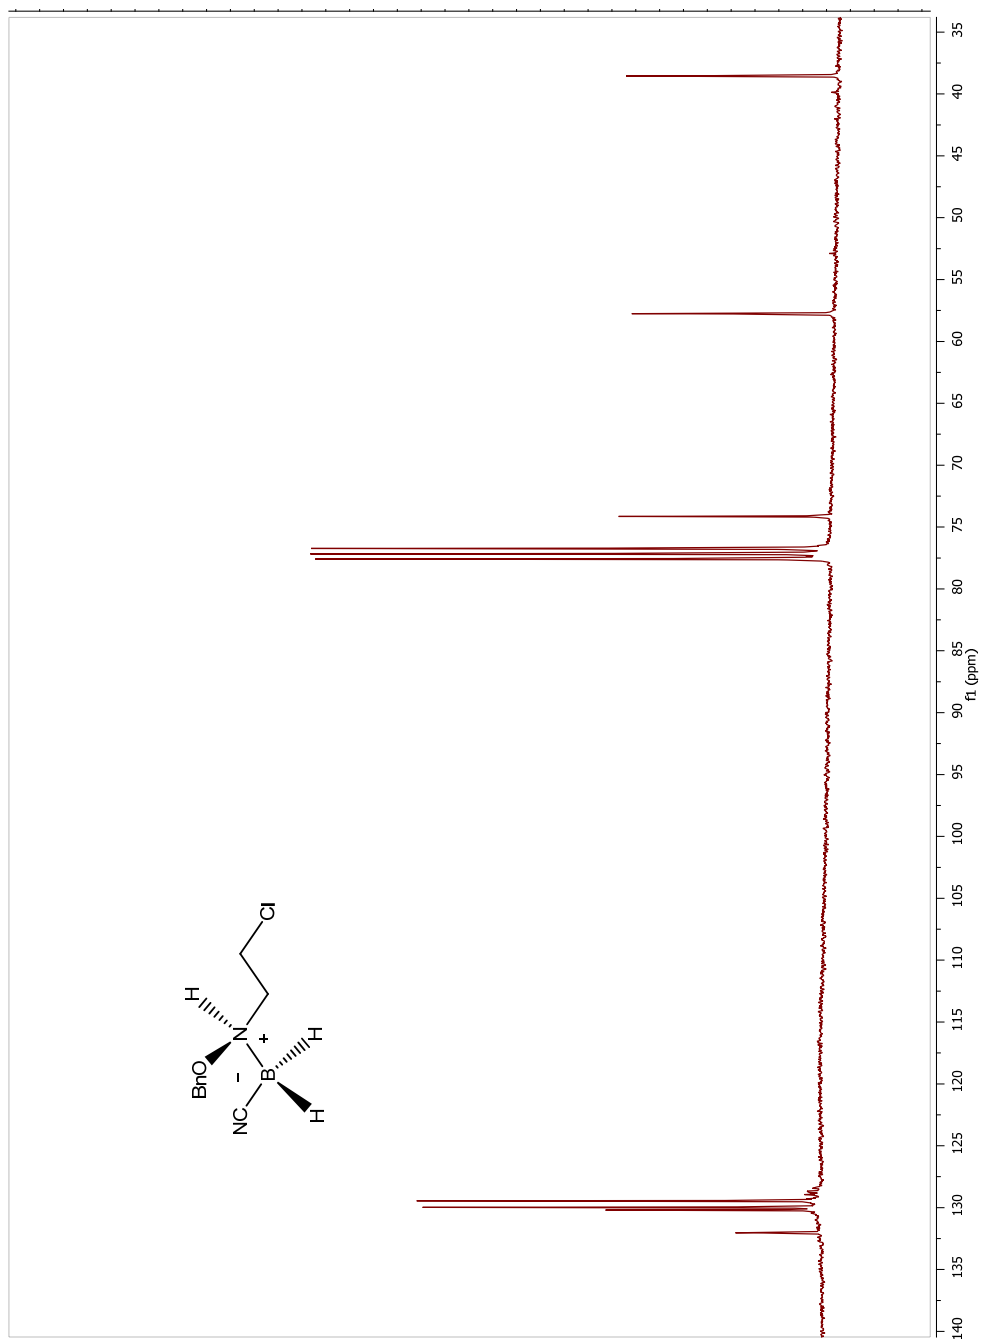

$^{13}\text{C}$ -NMR of 7

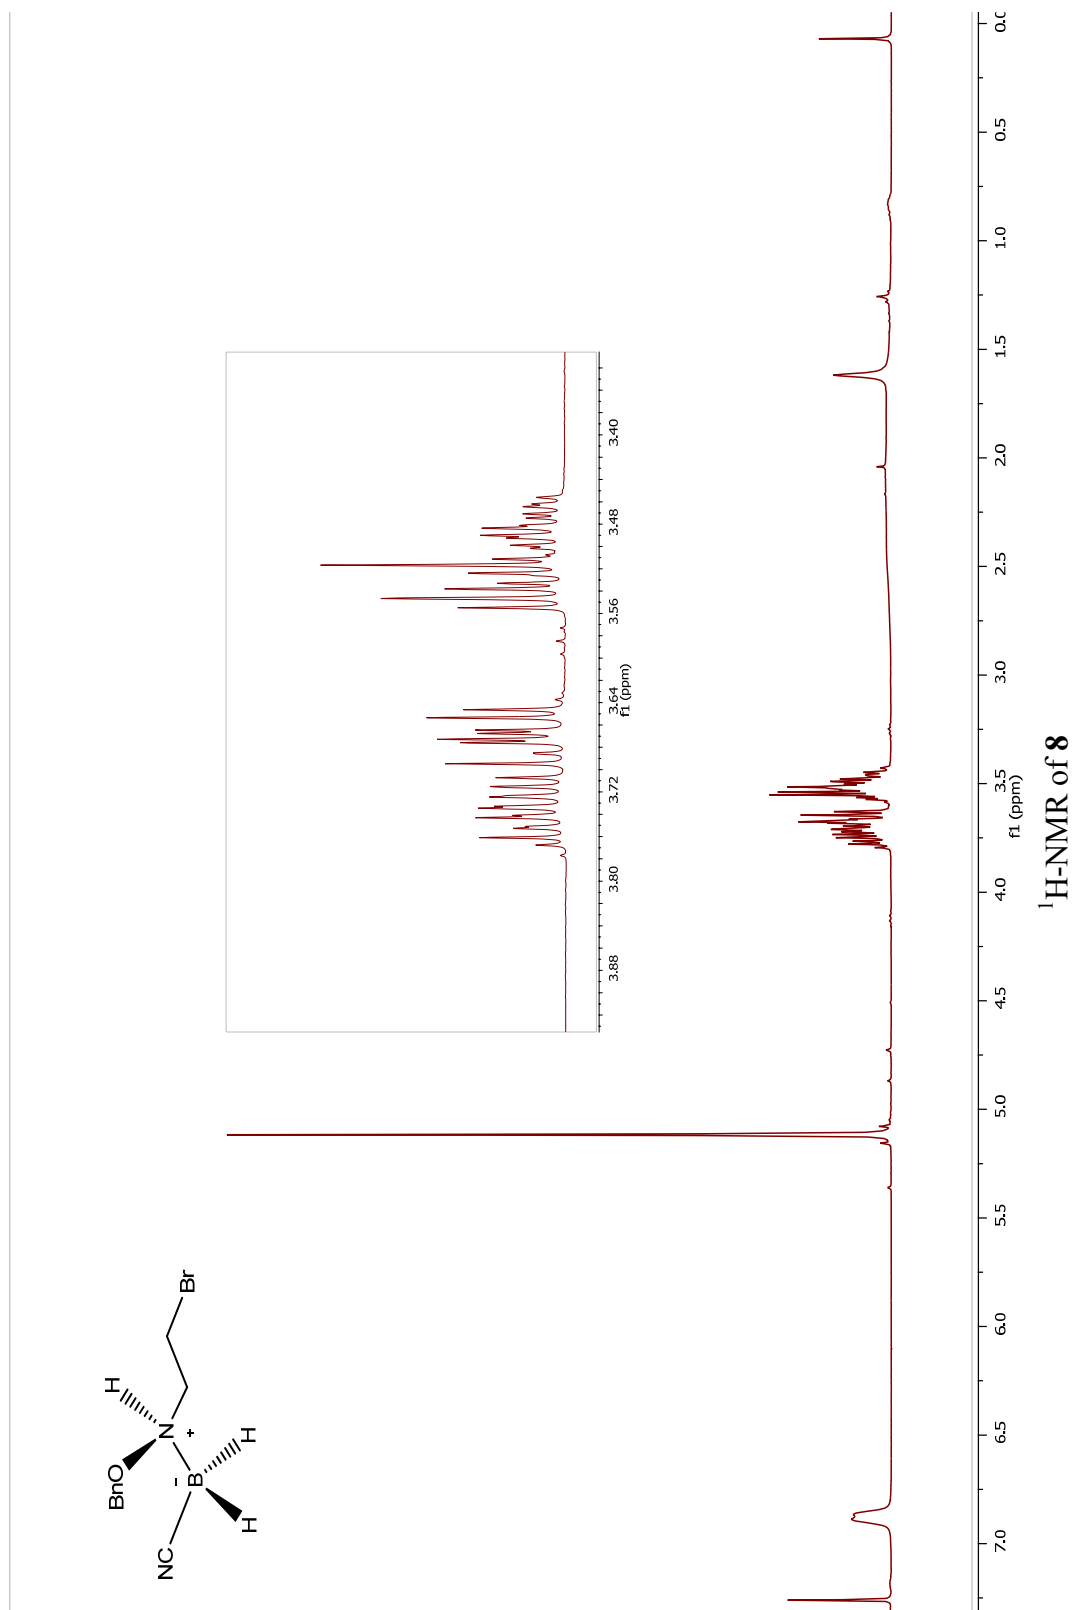

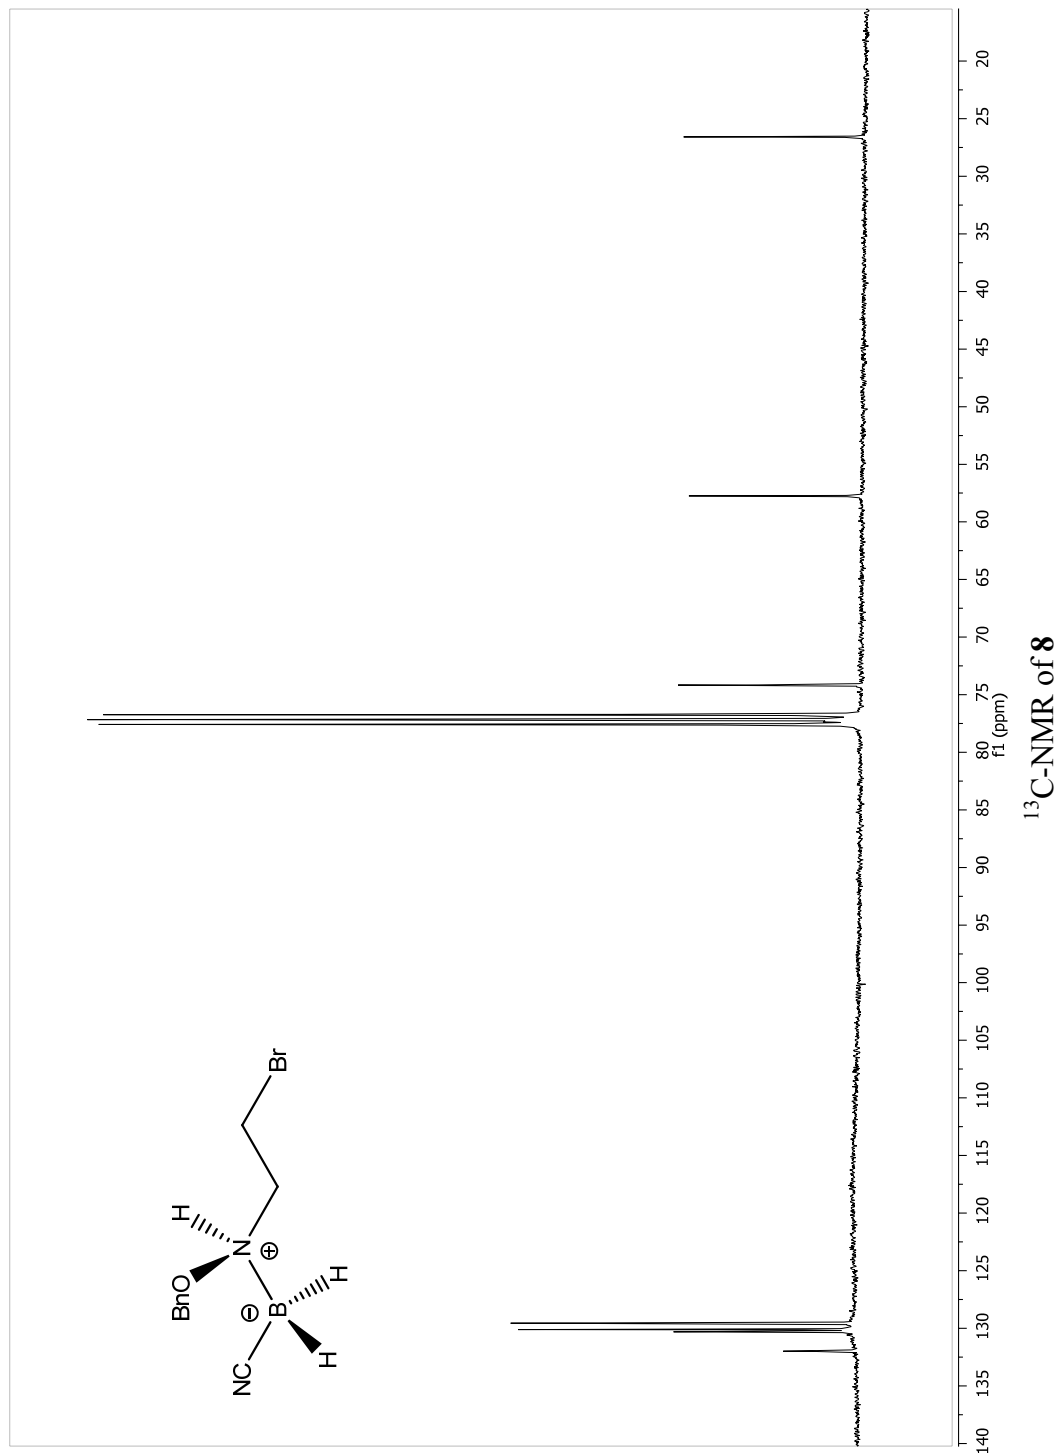

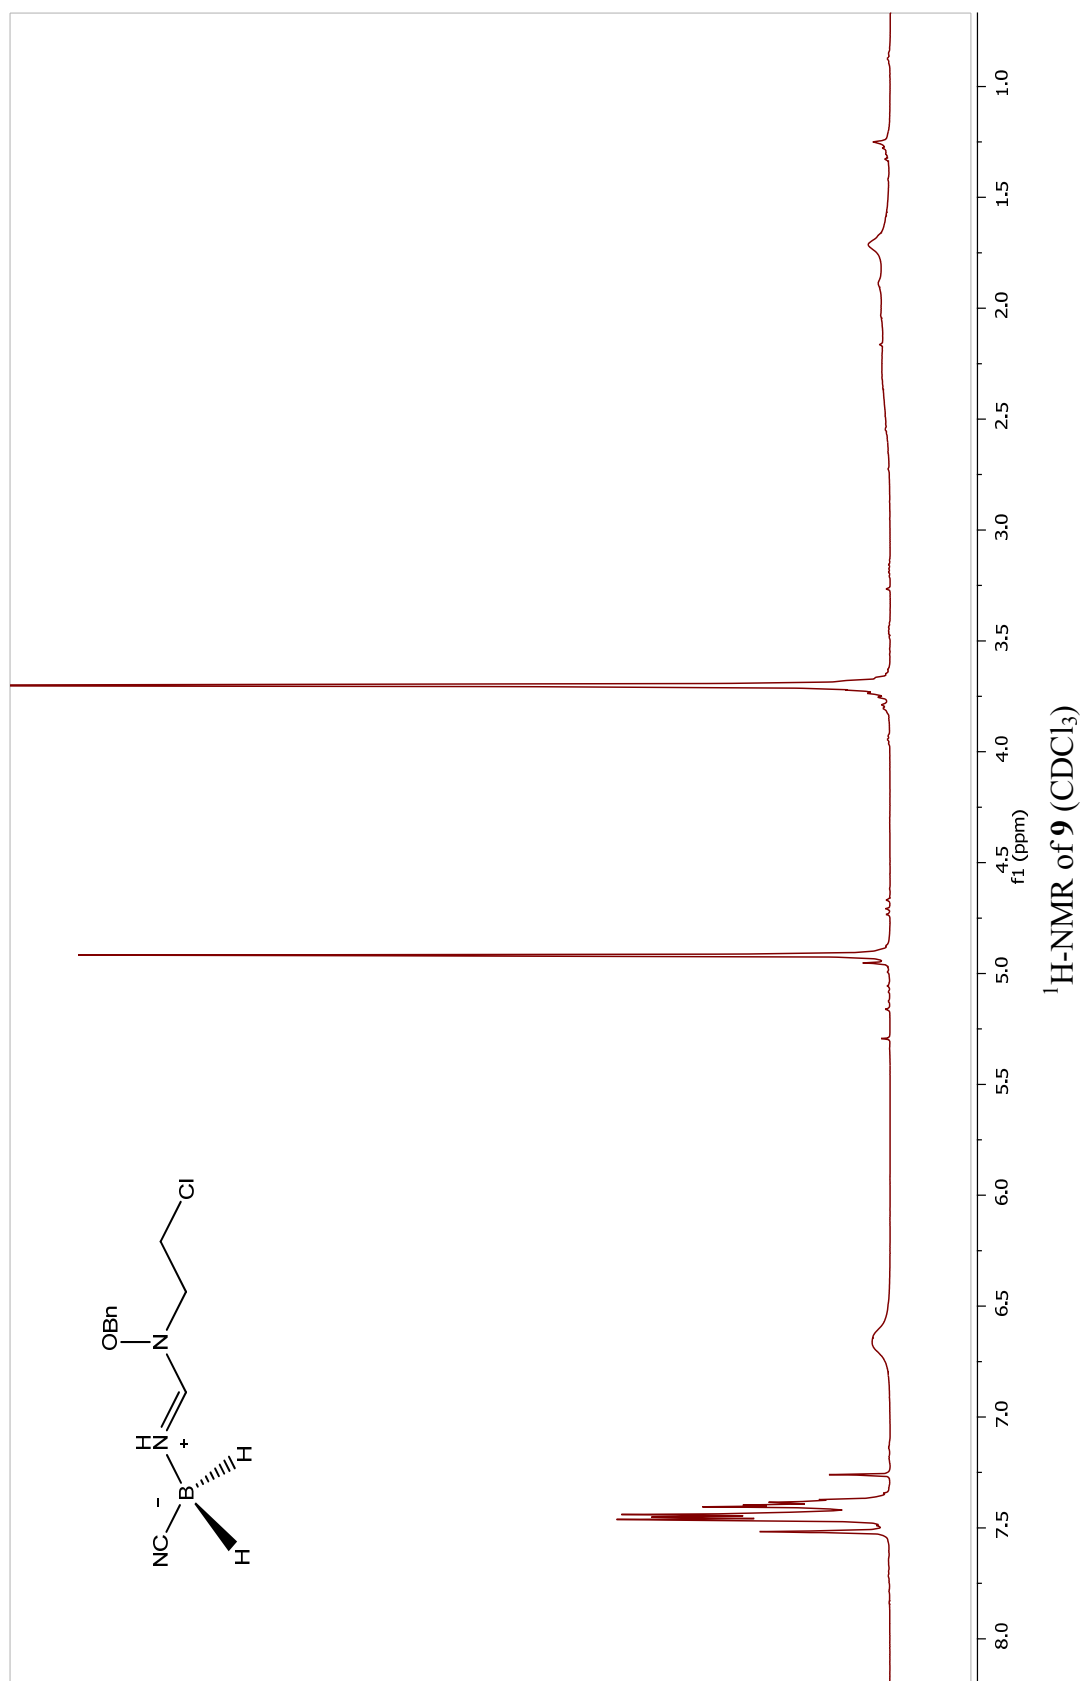

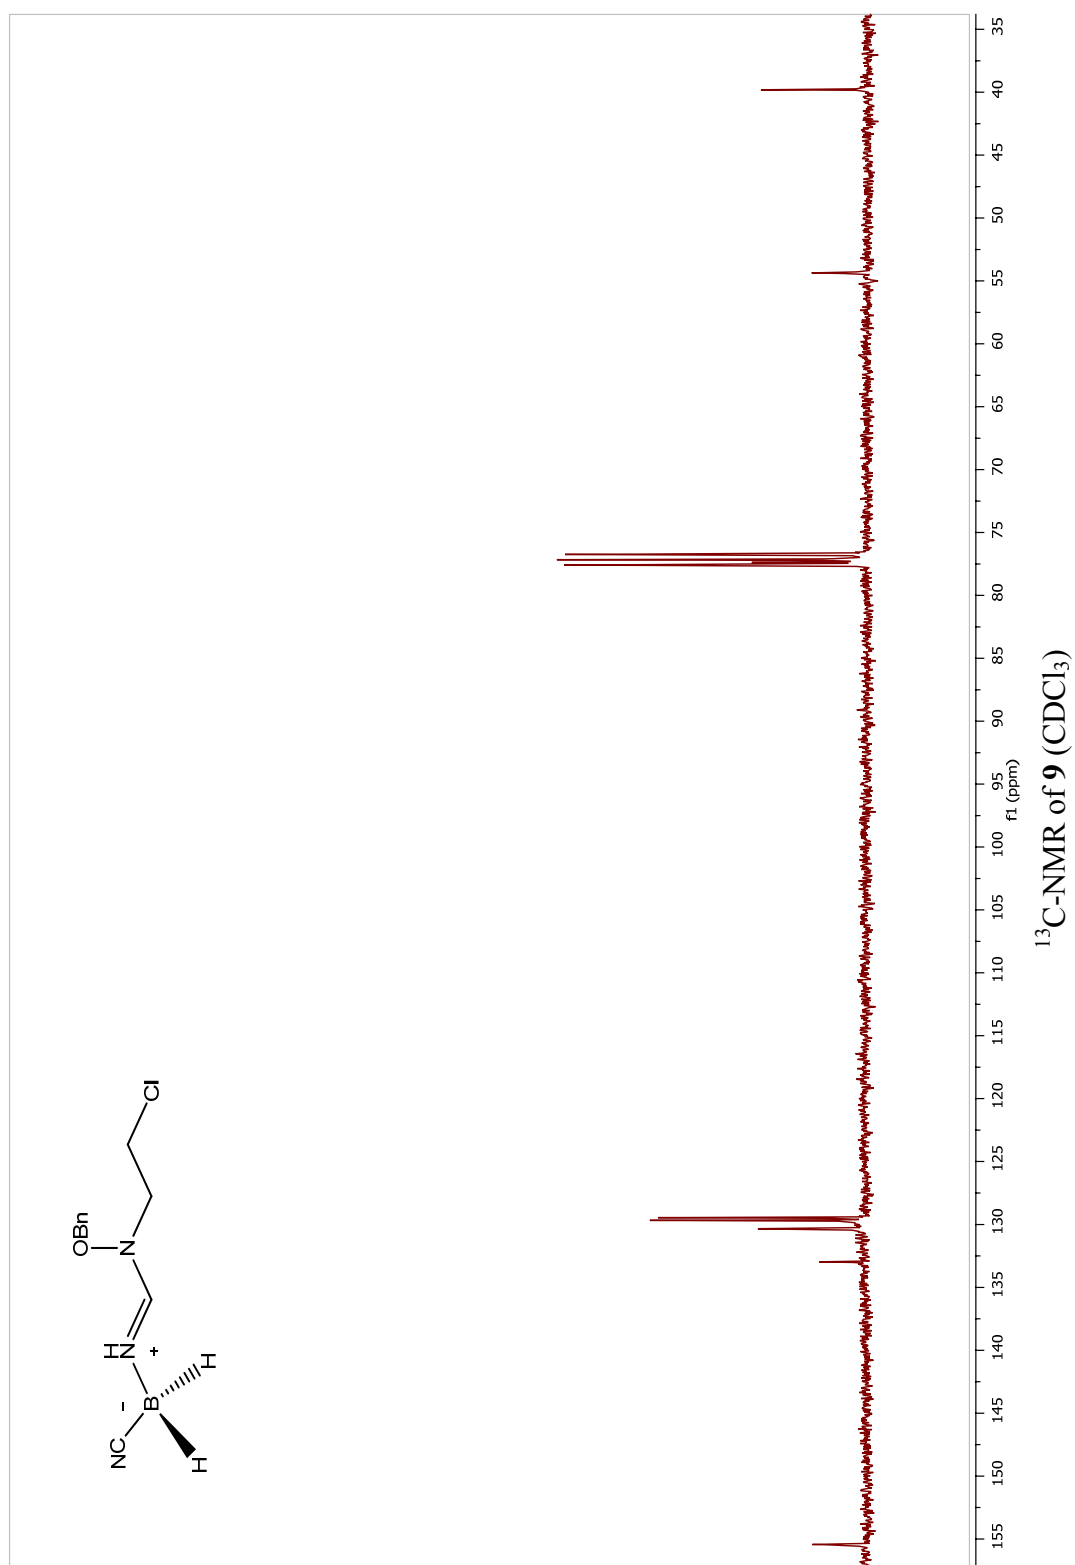

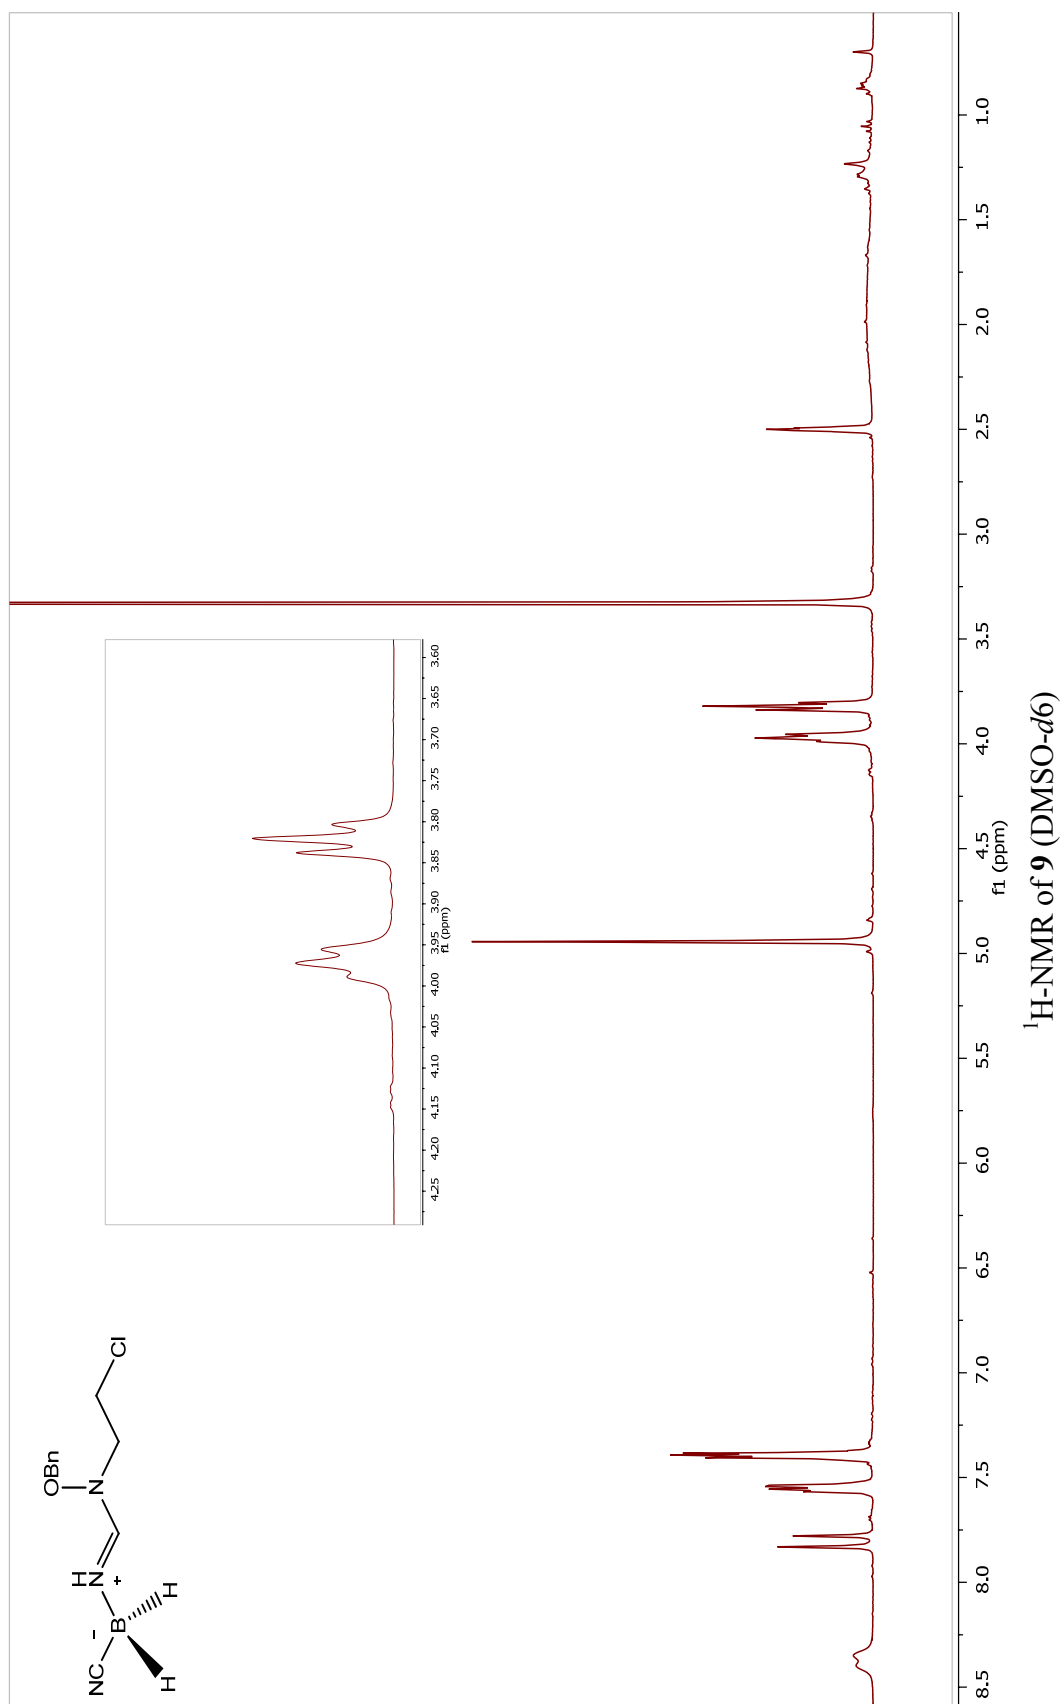

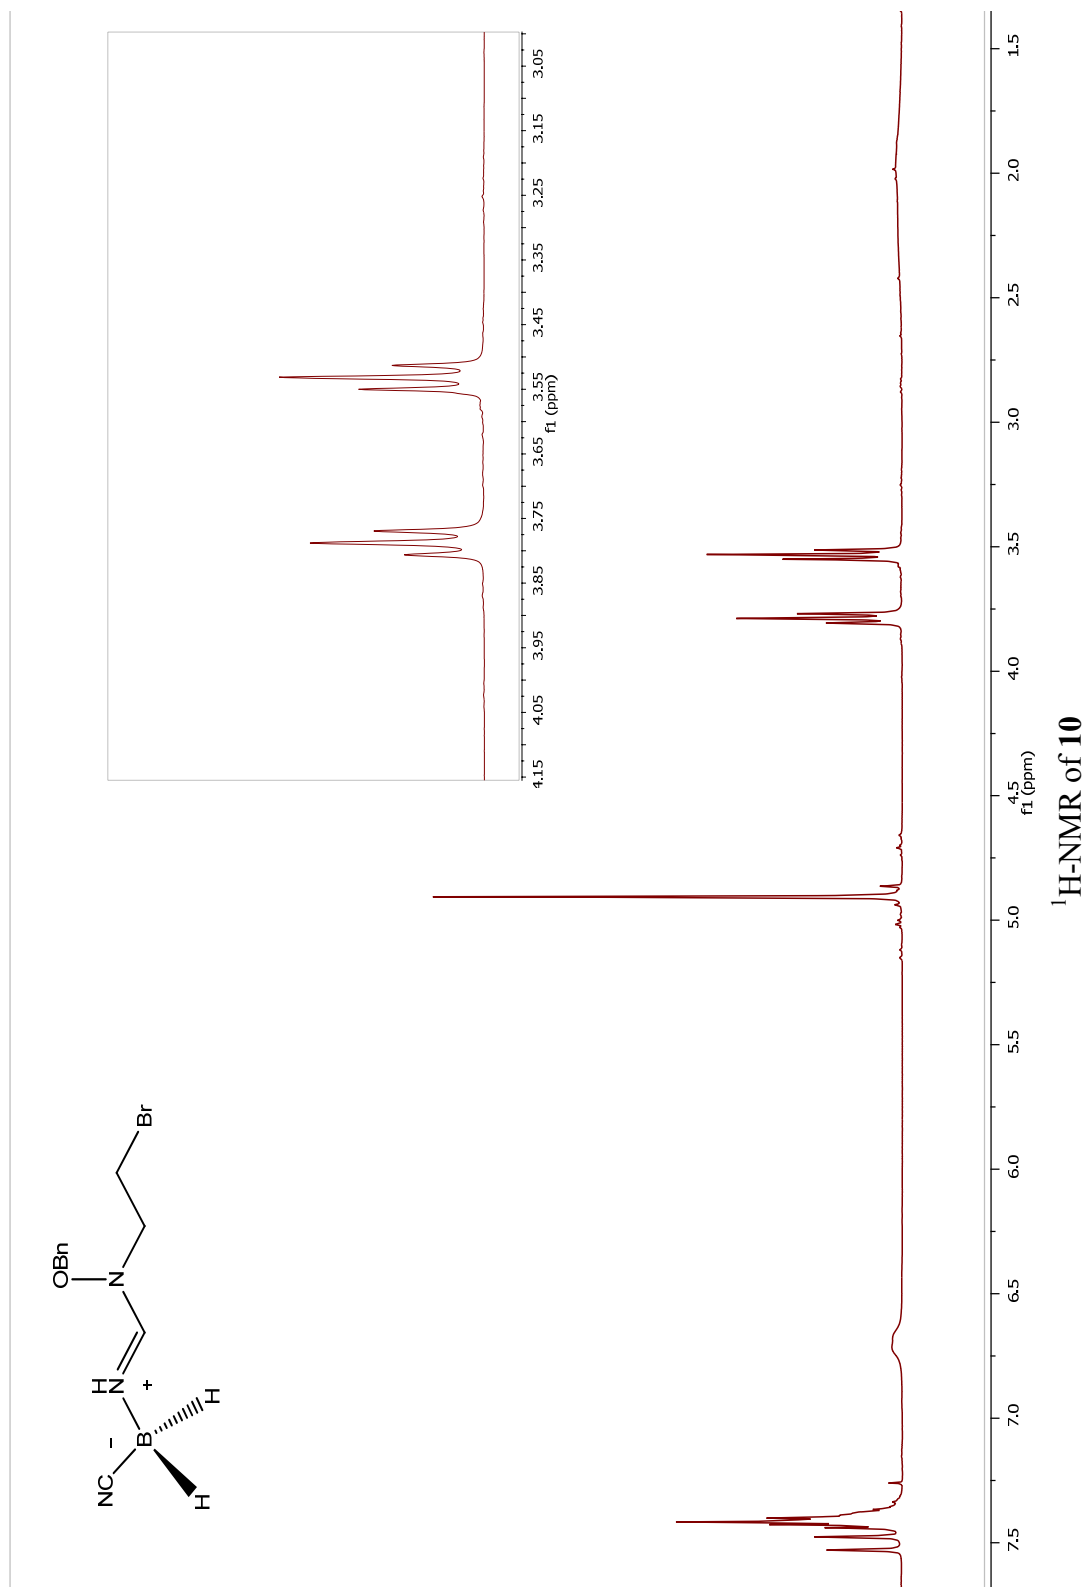



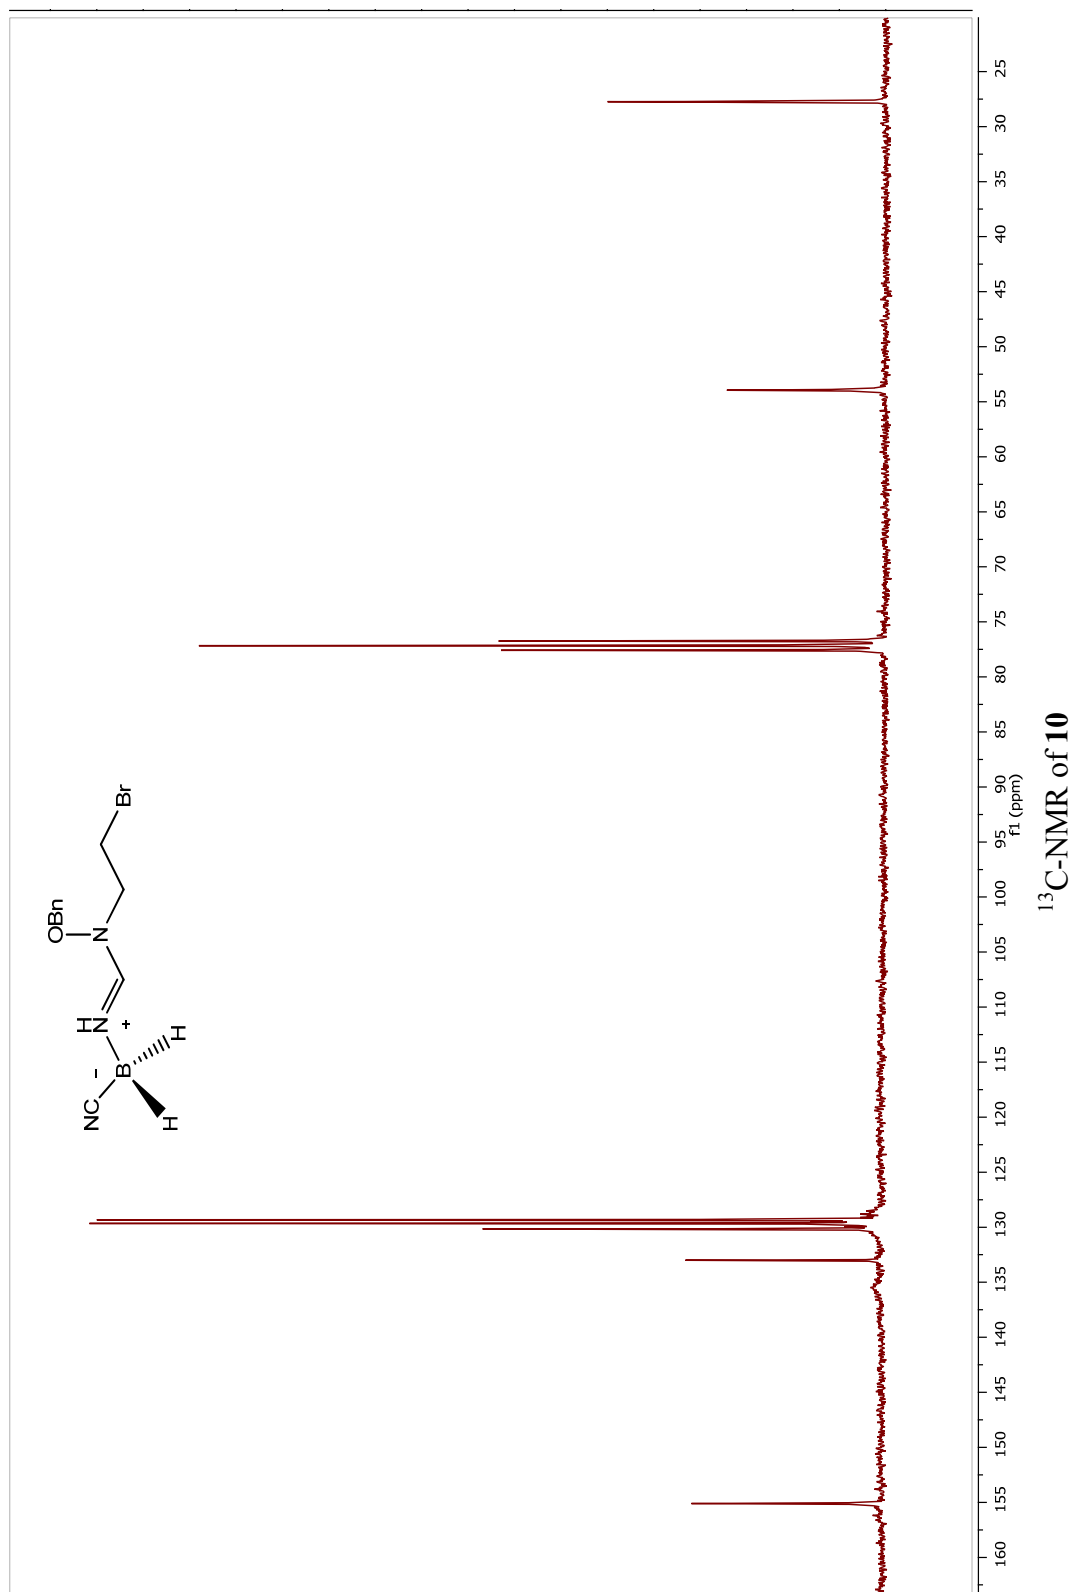

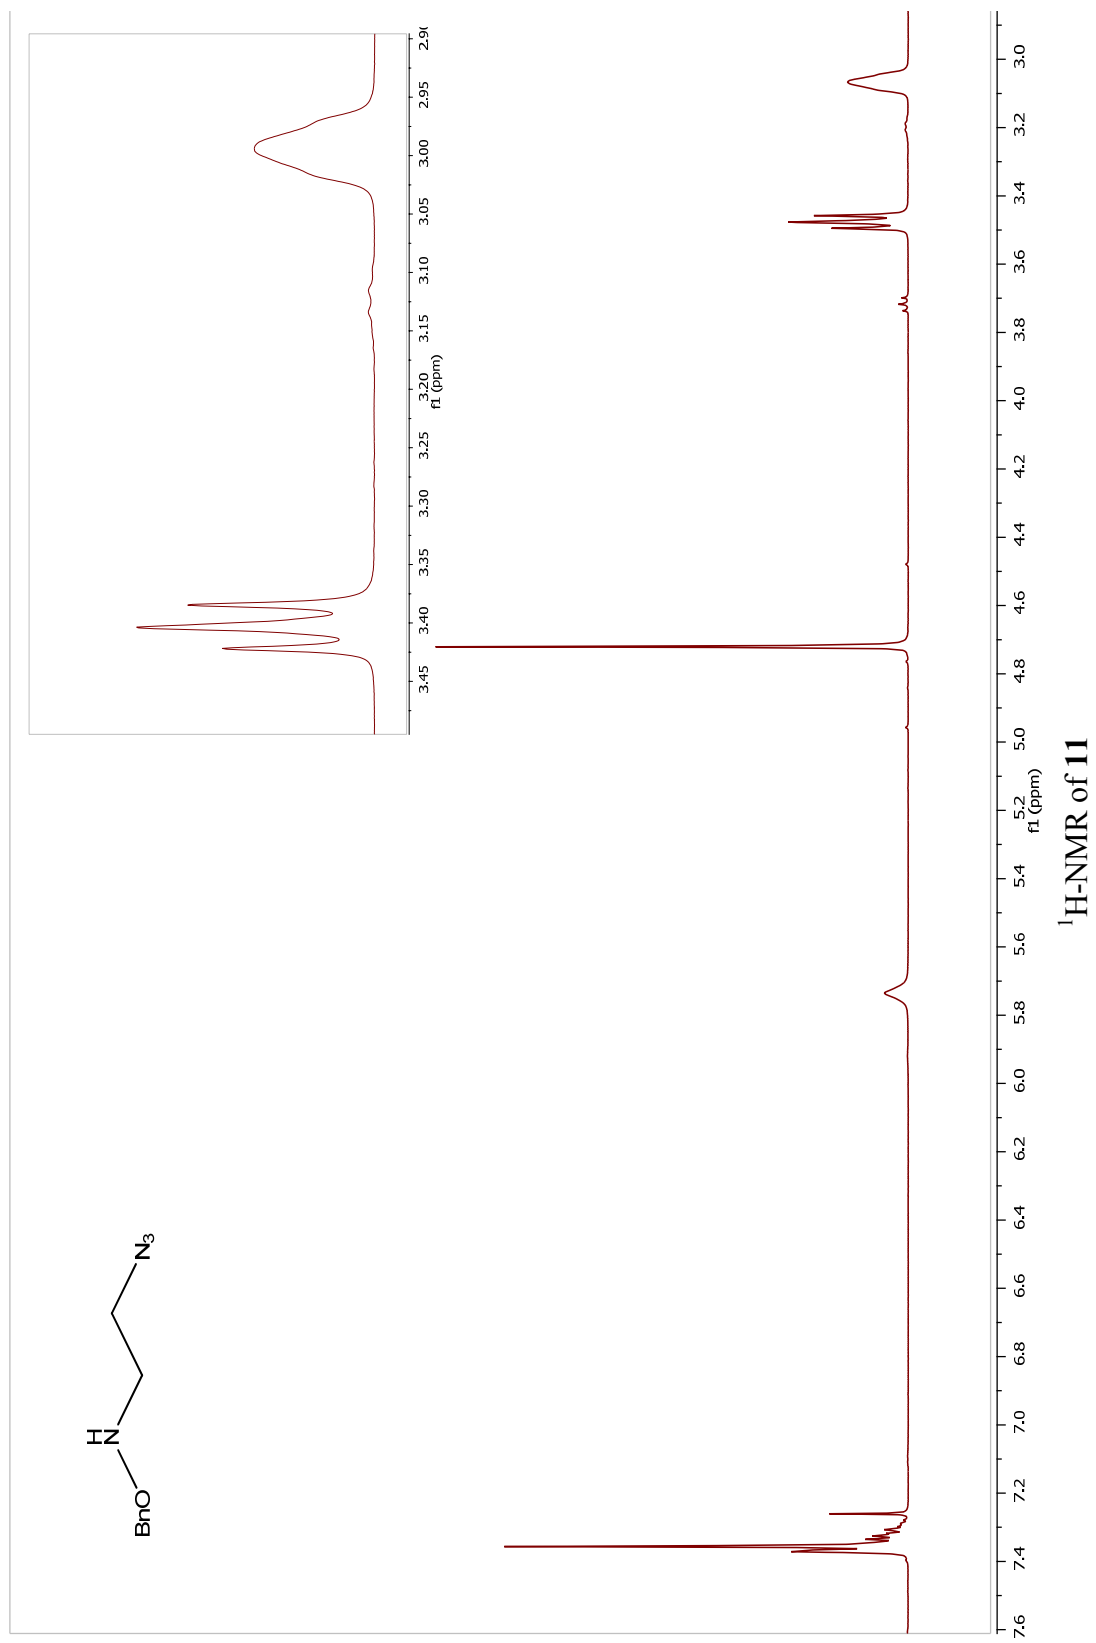

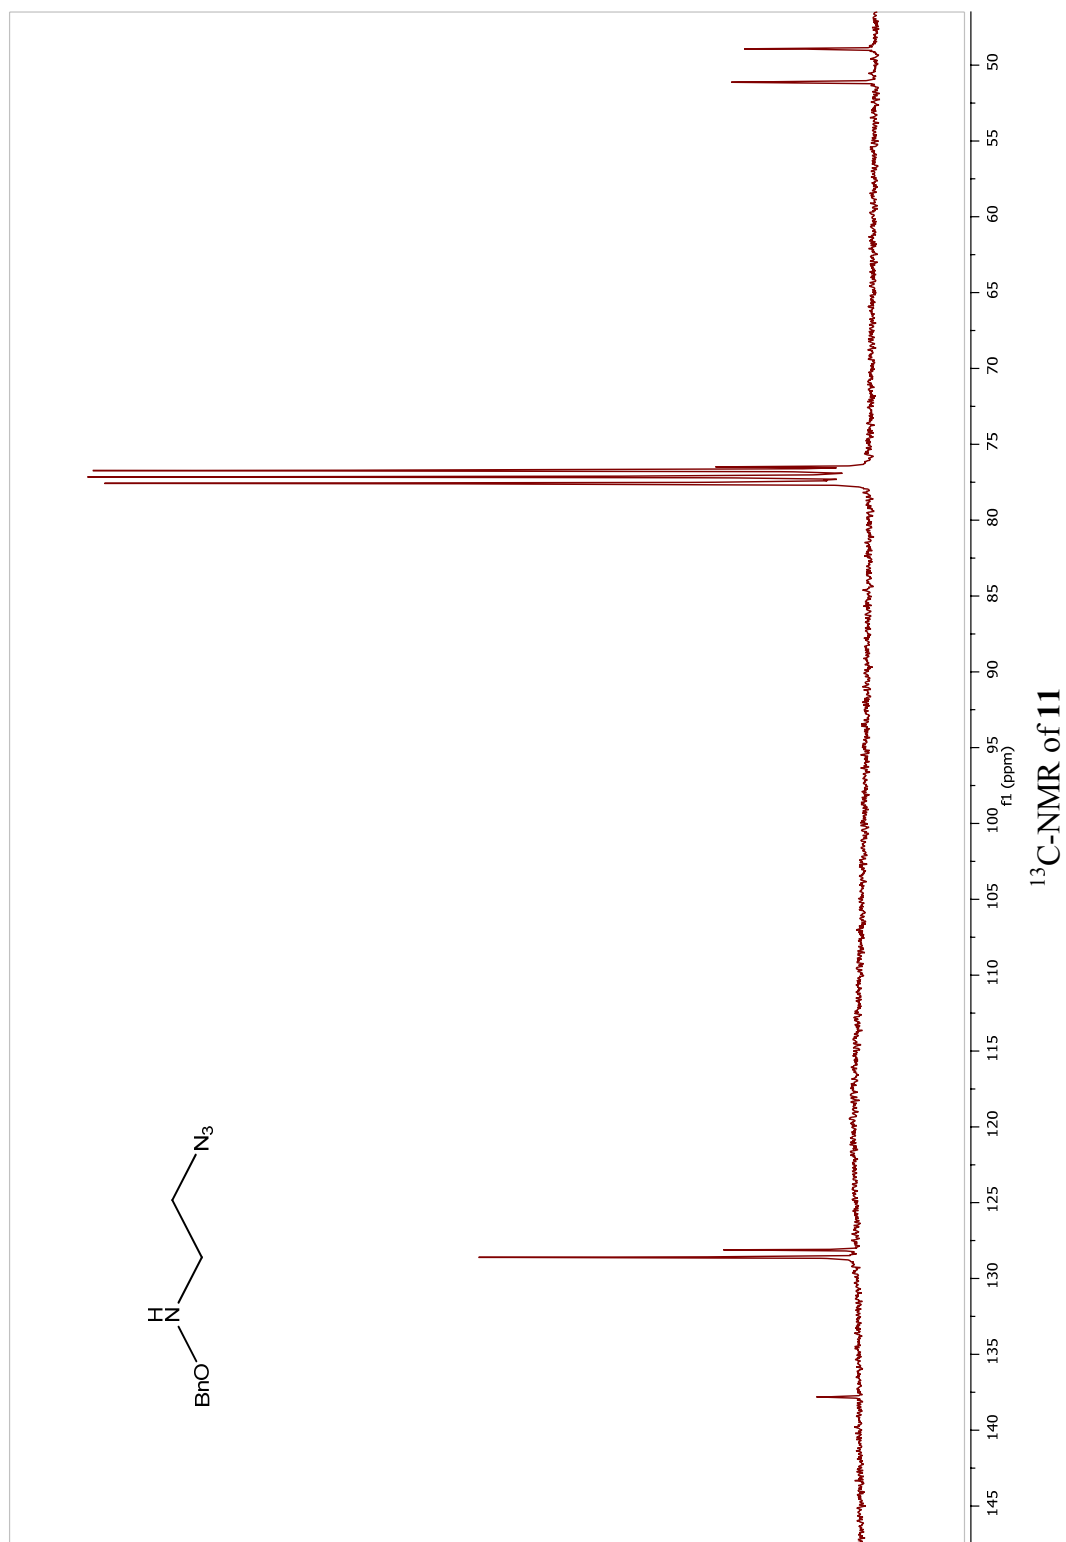

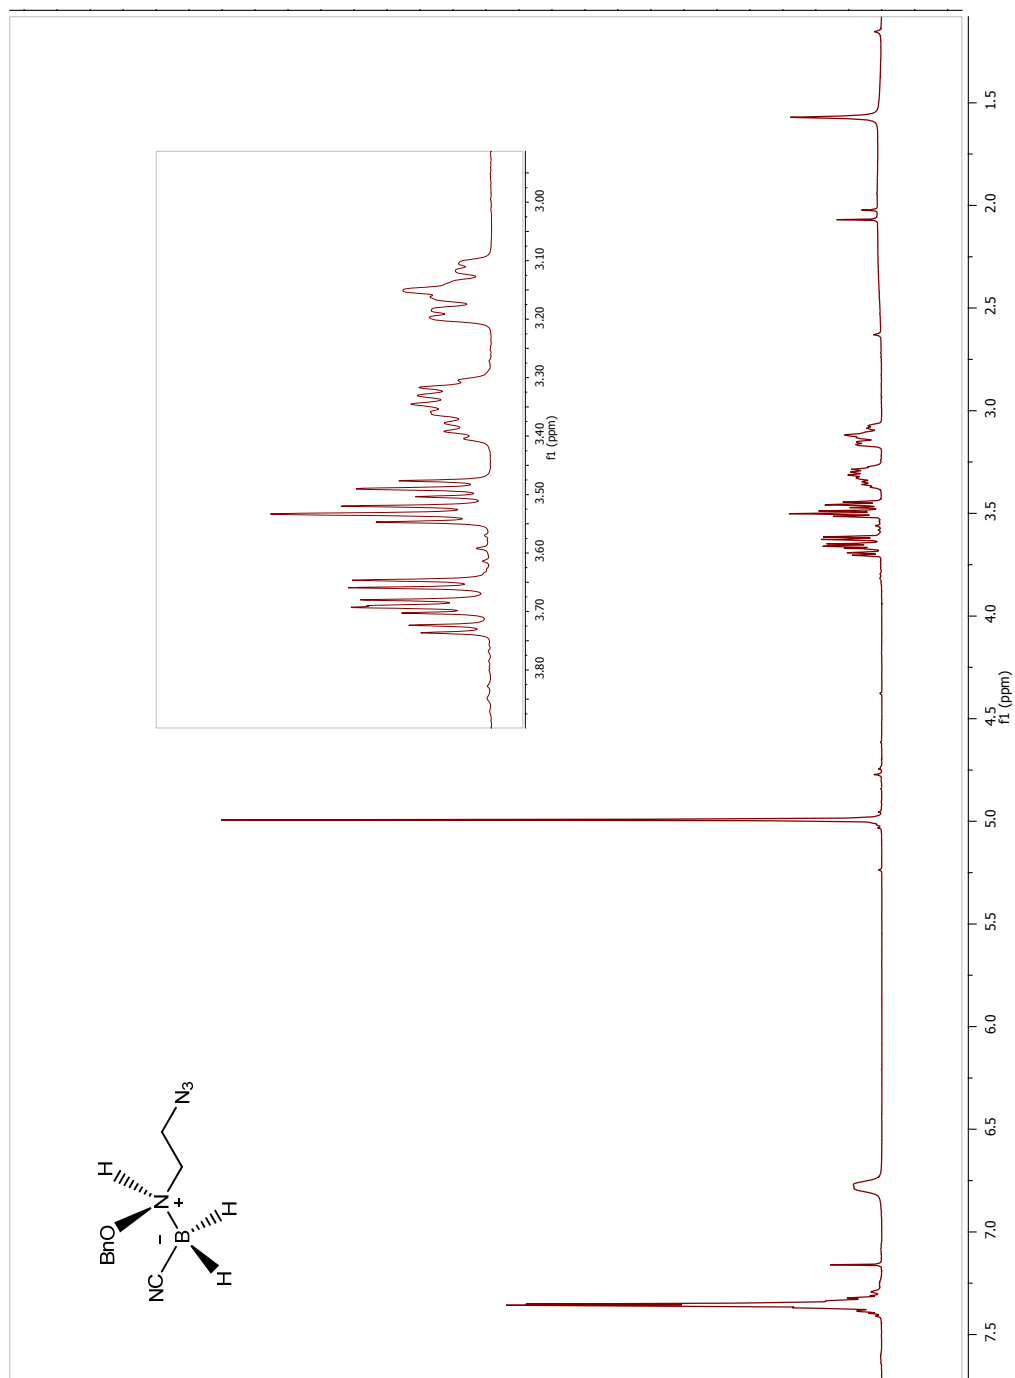

$^1\text{H-NMR}$  of **12**

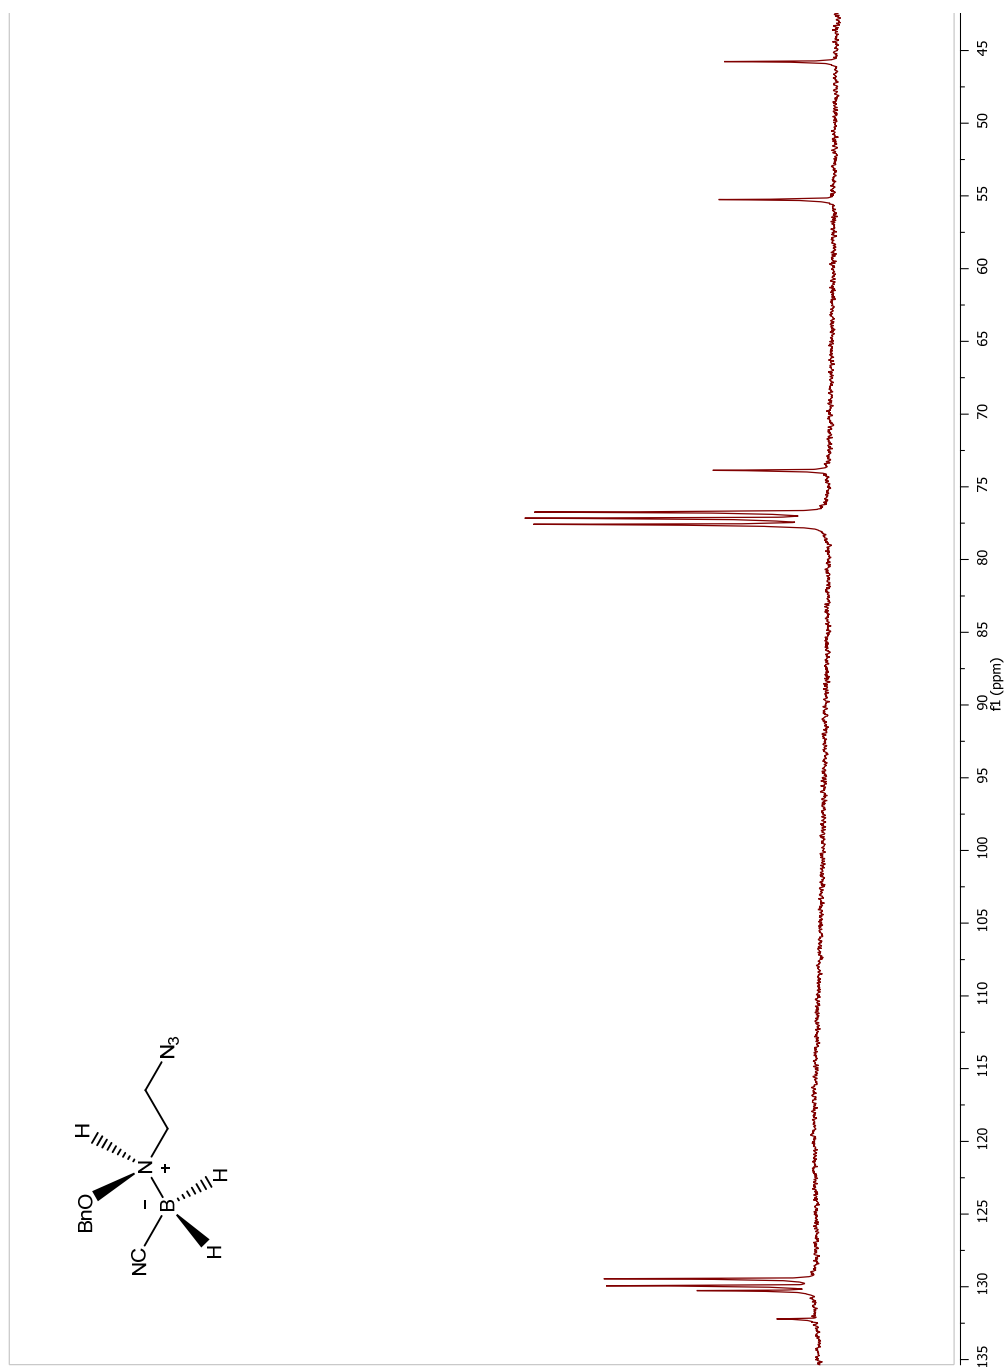

$^{13}\text{C}$ -NMR of **12**

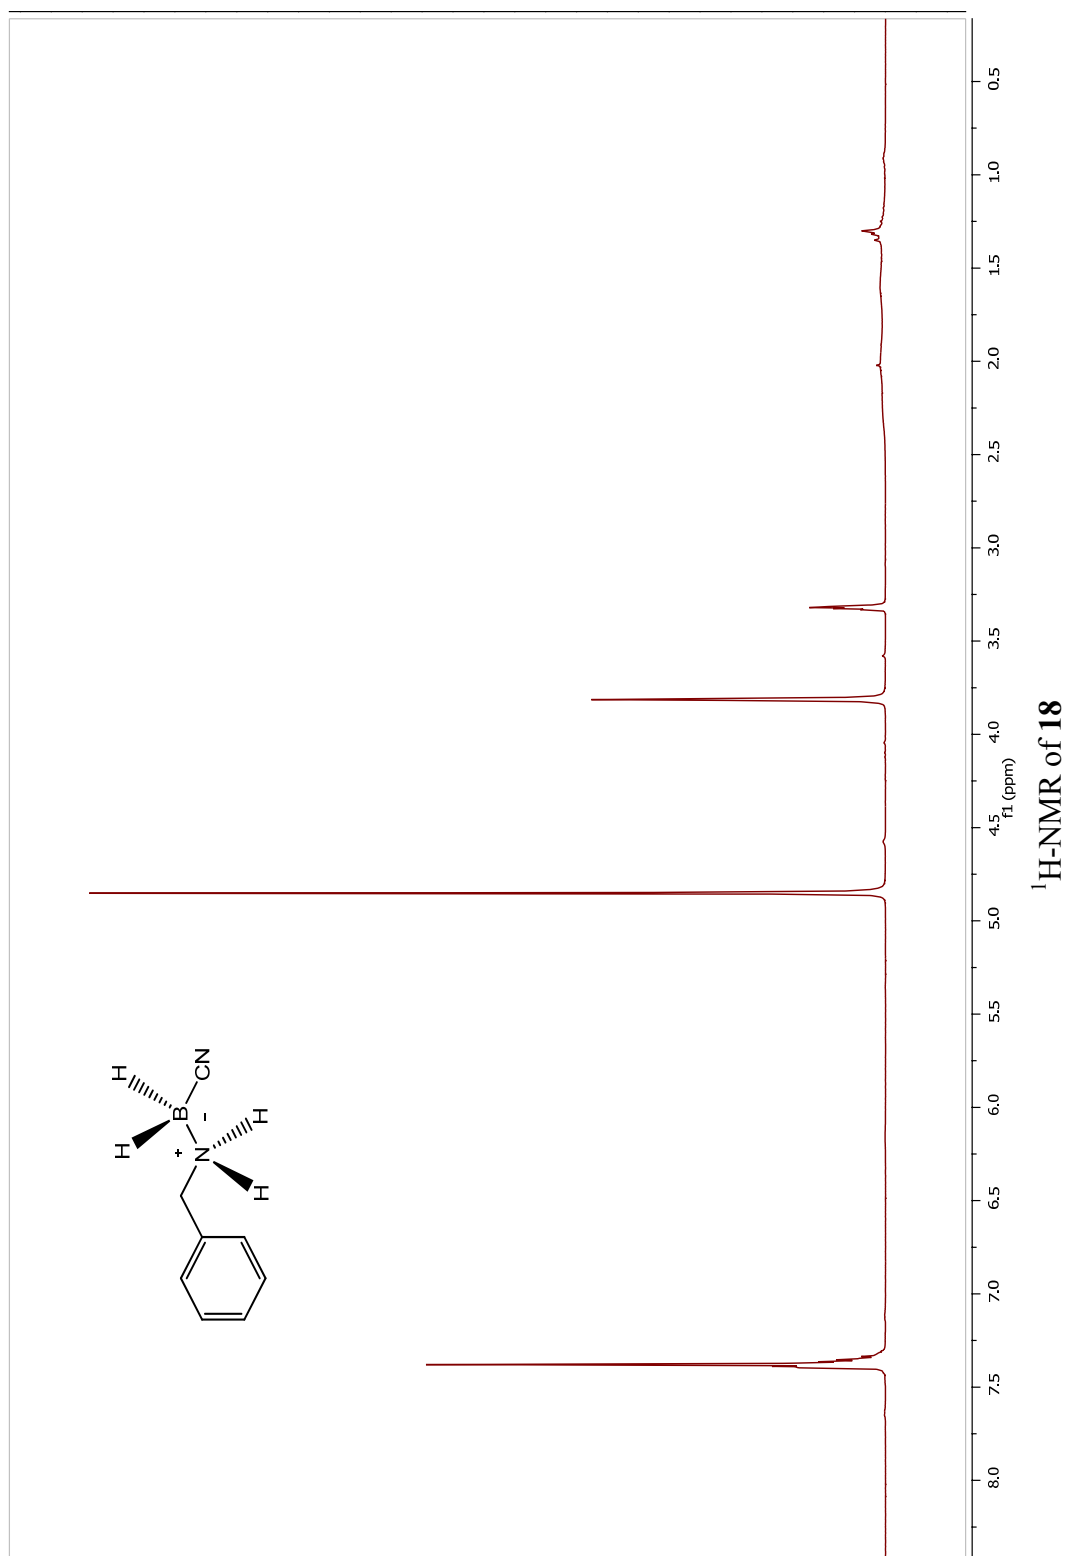

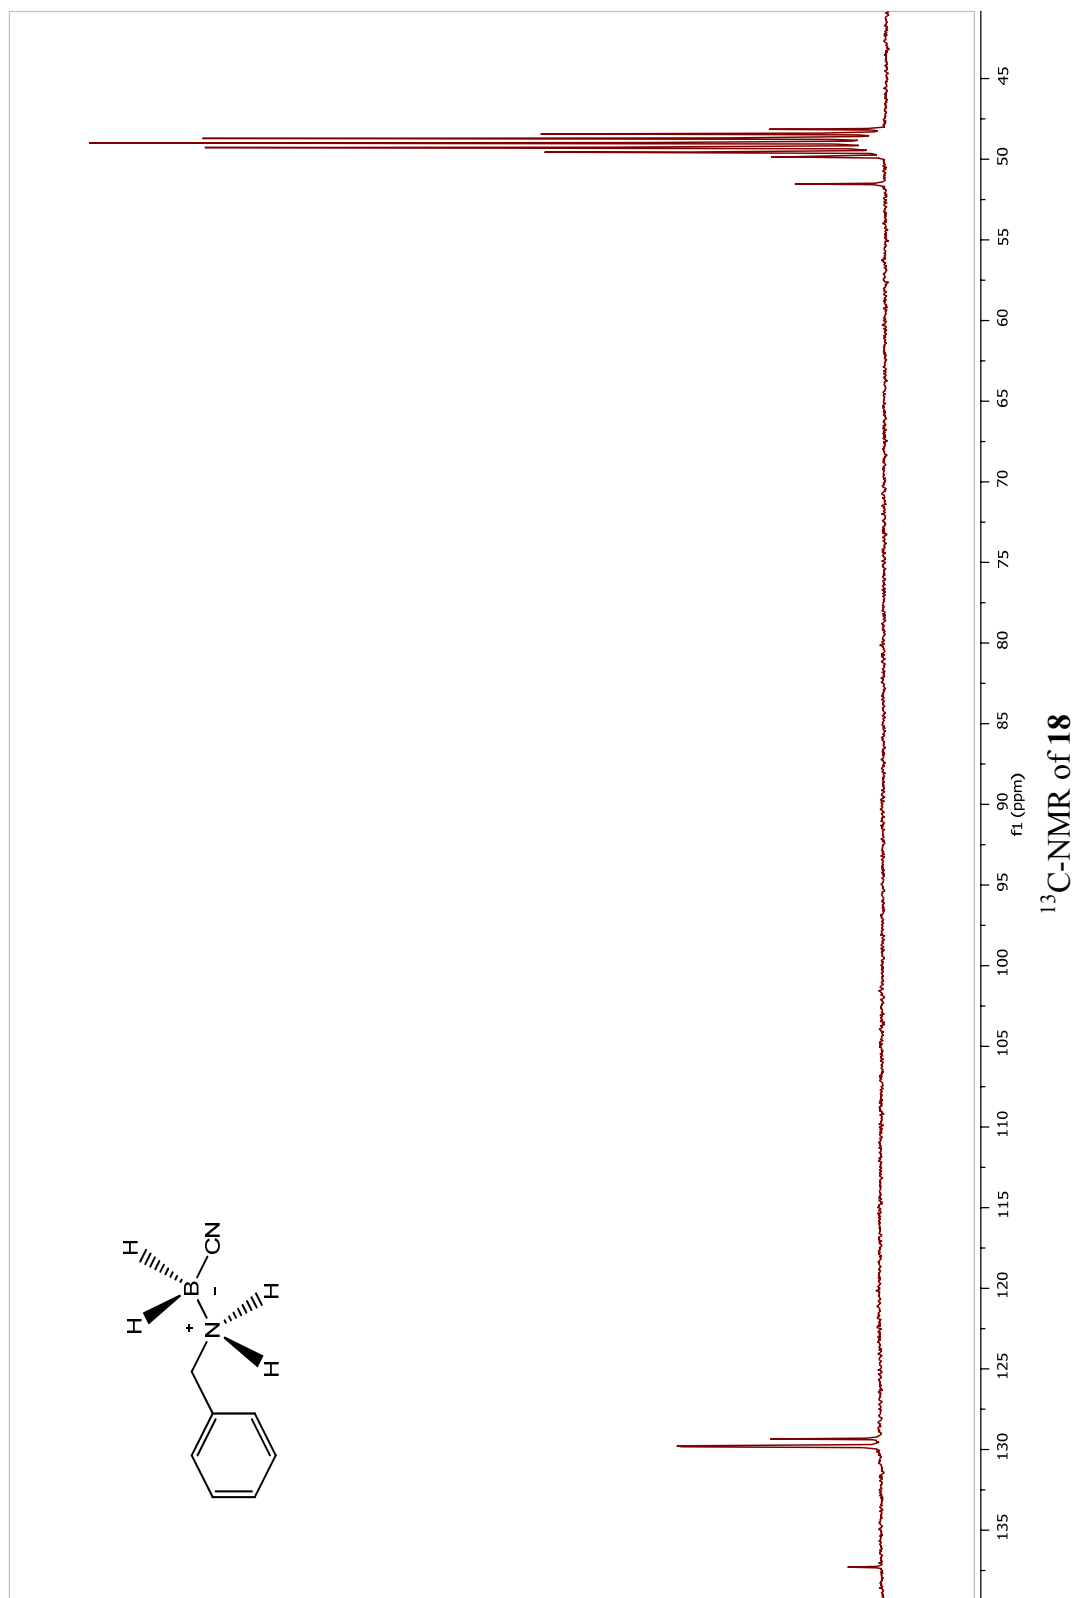

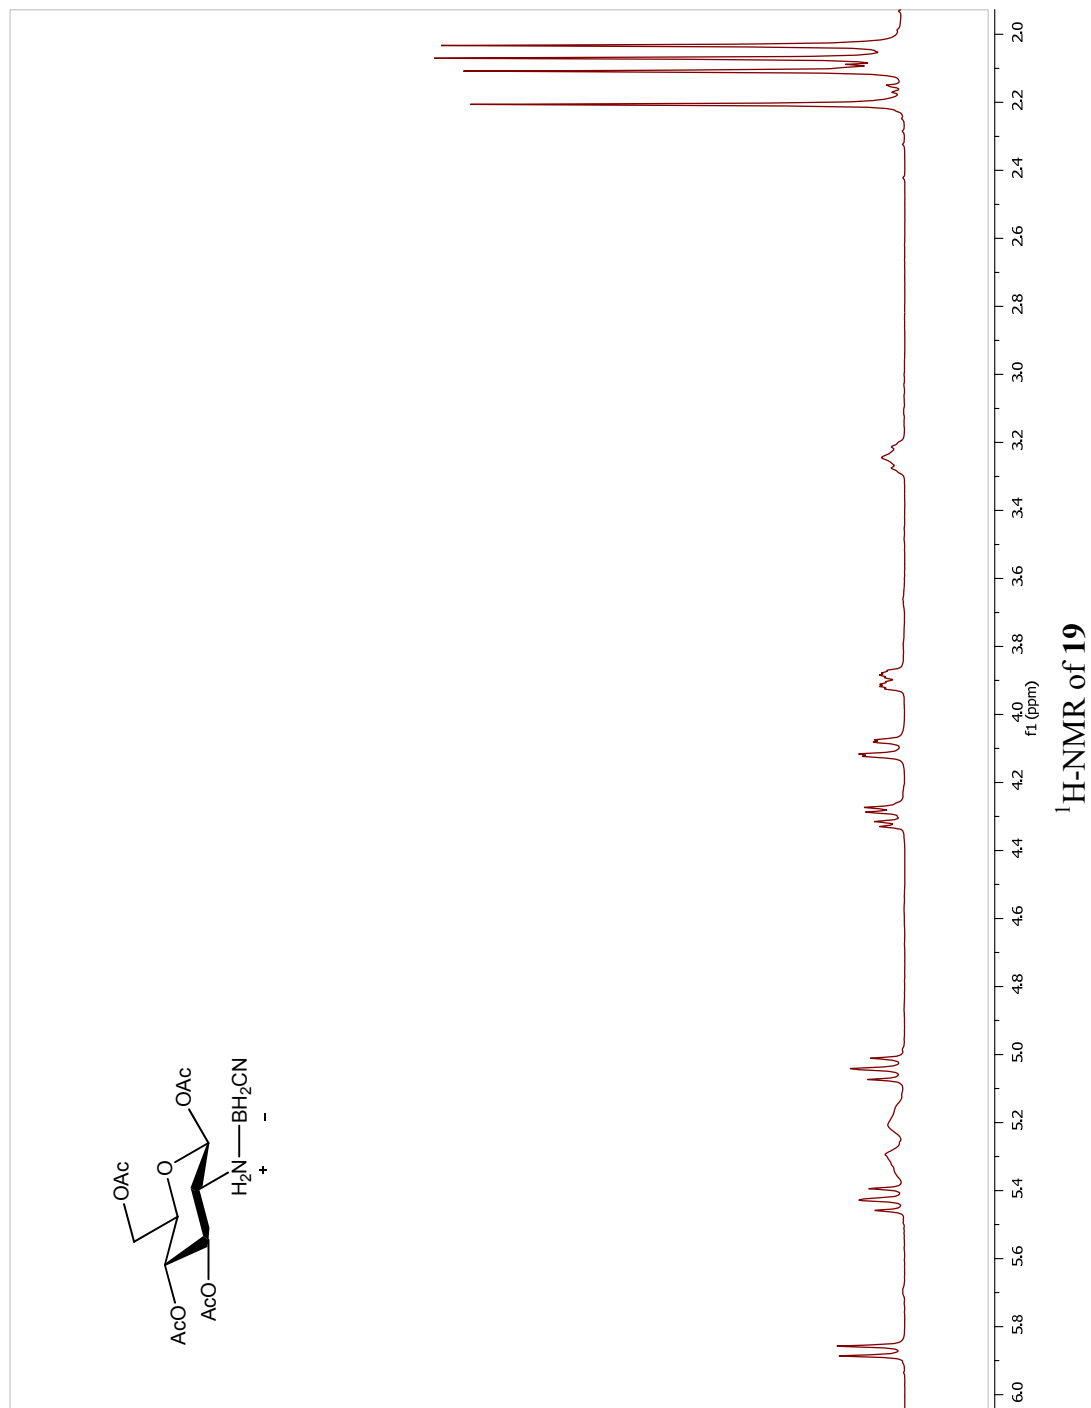



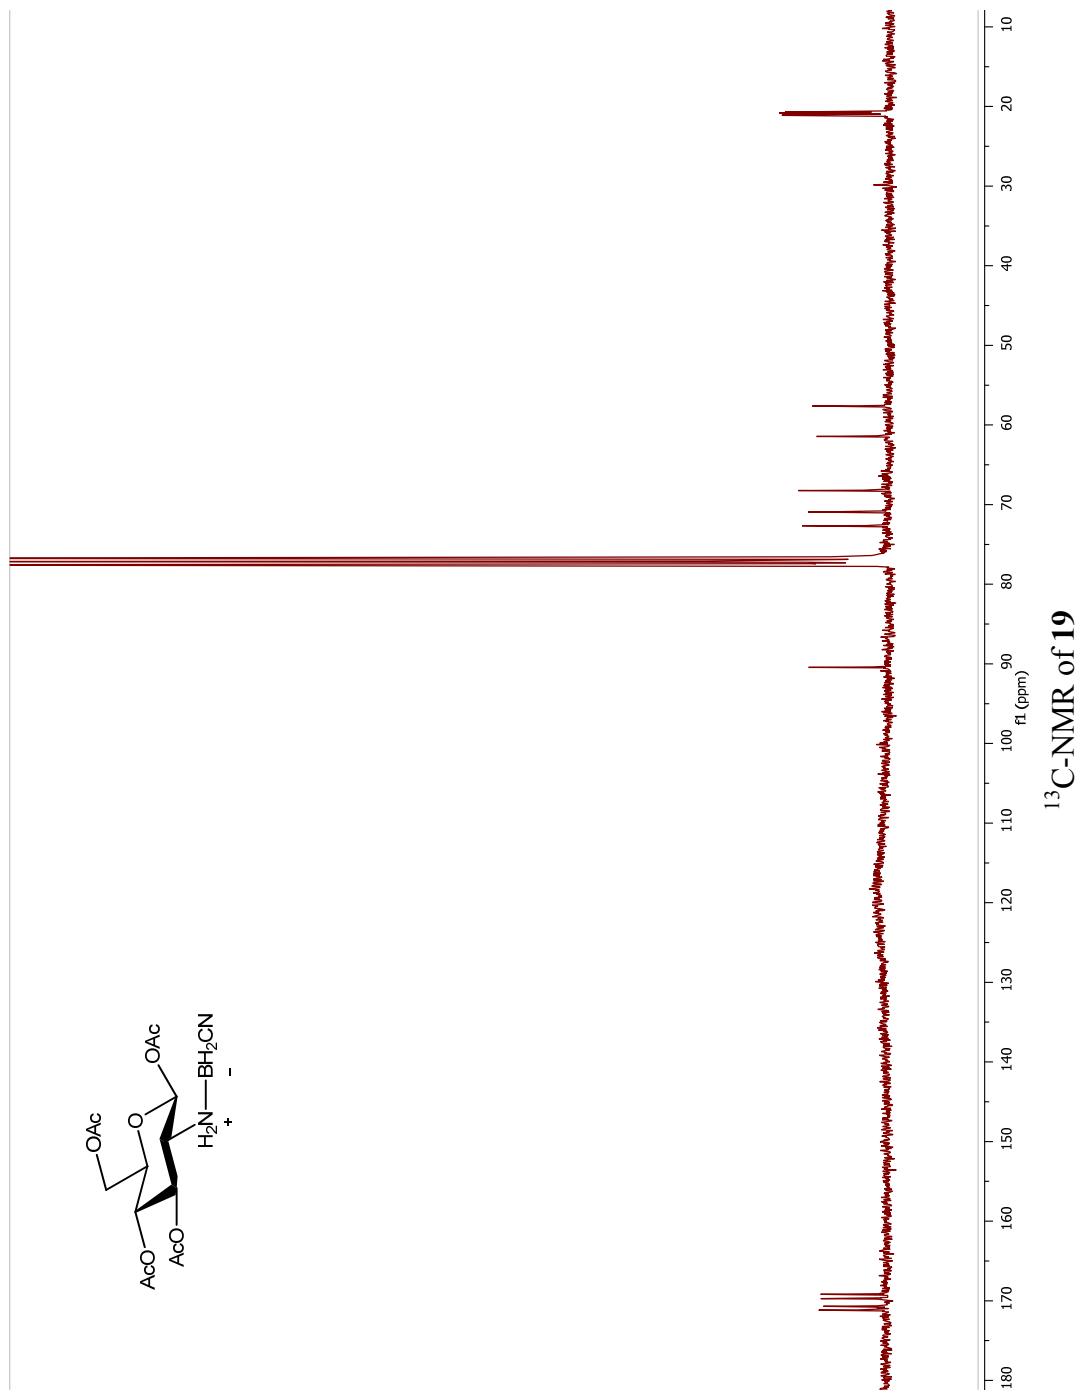

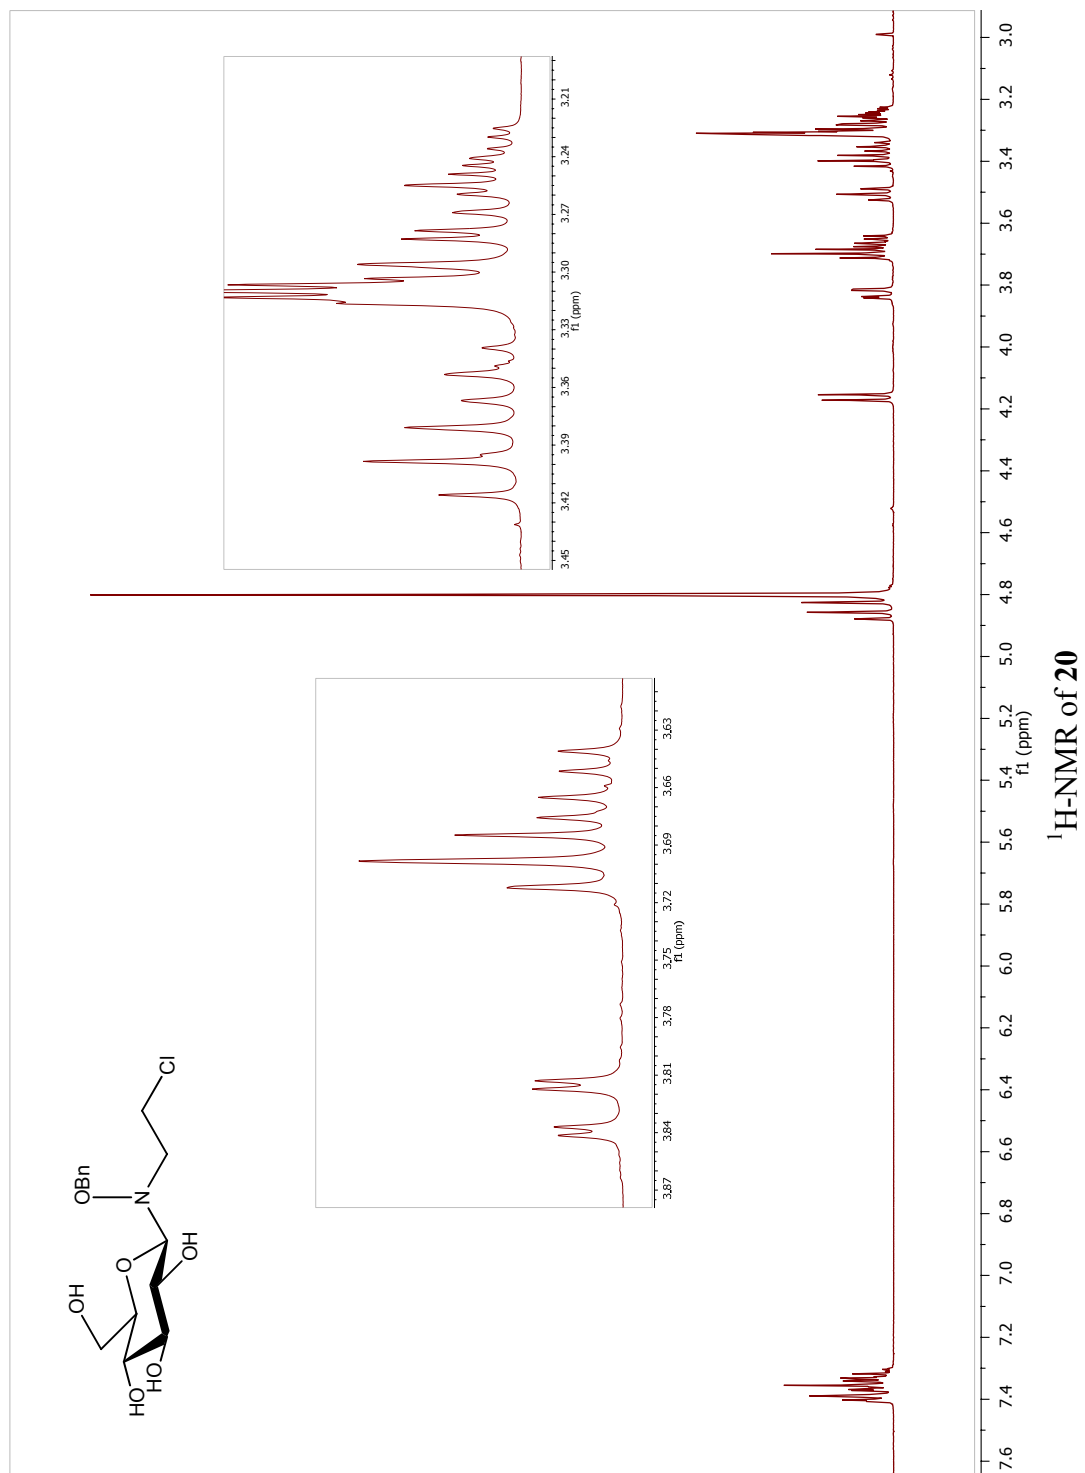

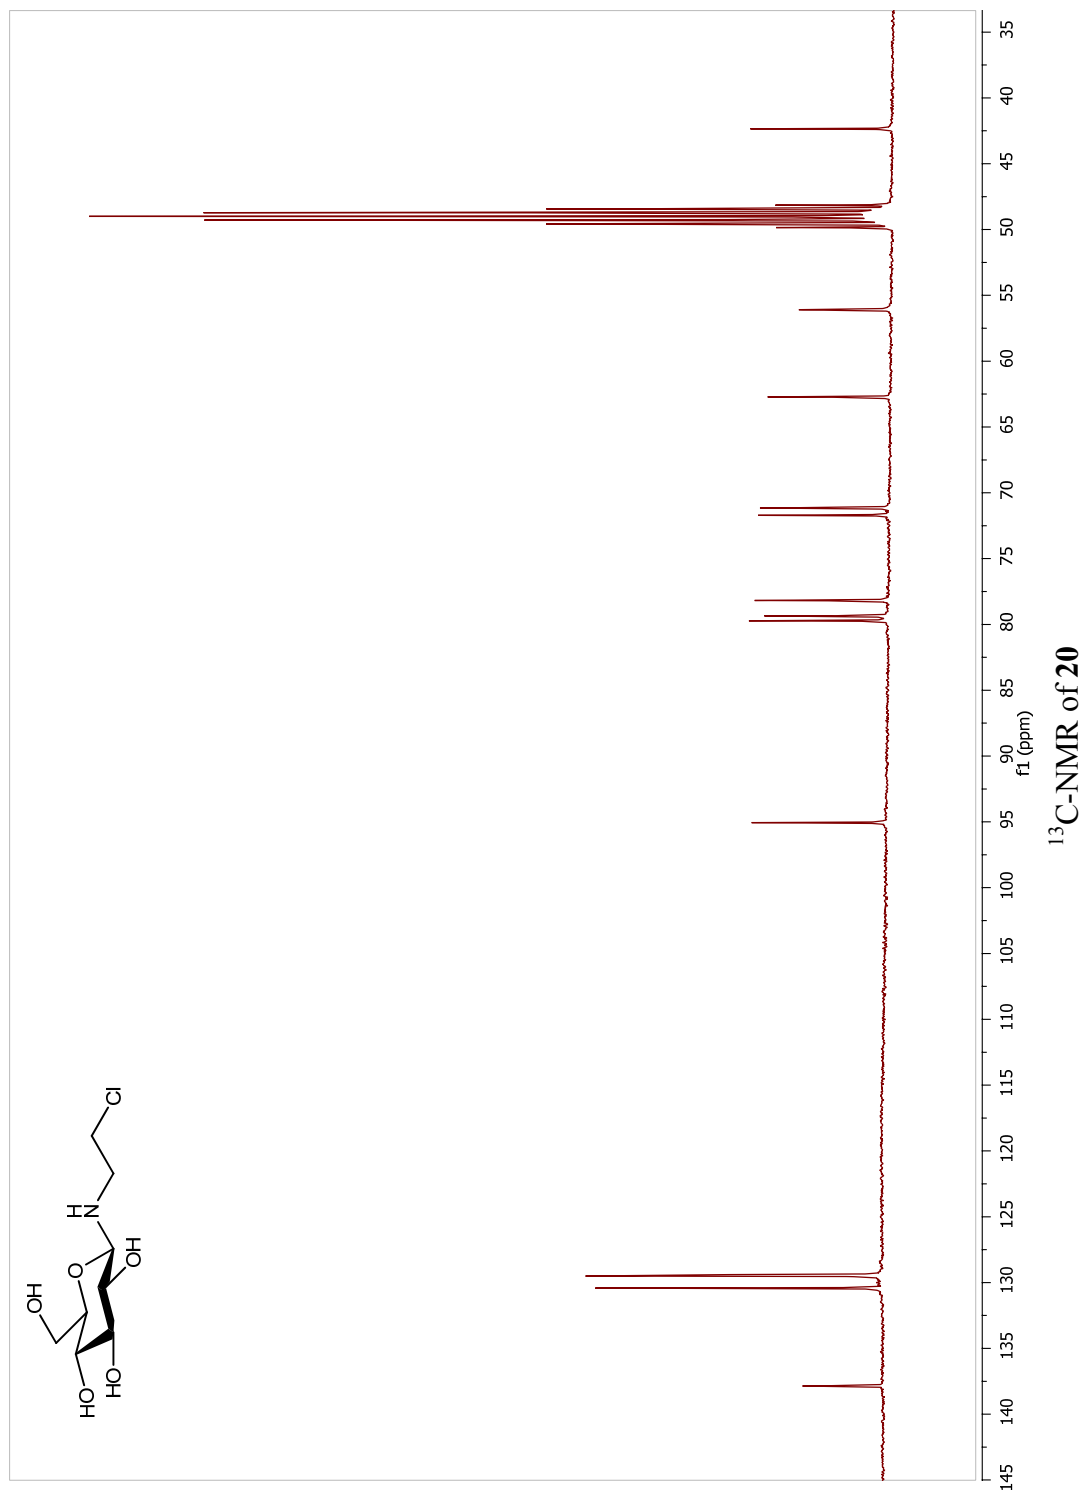

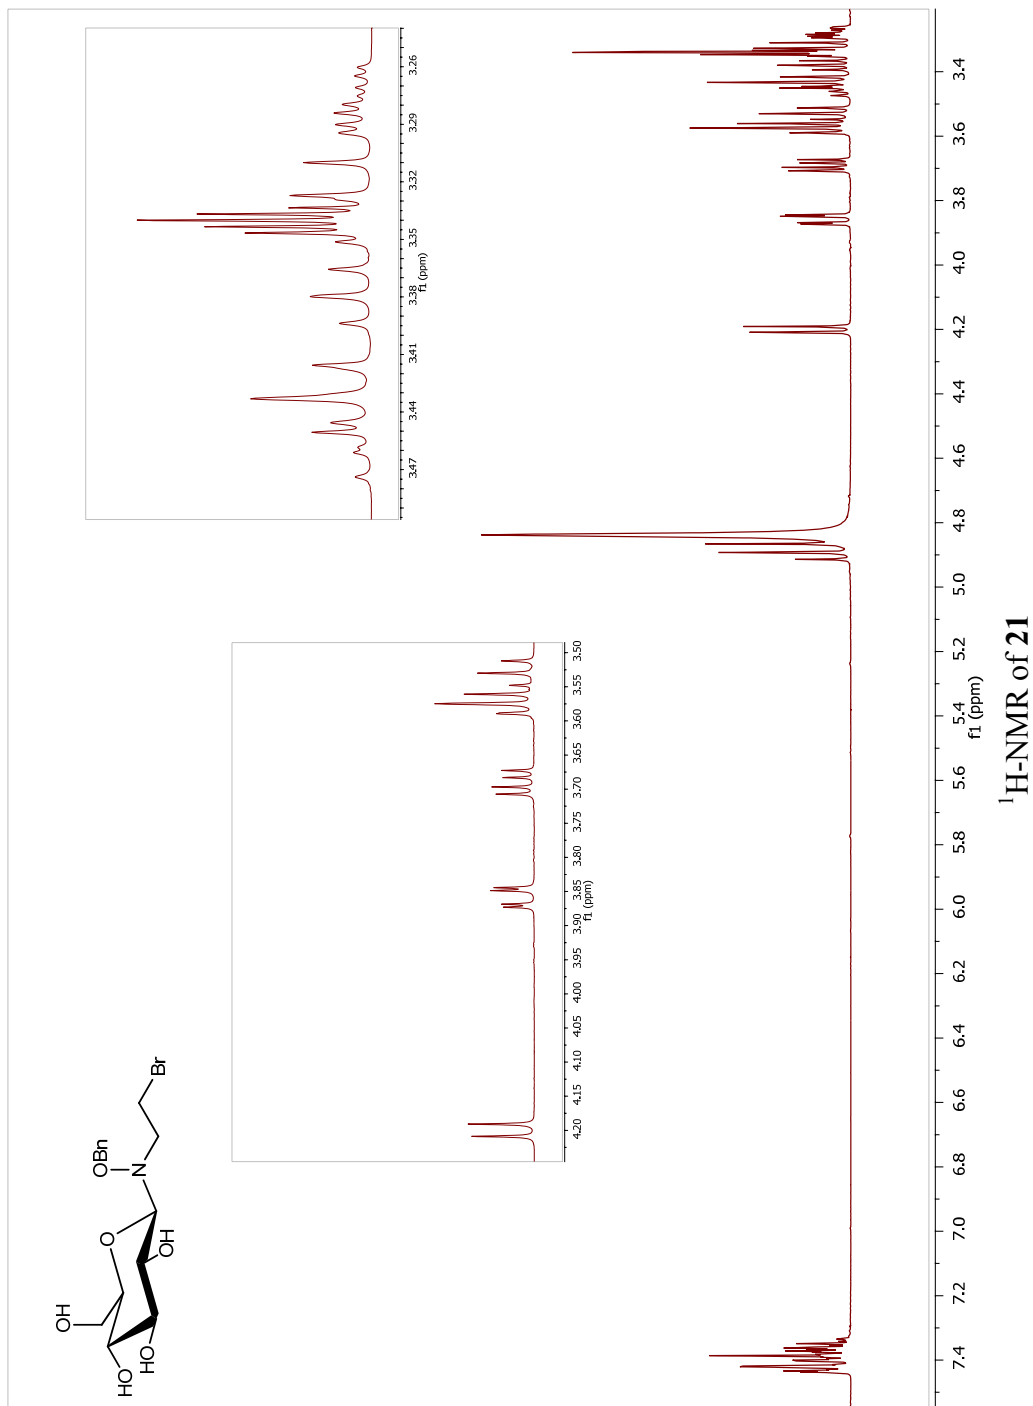

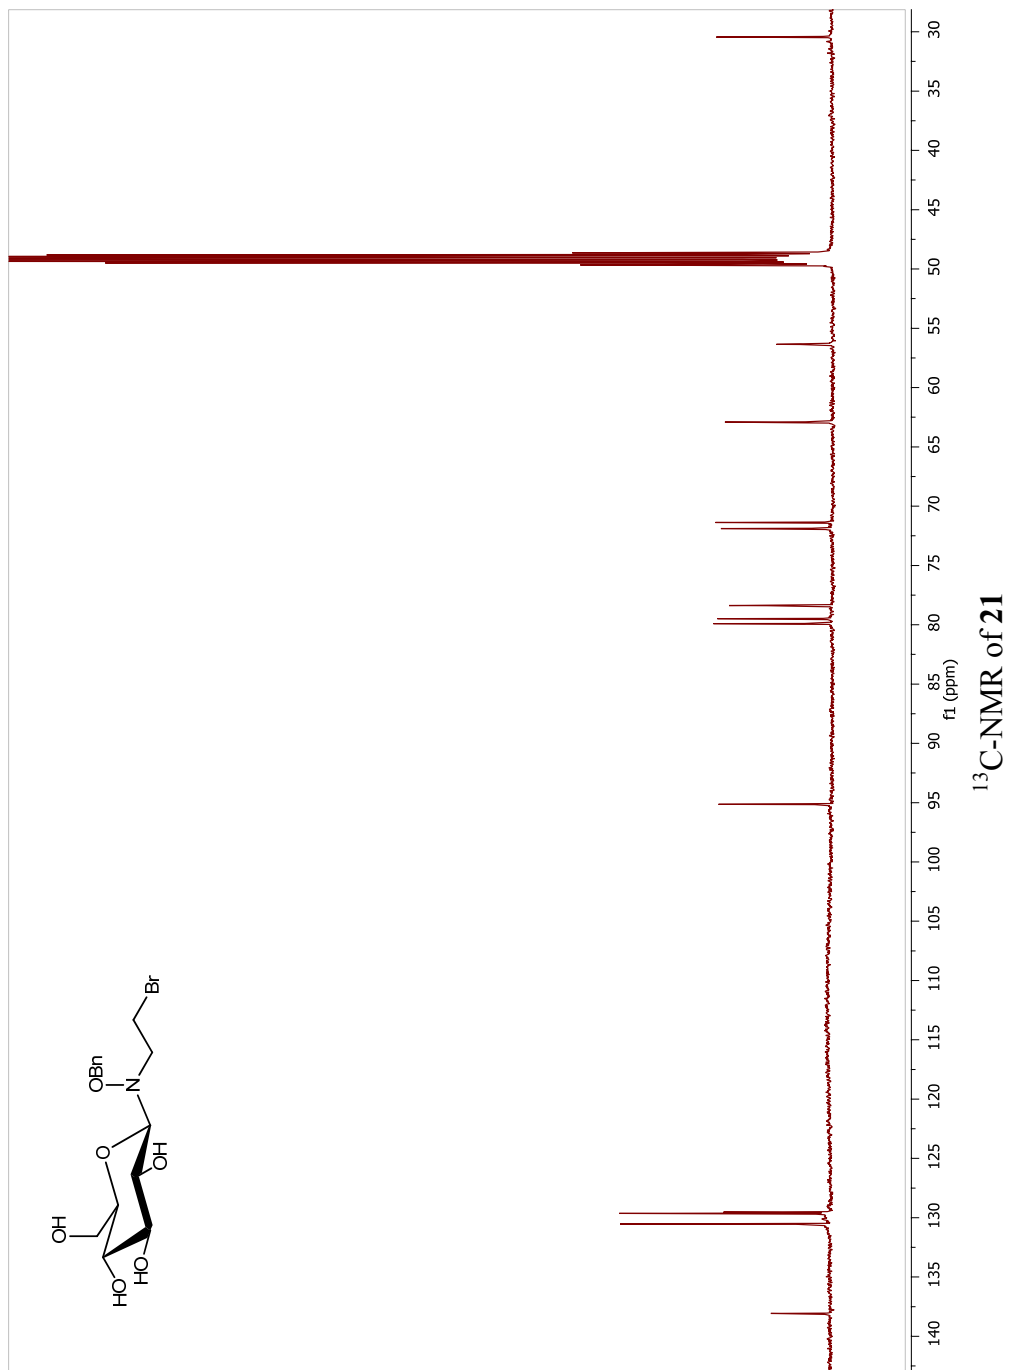

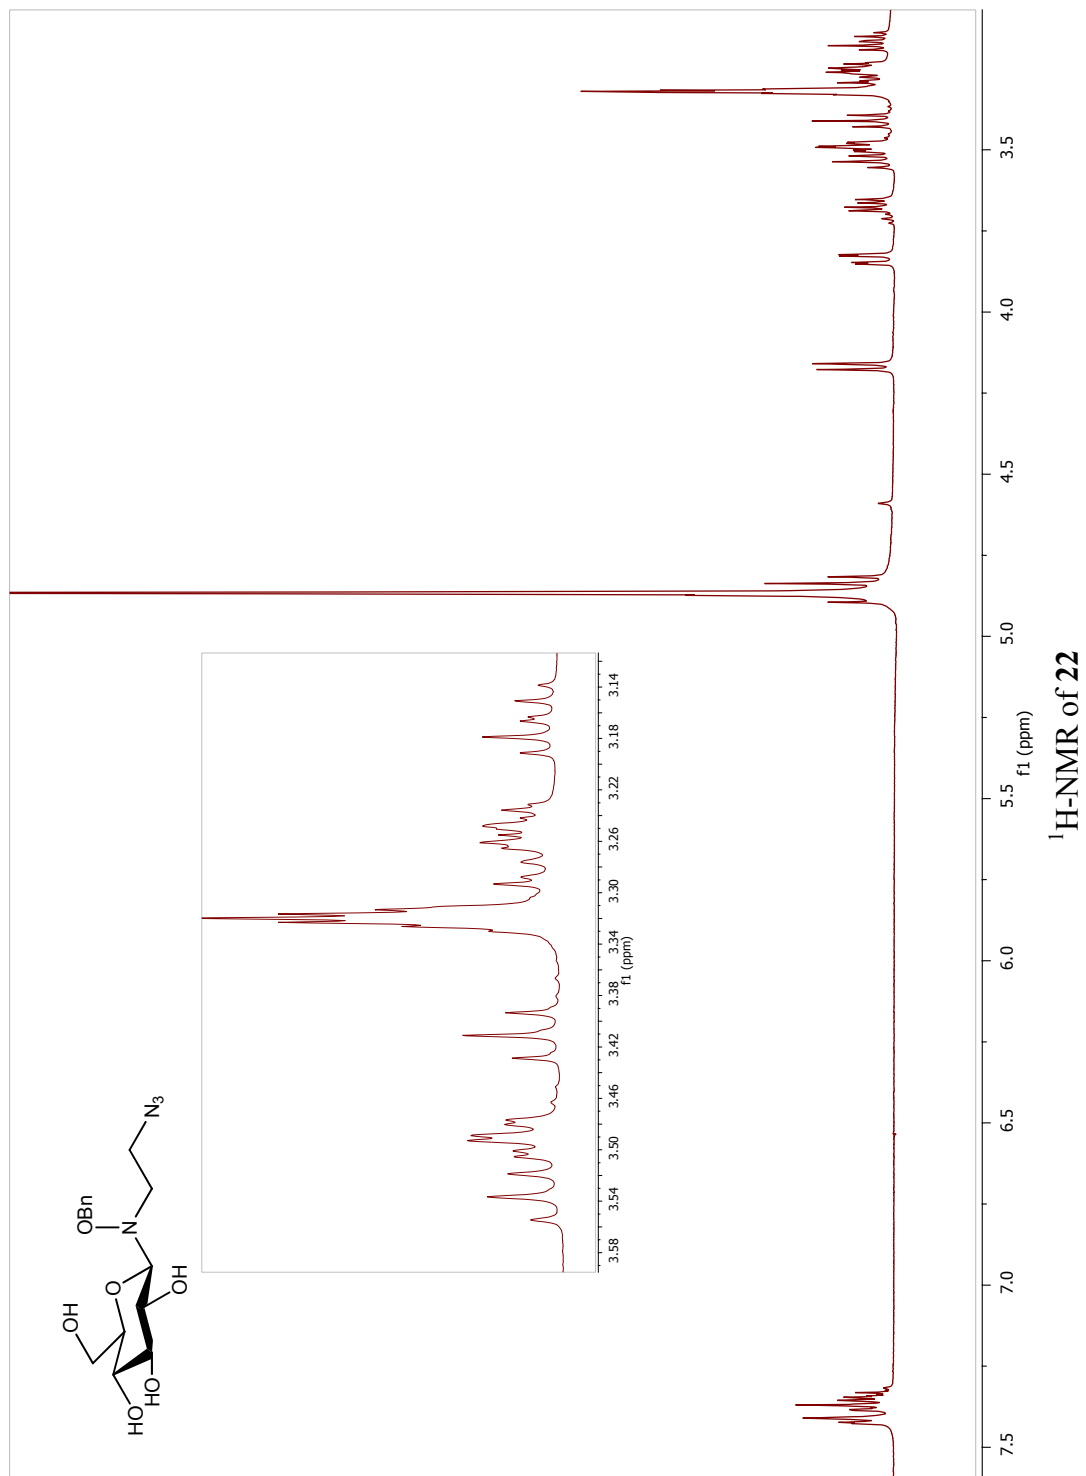

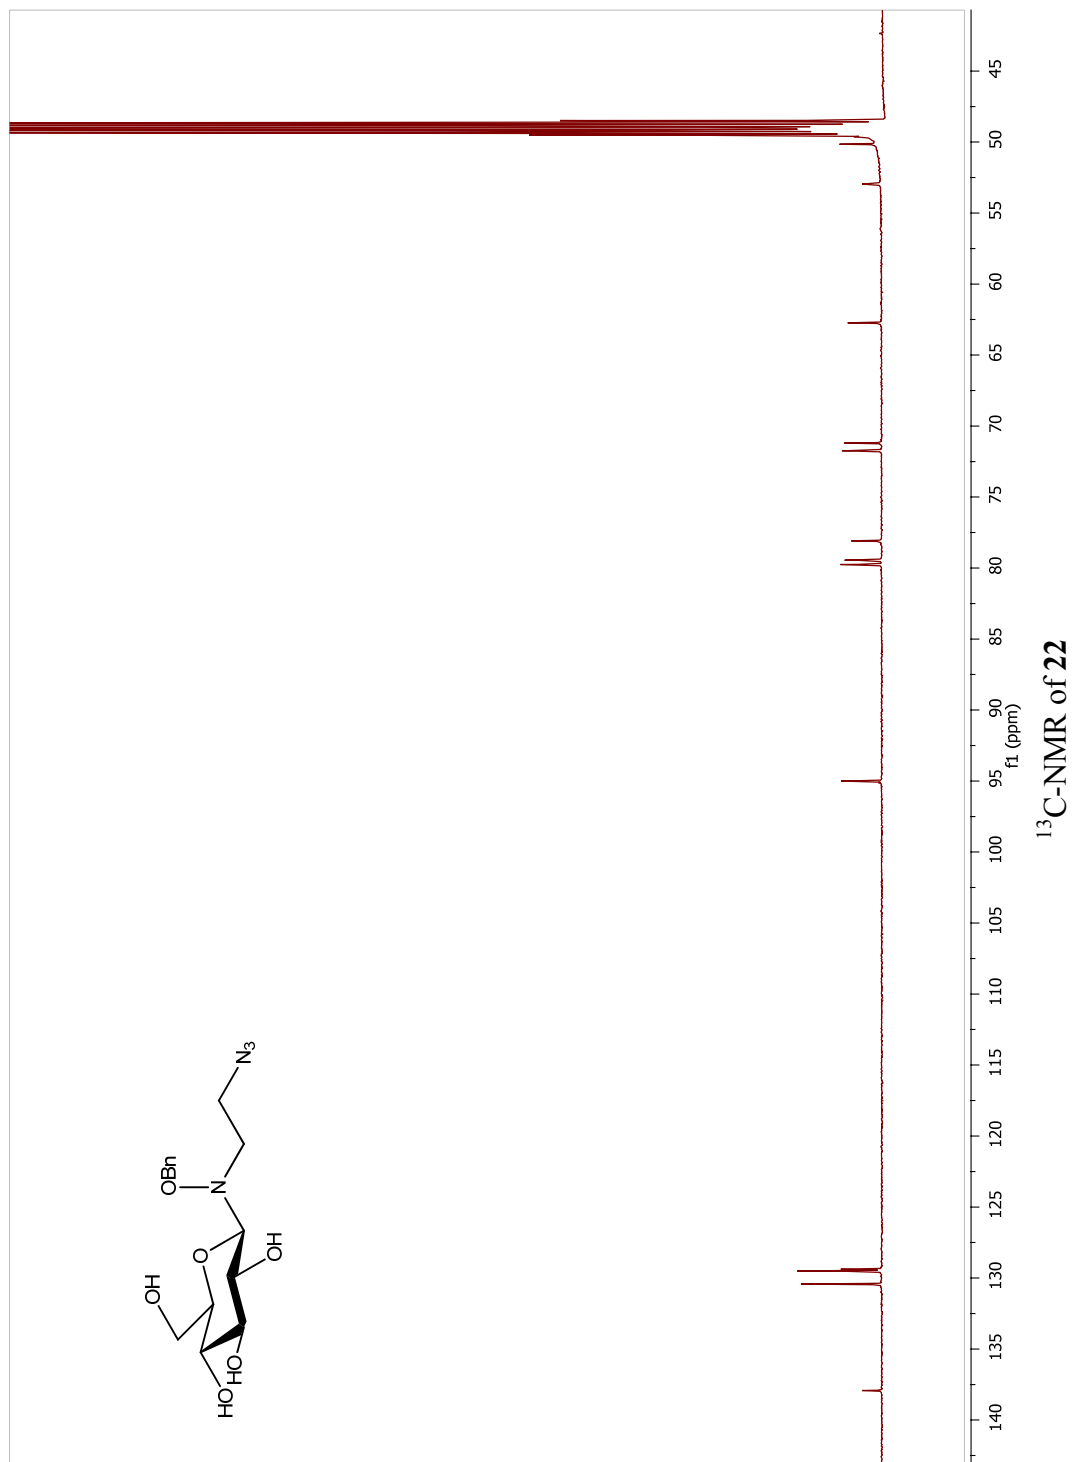

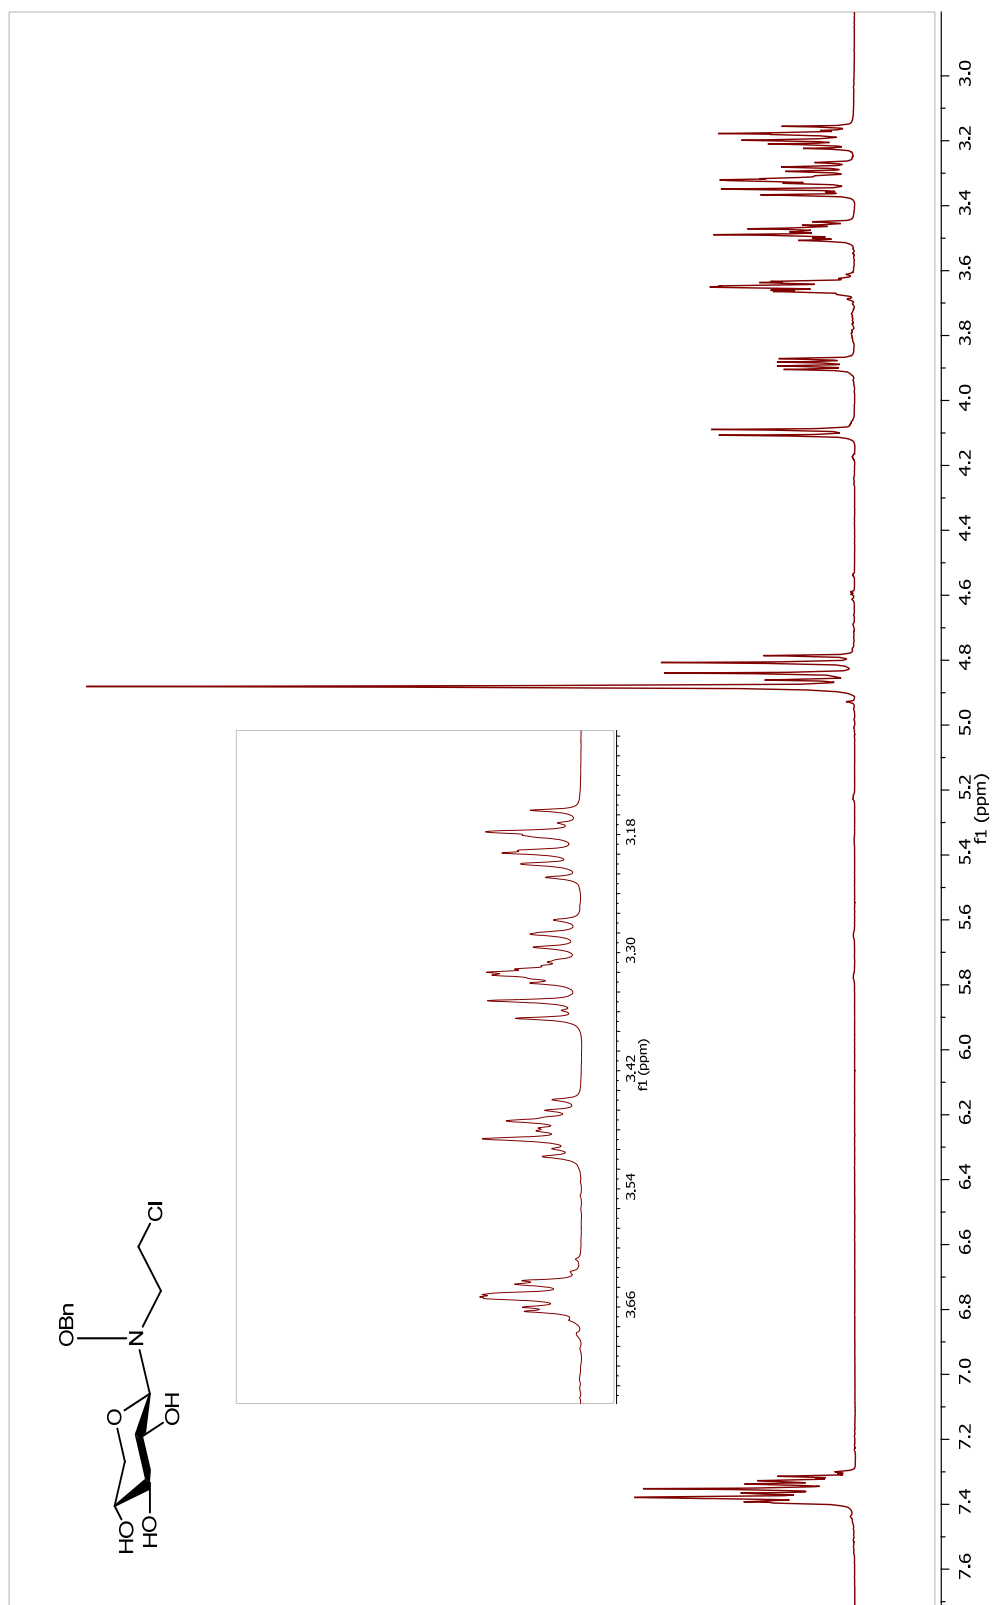

$^1\text{H-NMR}$  of **23**



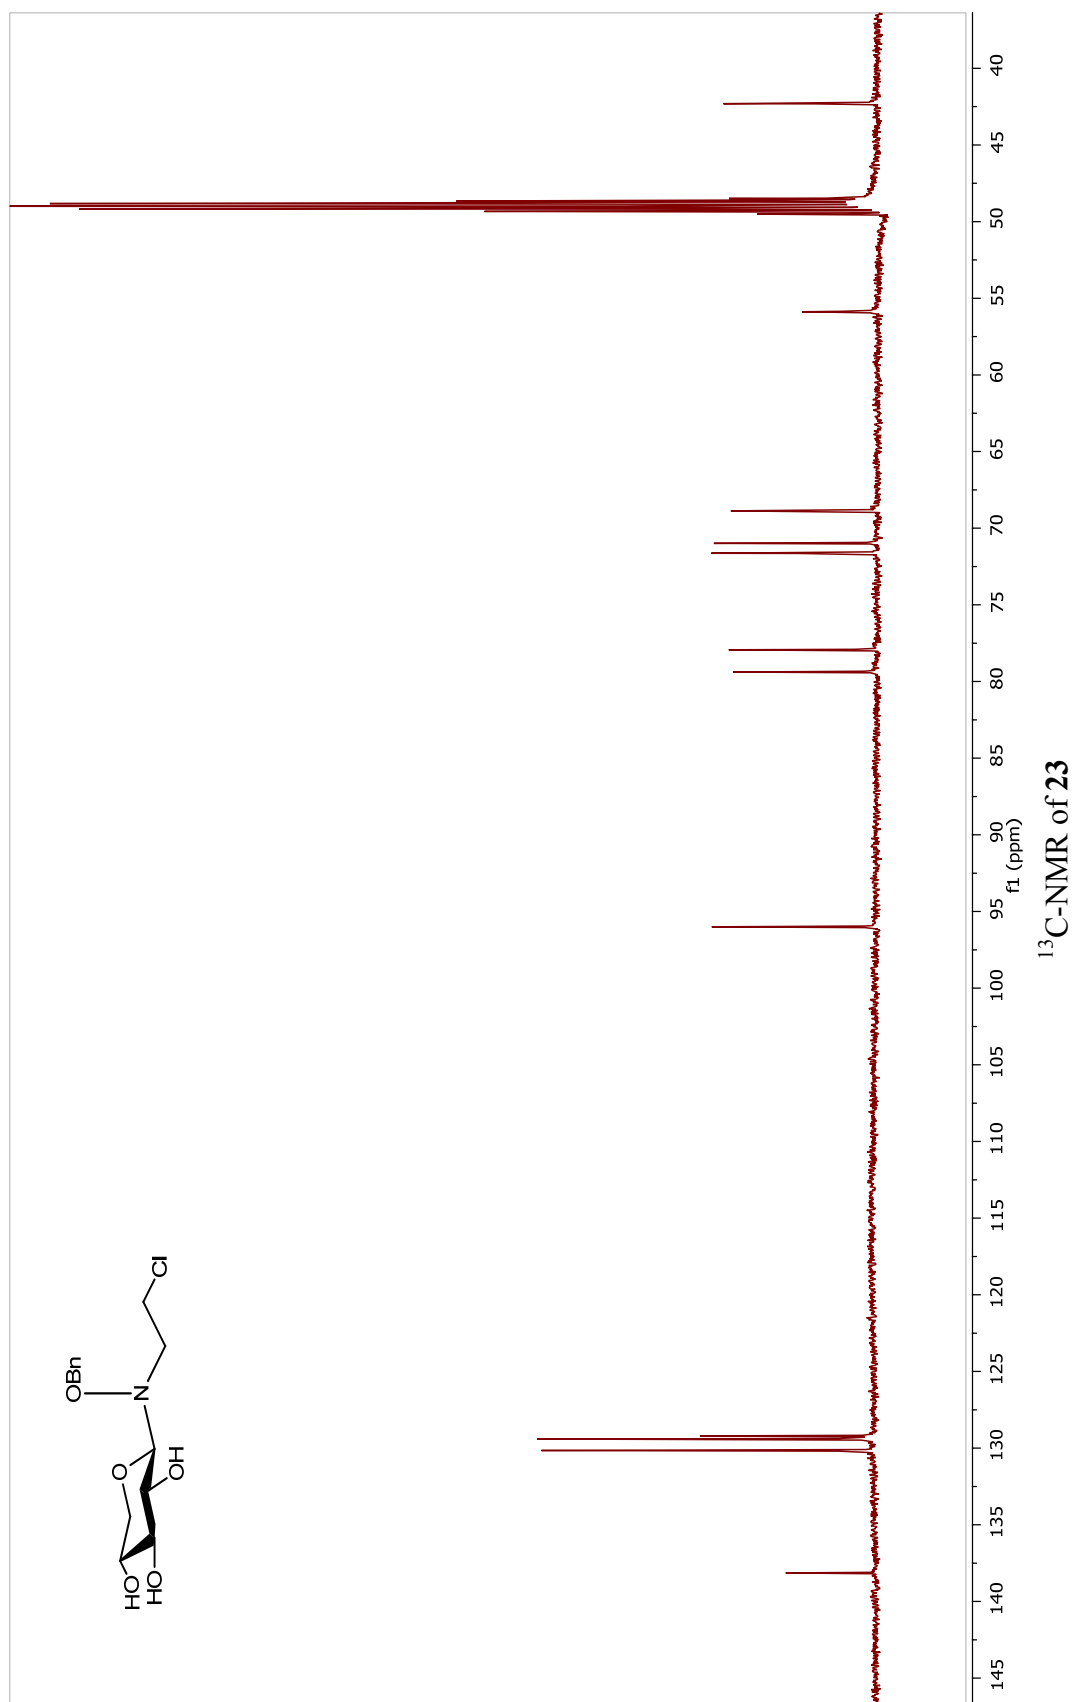

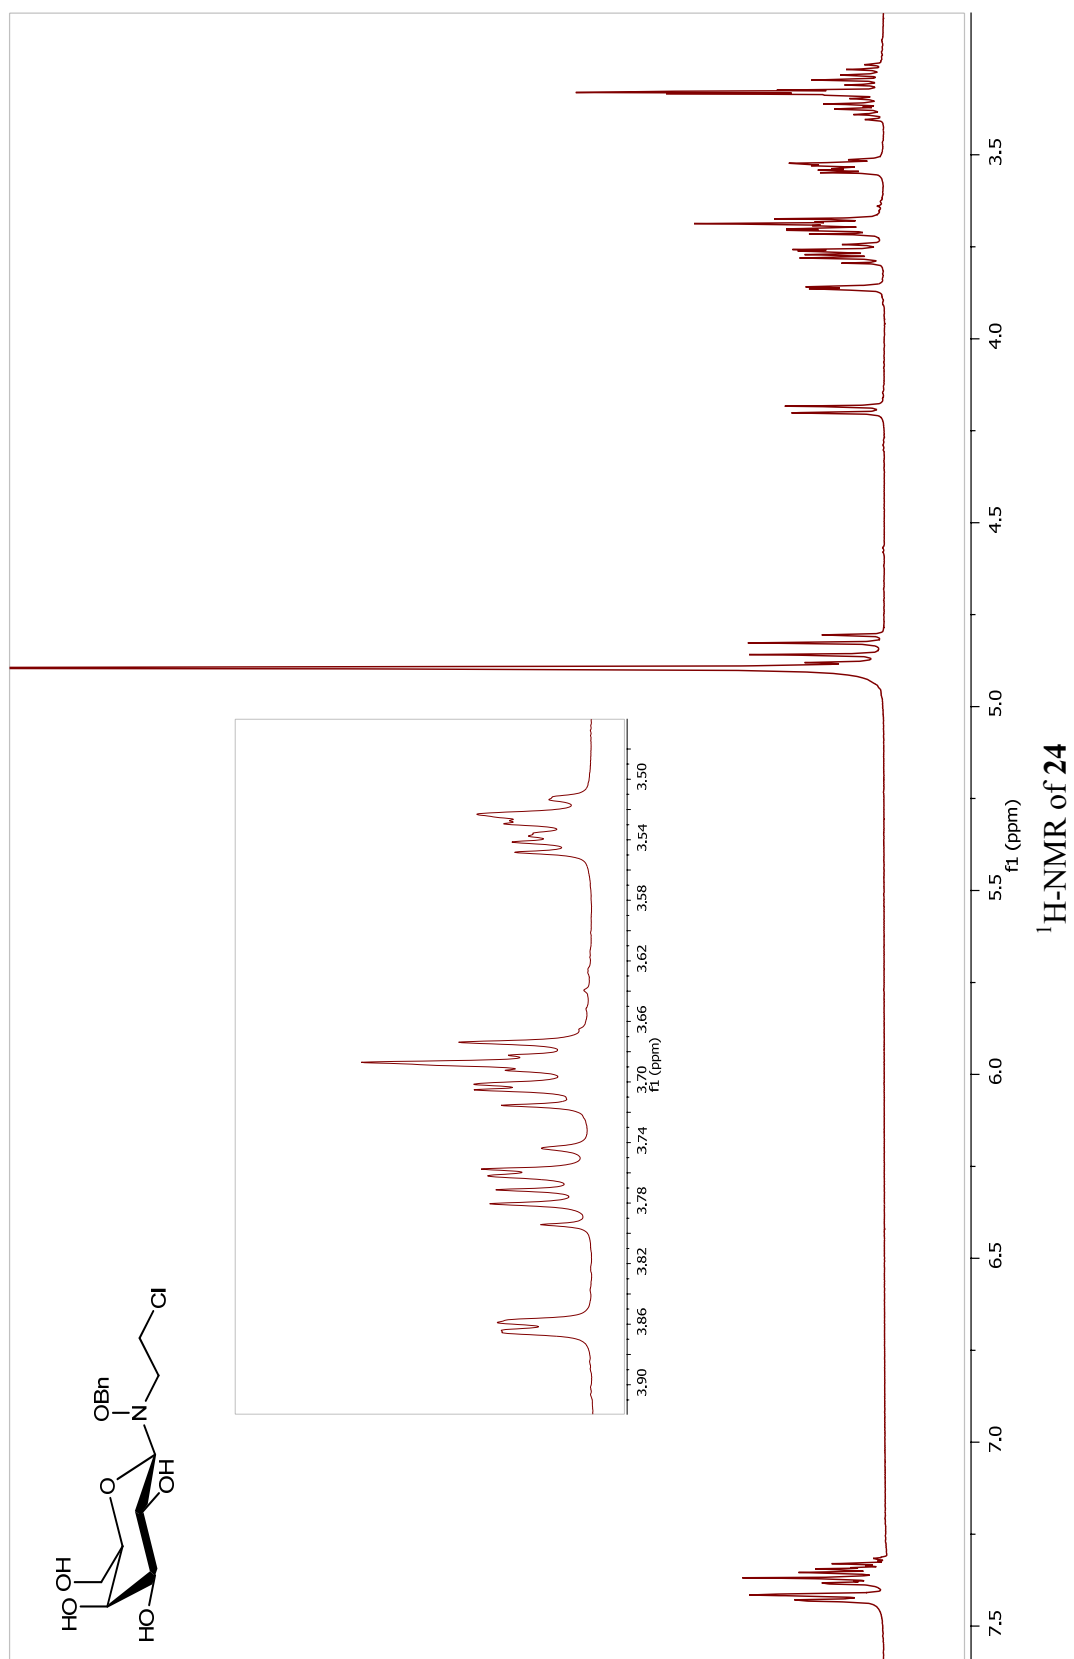

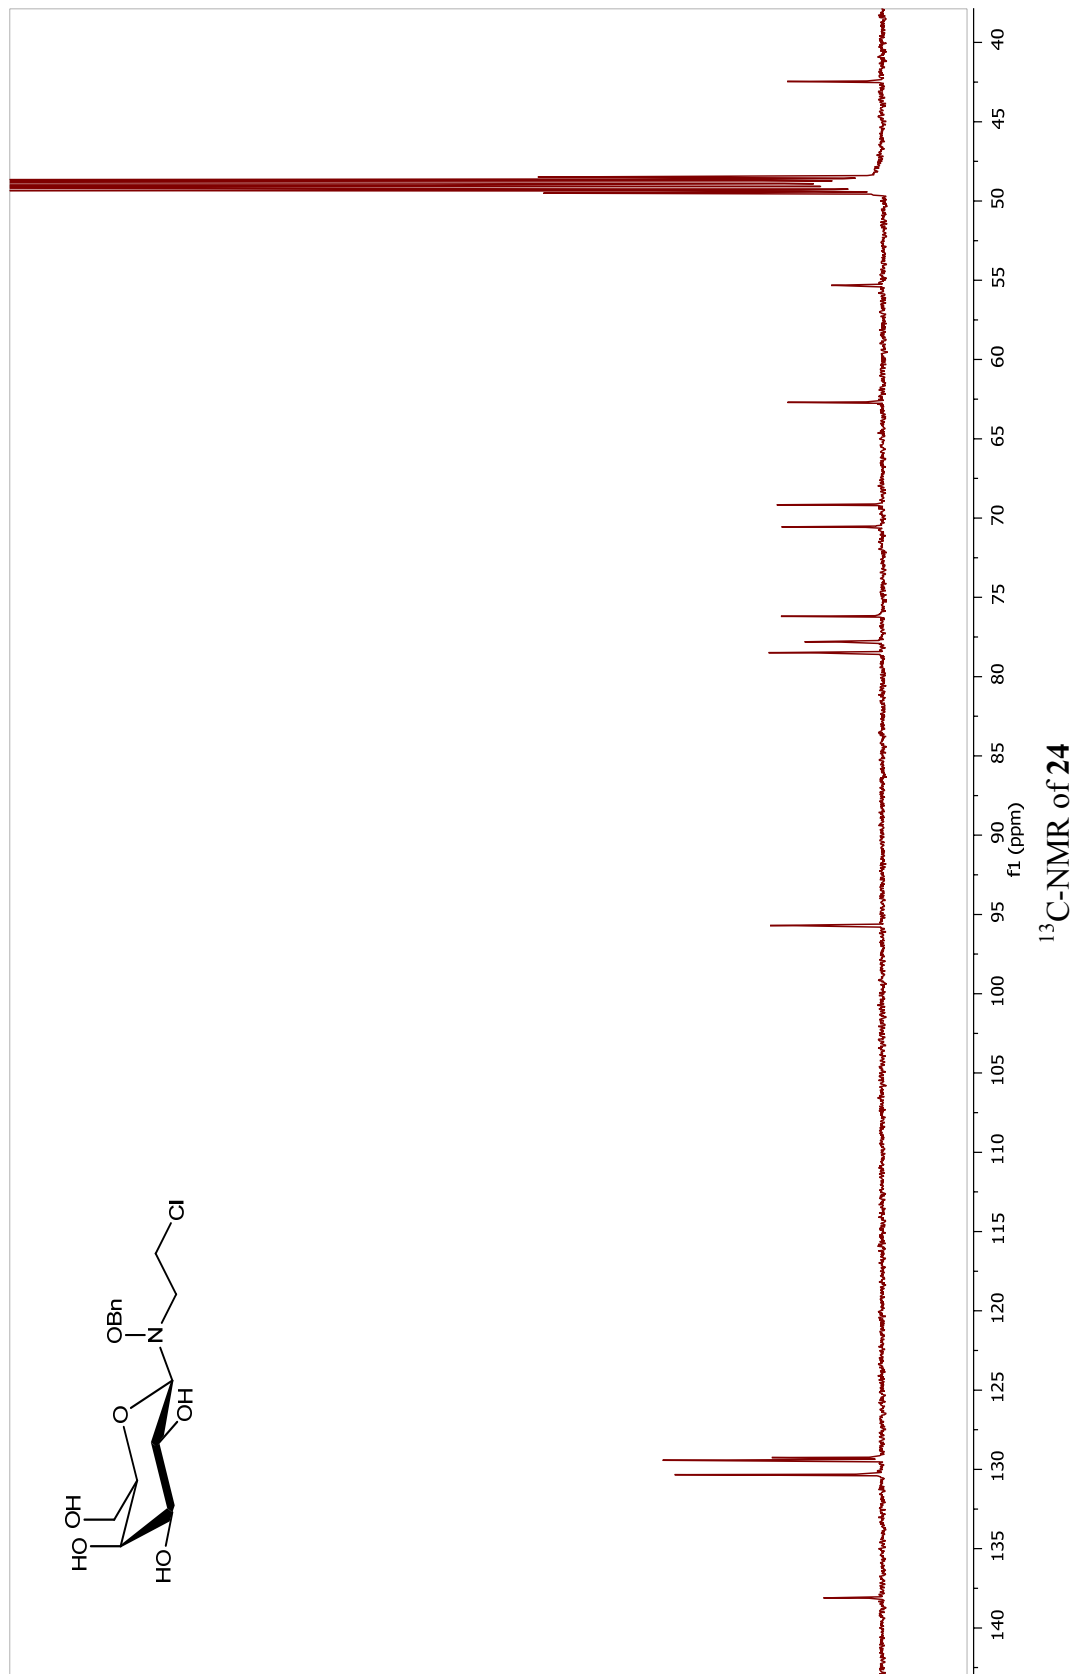

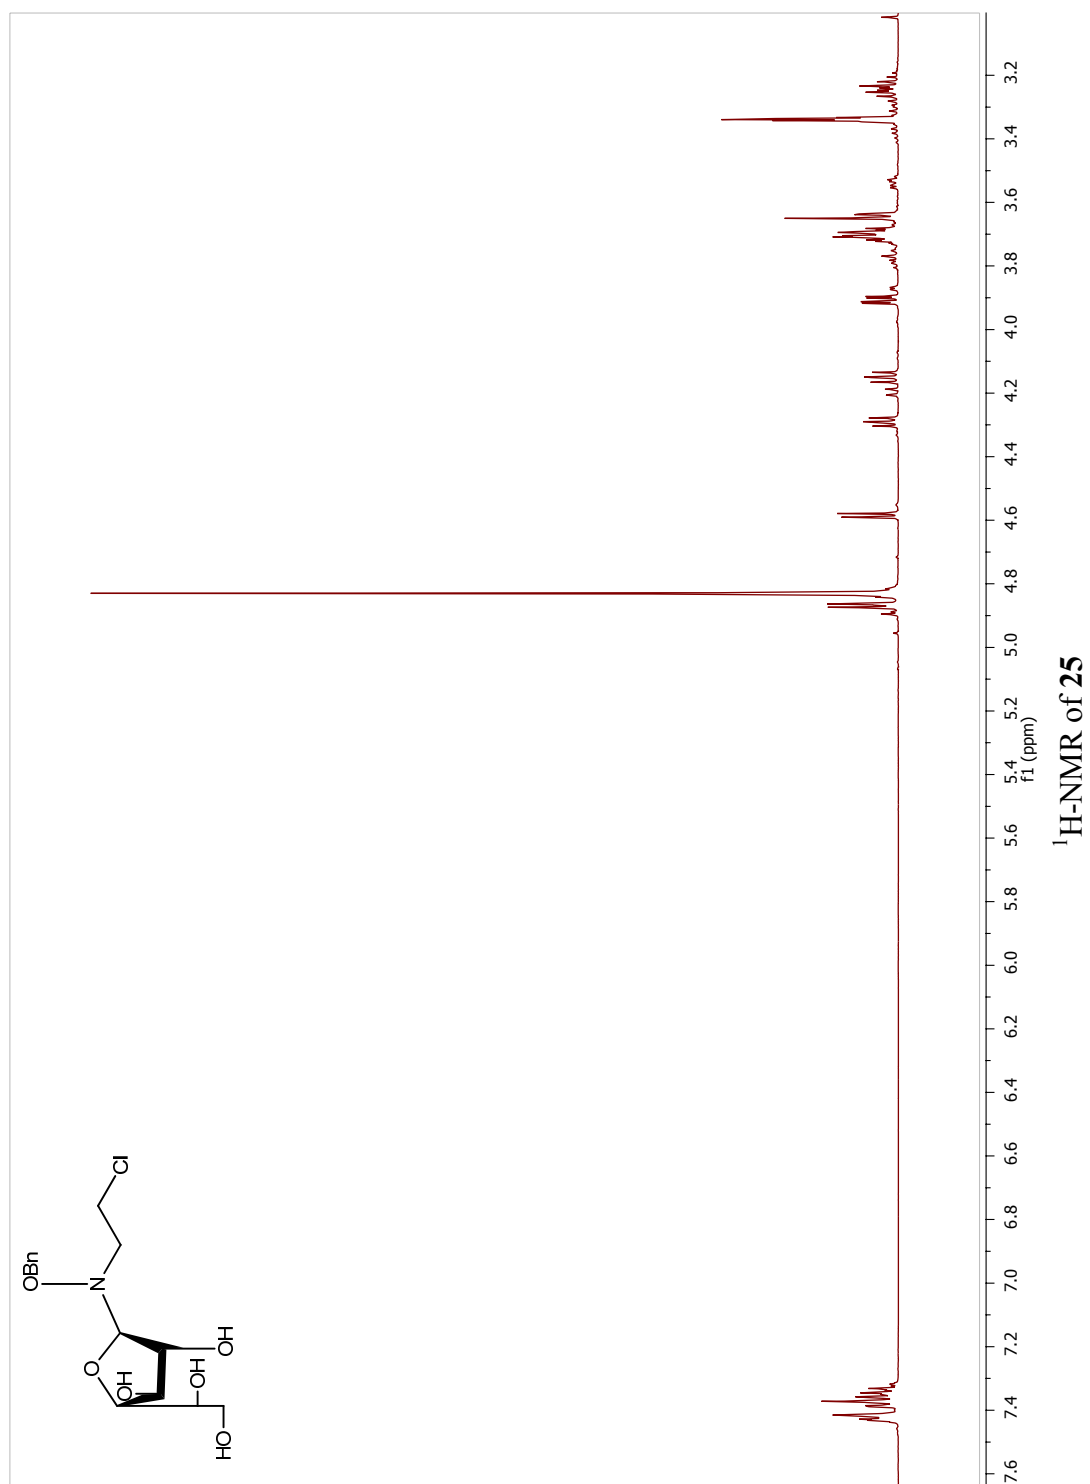

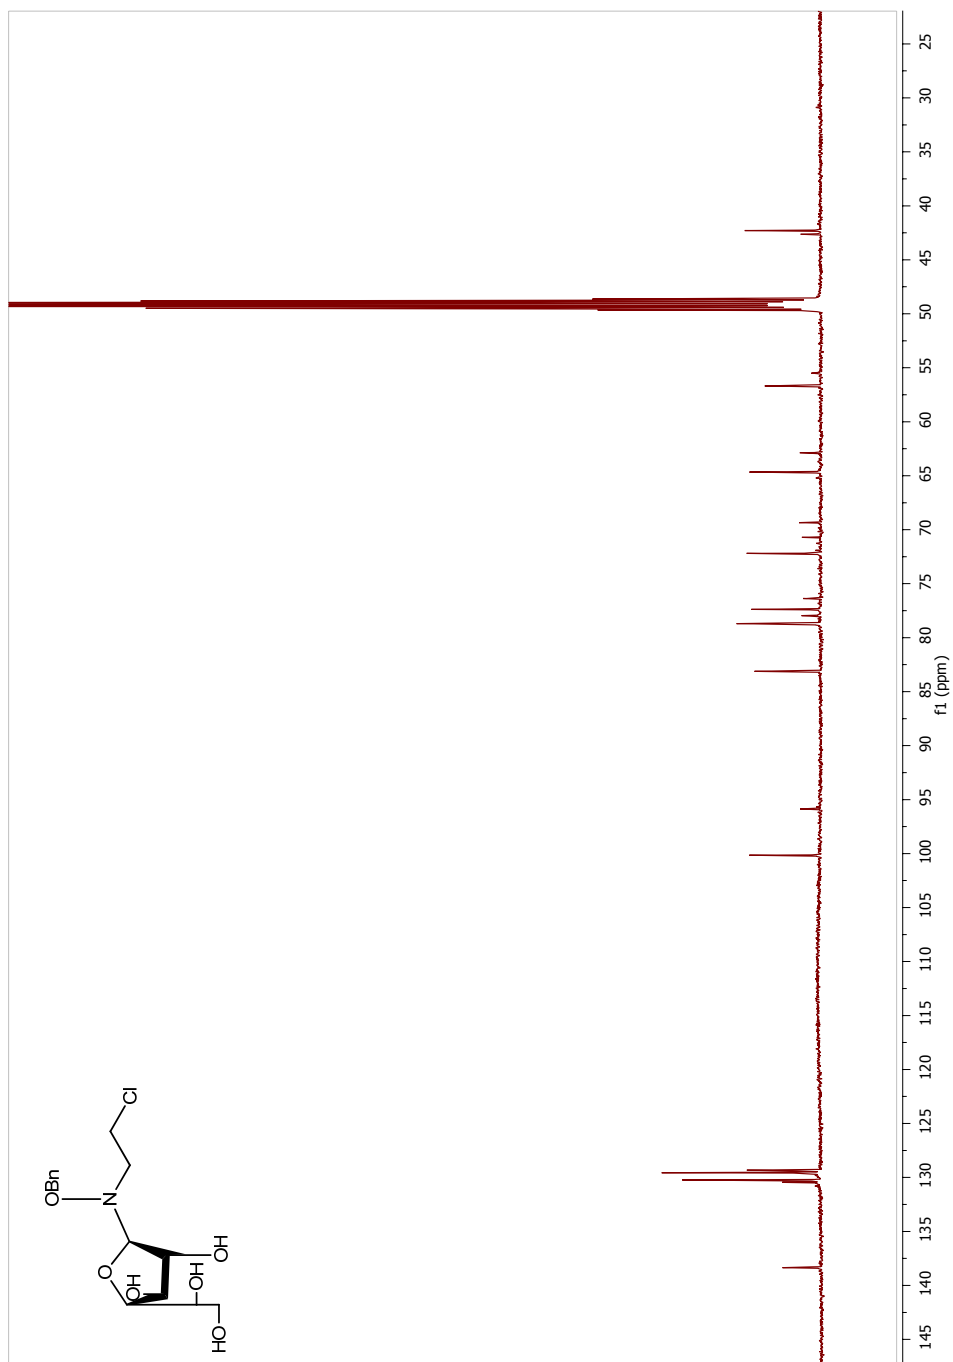

$^{13}\text{C}$ -NMR of **25**

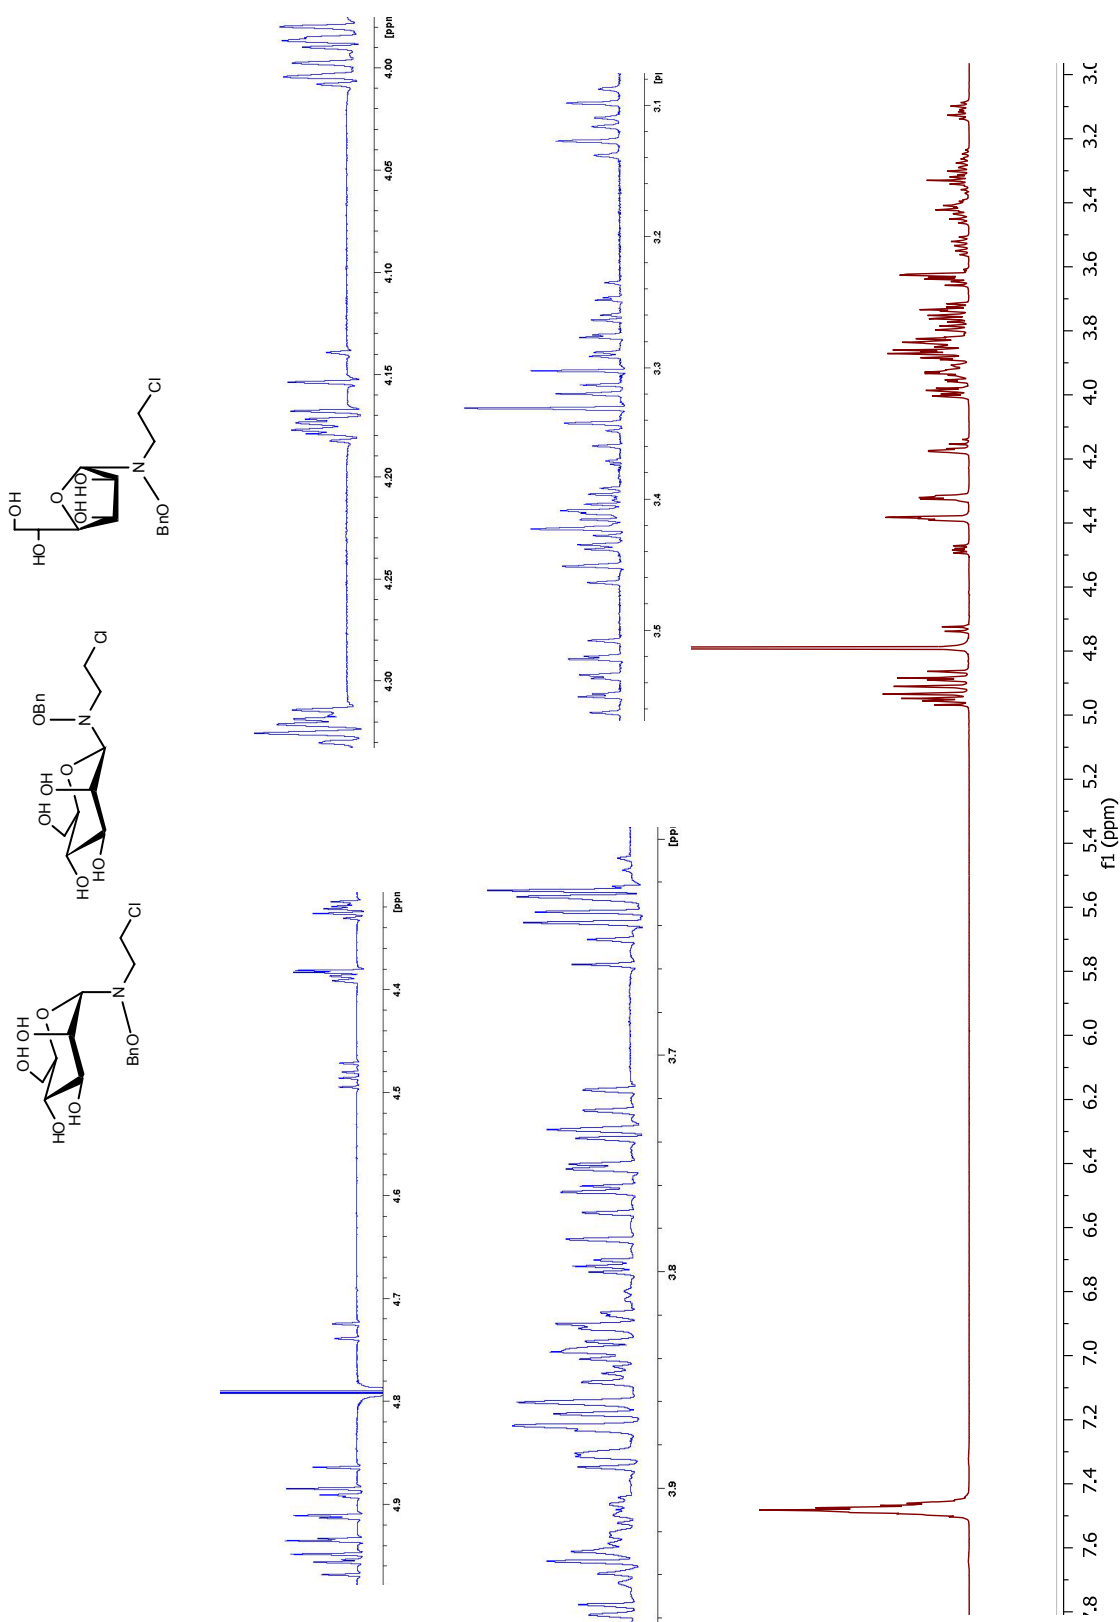

<sup>1</sup>H-NMR of 26-28

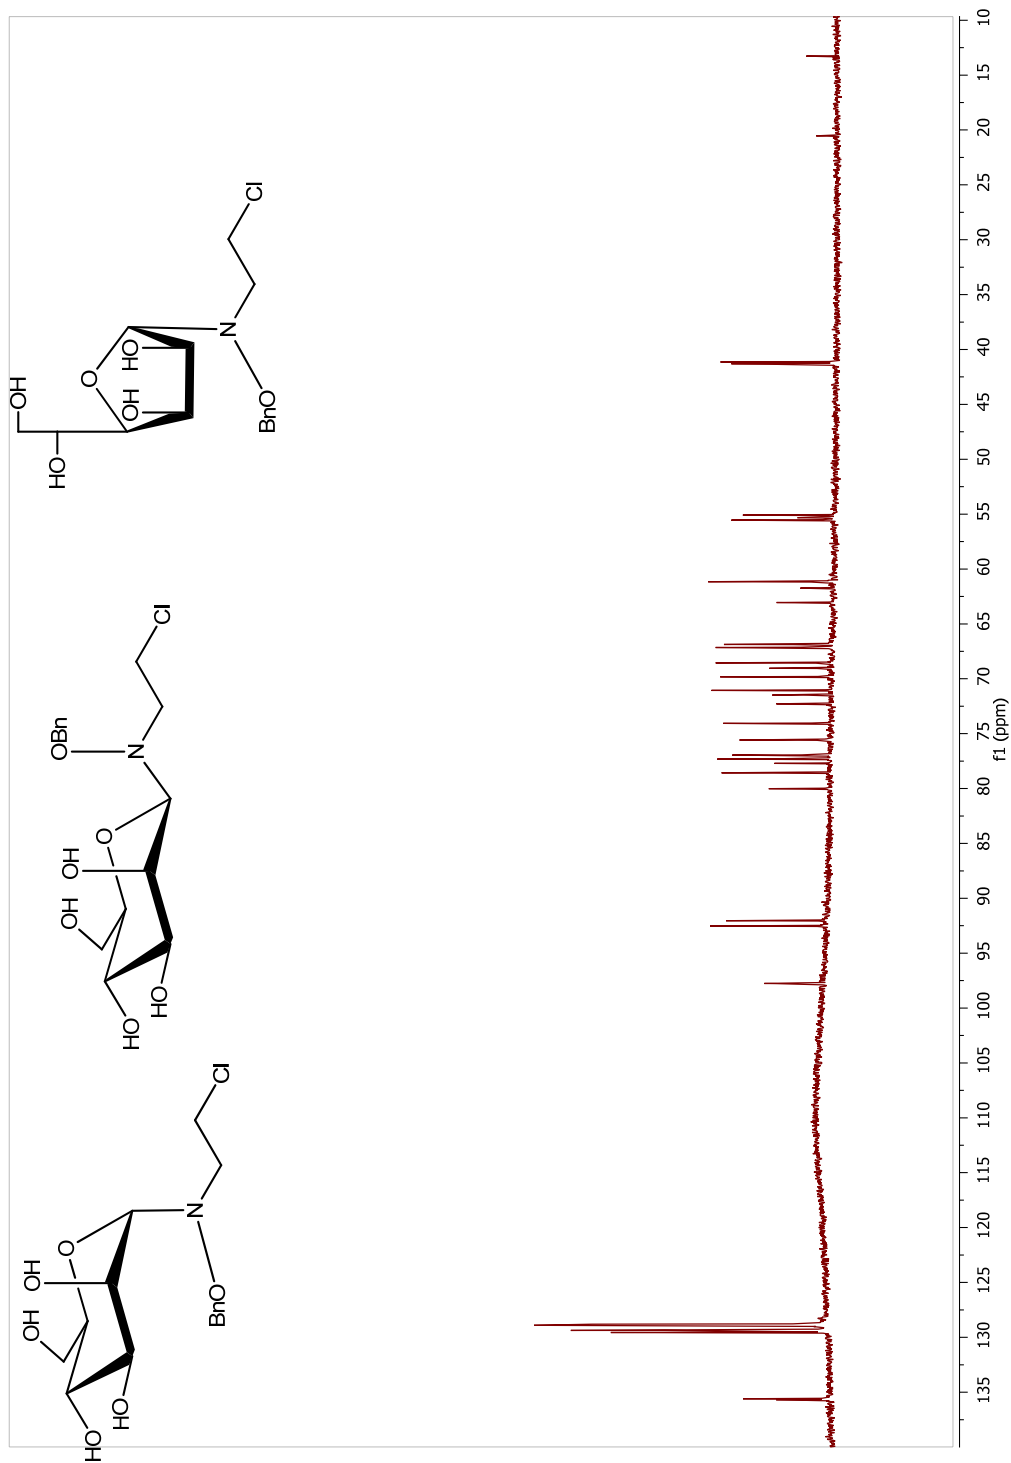

$^{13}\text{C-NMR}$  of 26-28

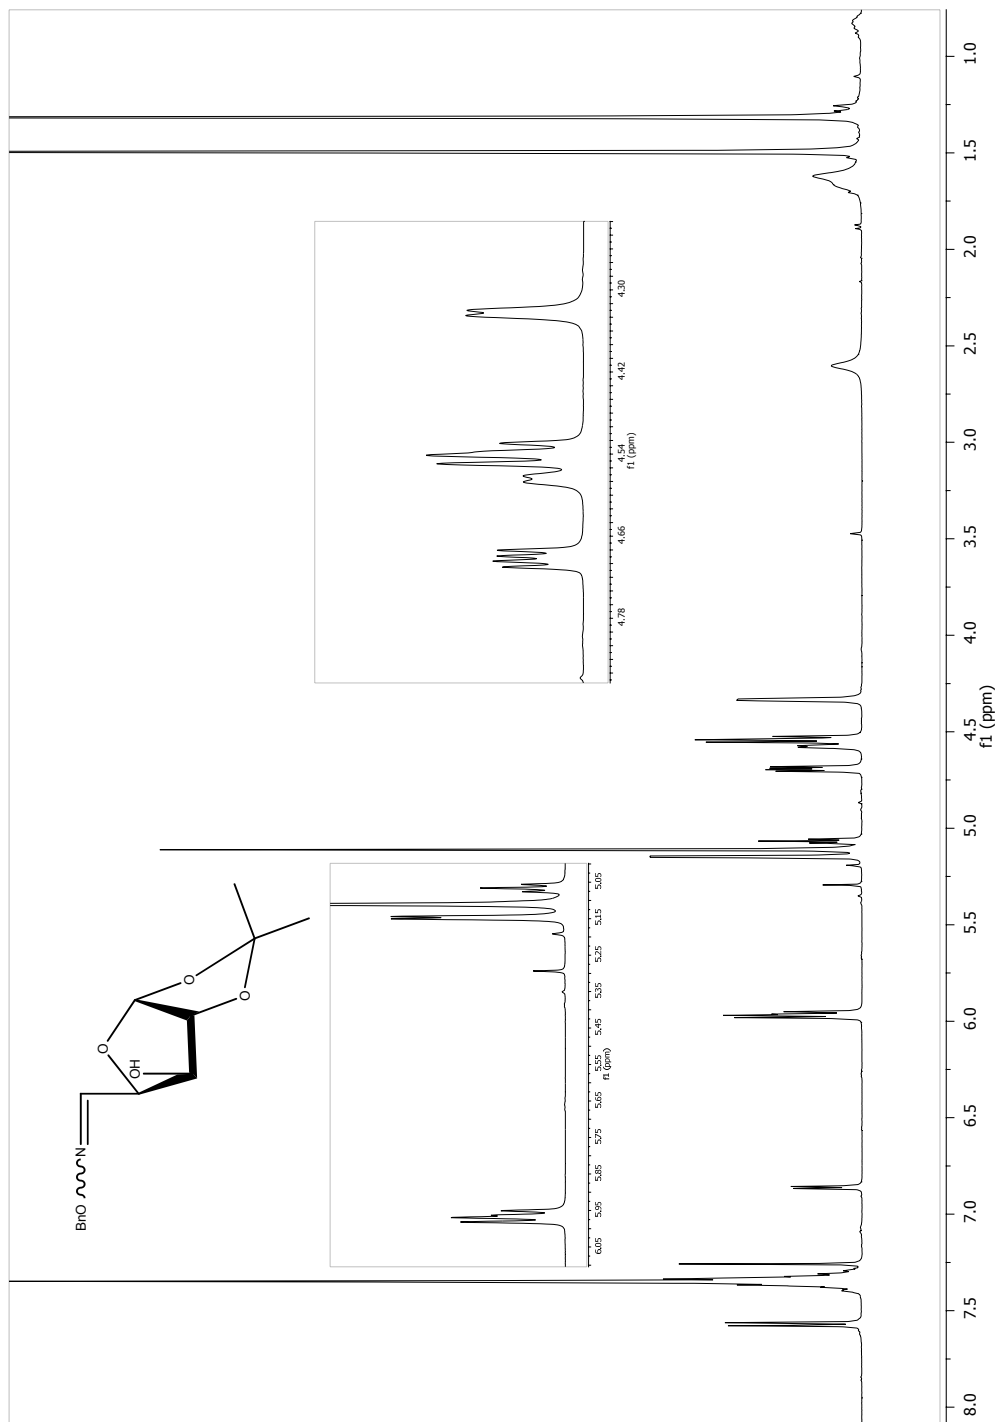

<sup>1</sup>H-NMR of 30



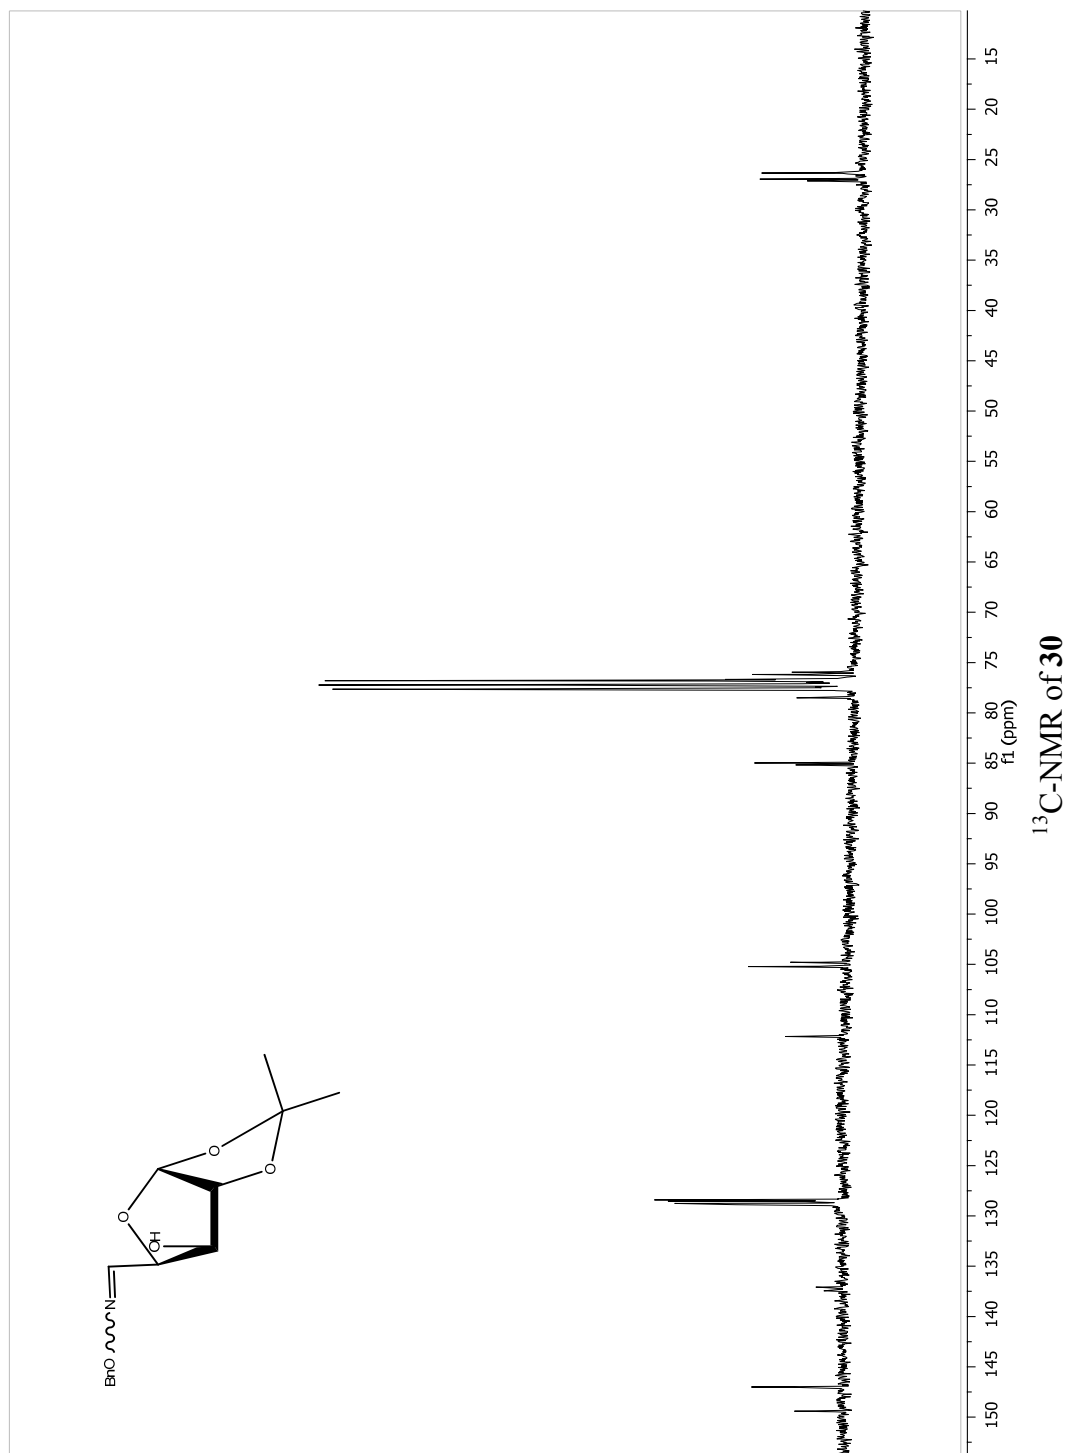

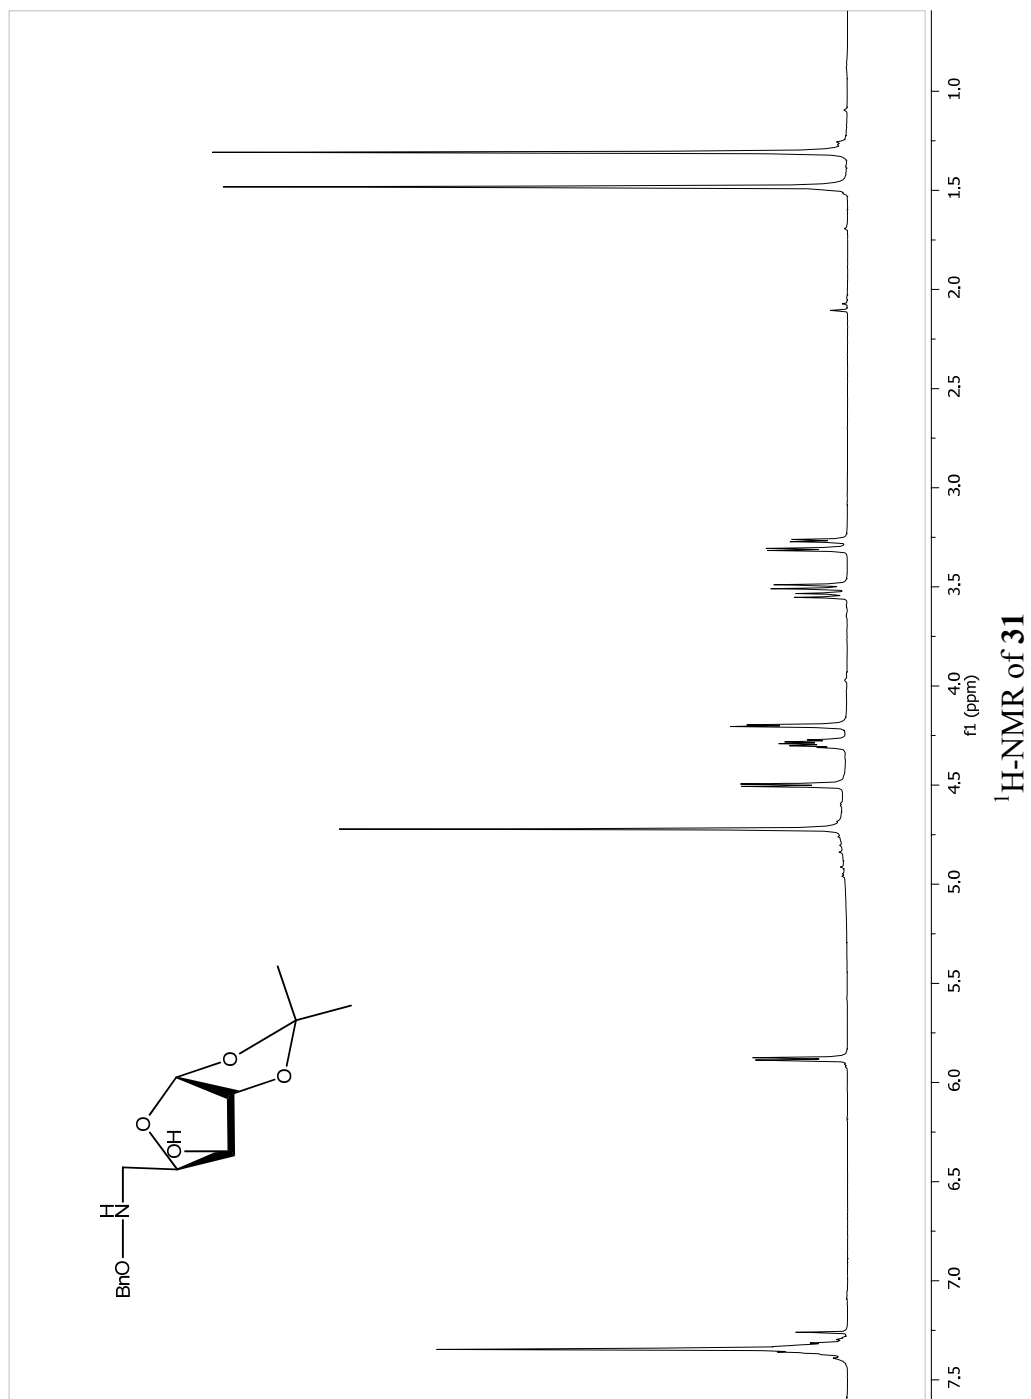

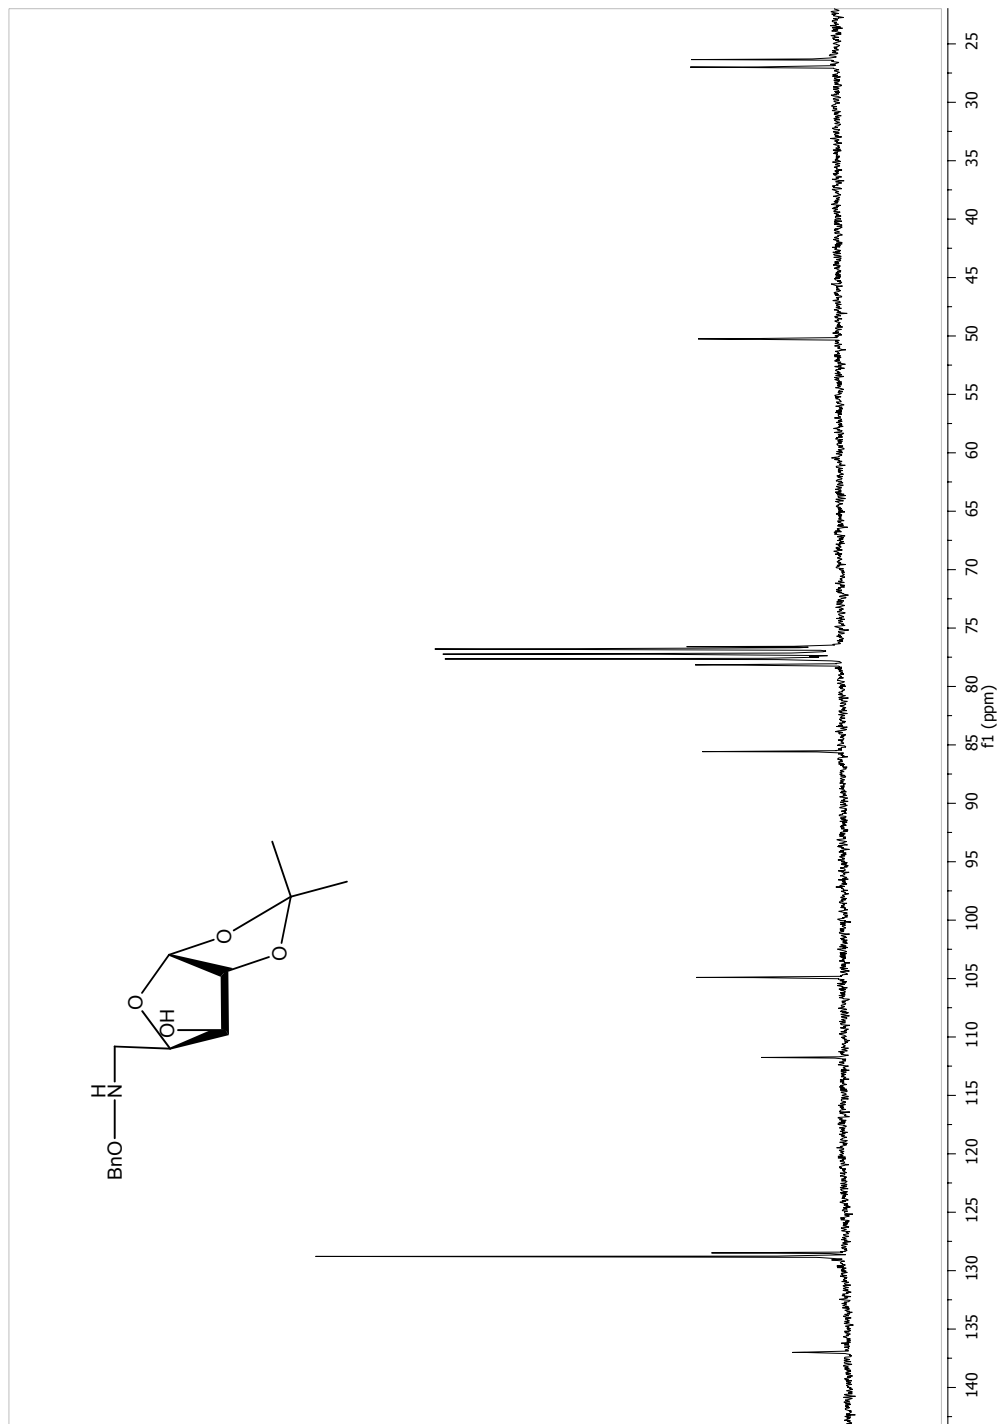

$^{13}\text{C}$ -NMR of **31**

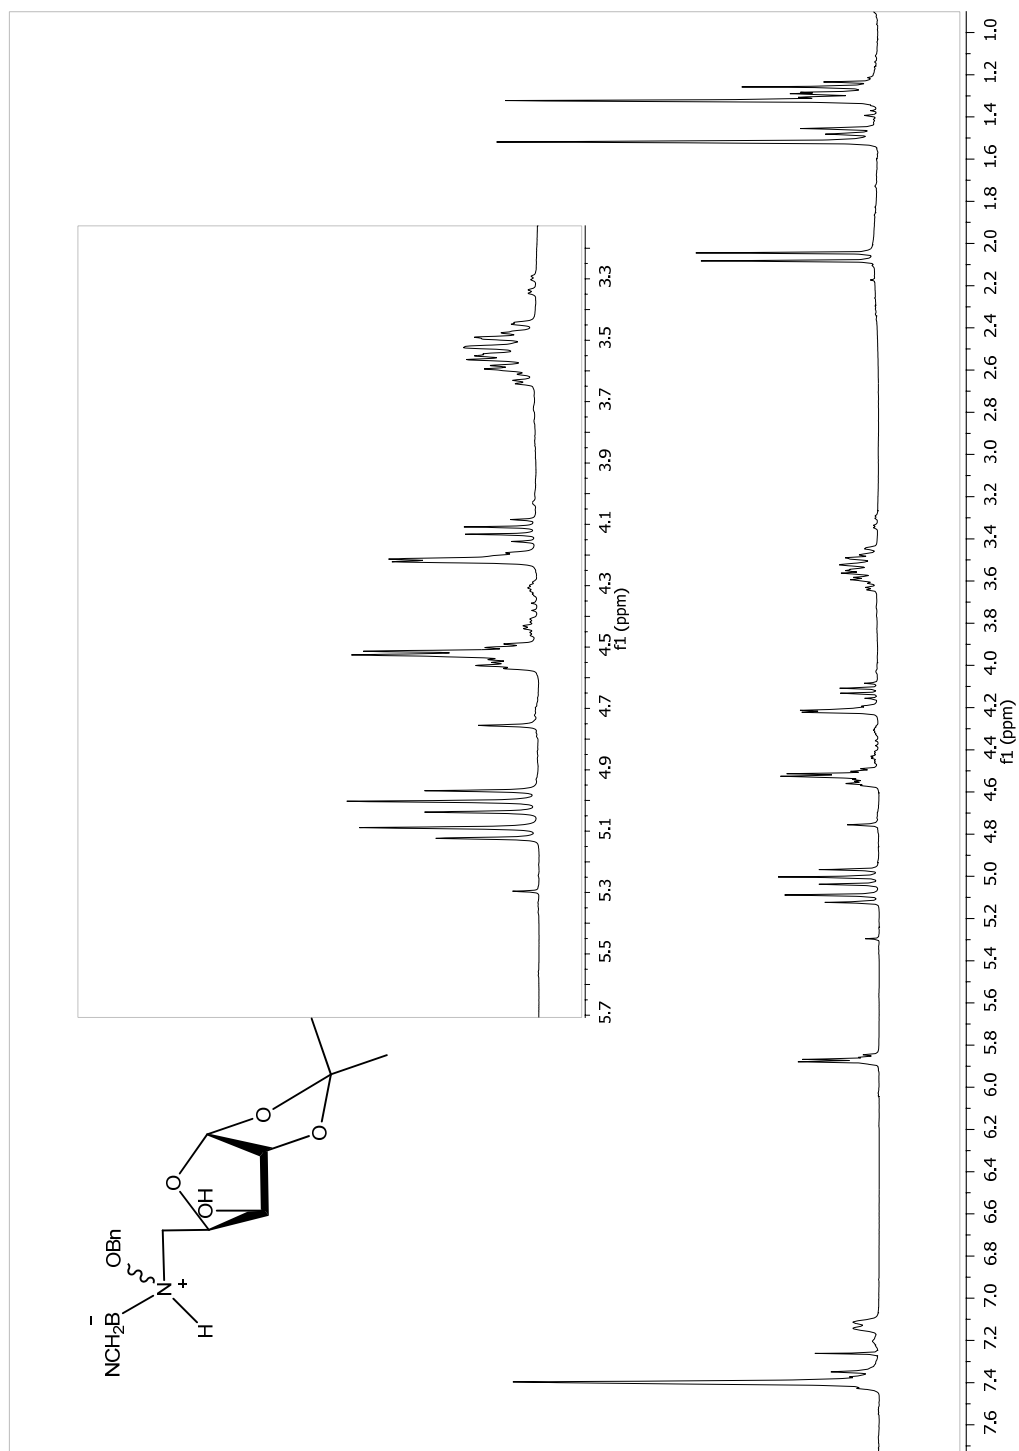

$^1\text{H-NMR}$  of **32**

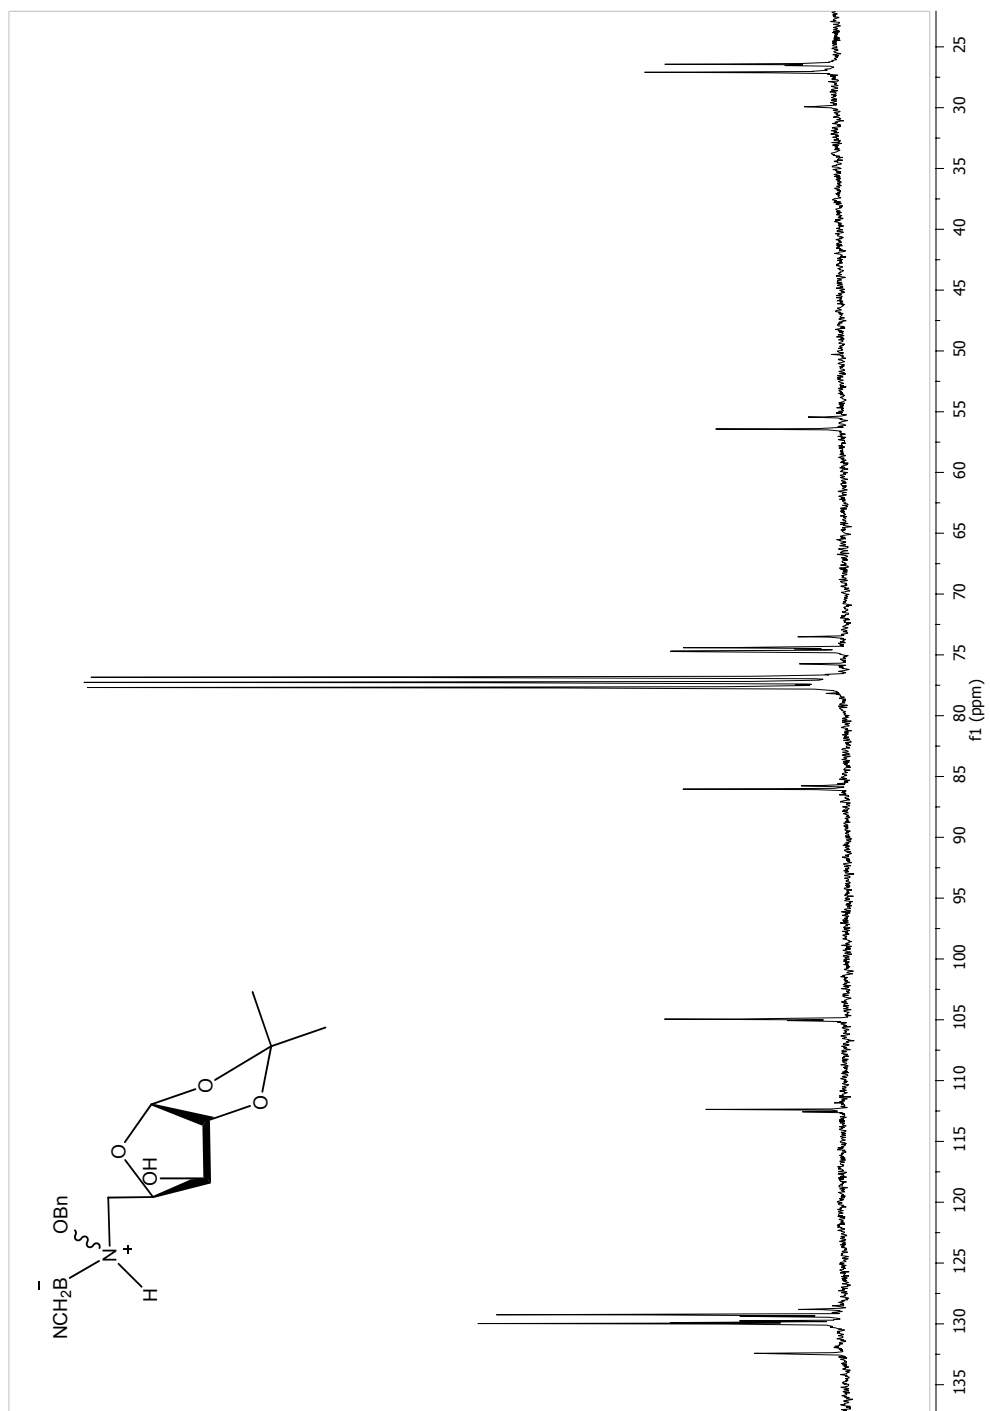

$^{13}\text{C}$ -NMR of 32

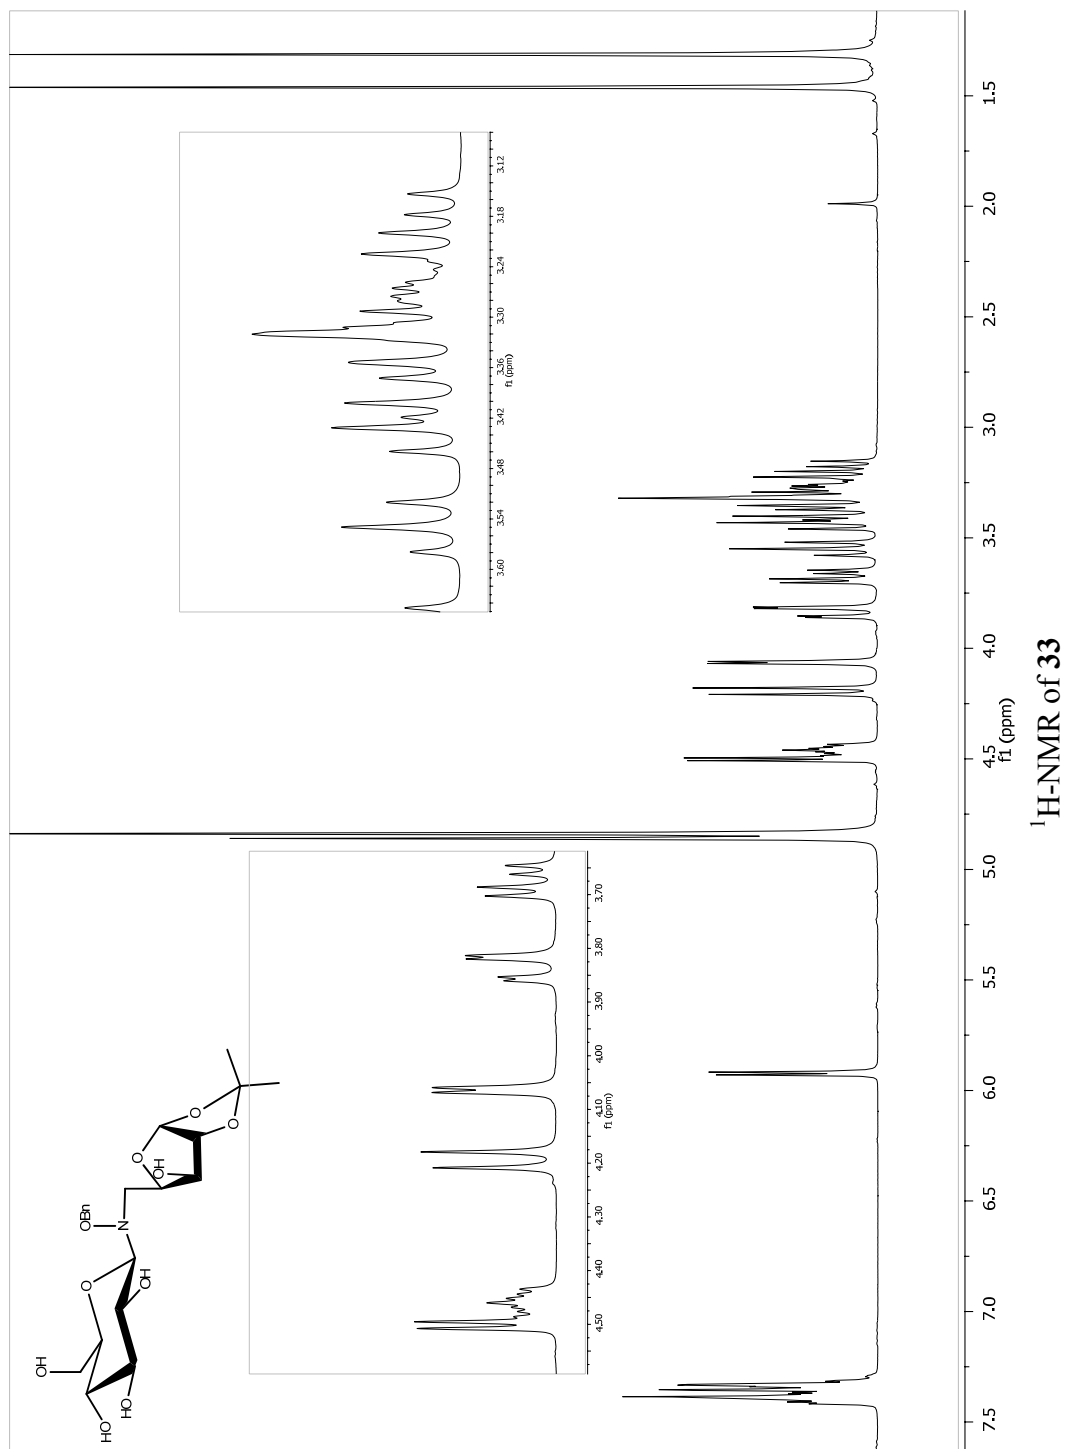

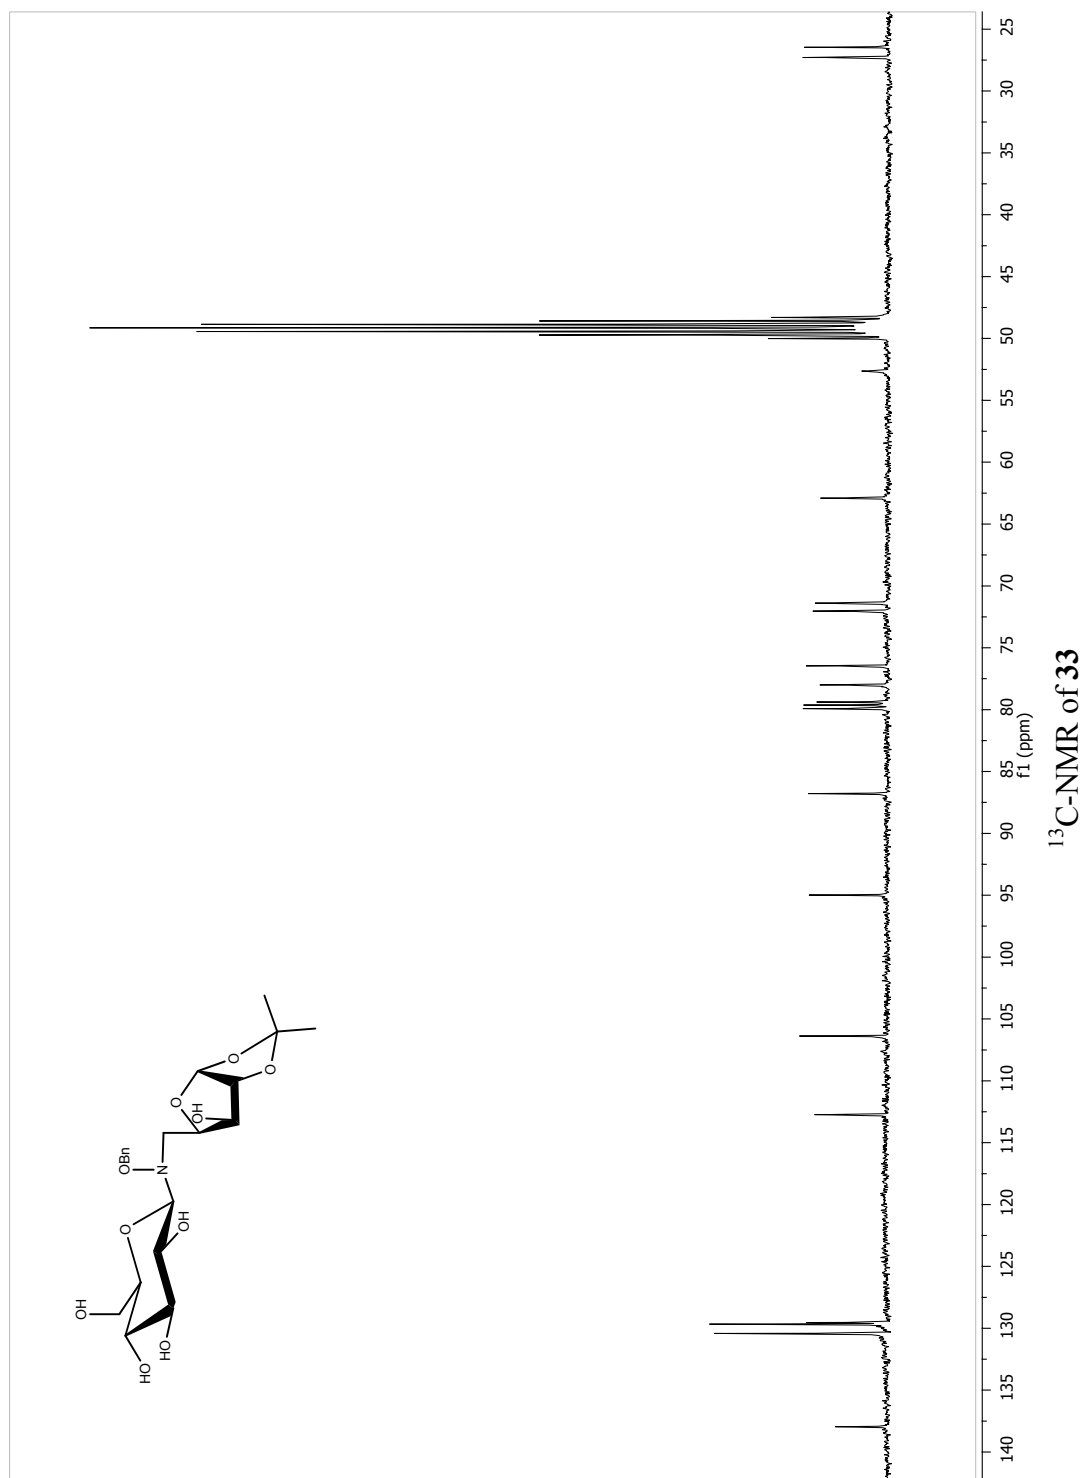

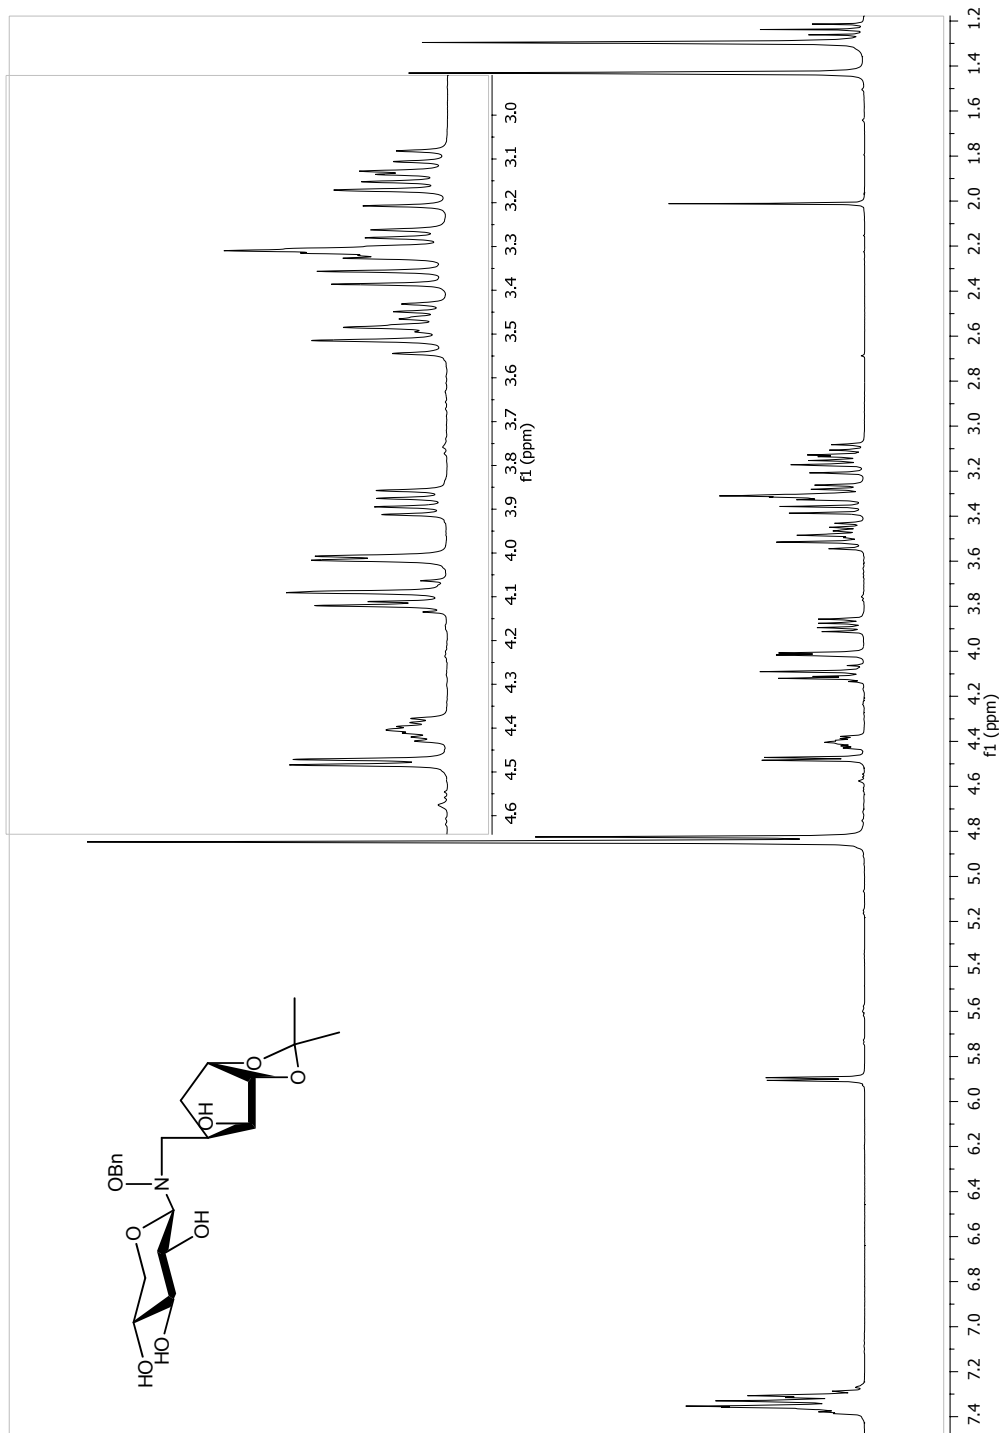

<sup>1</sup>H-NMR of 34



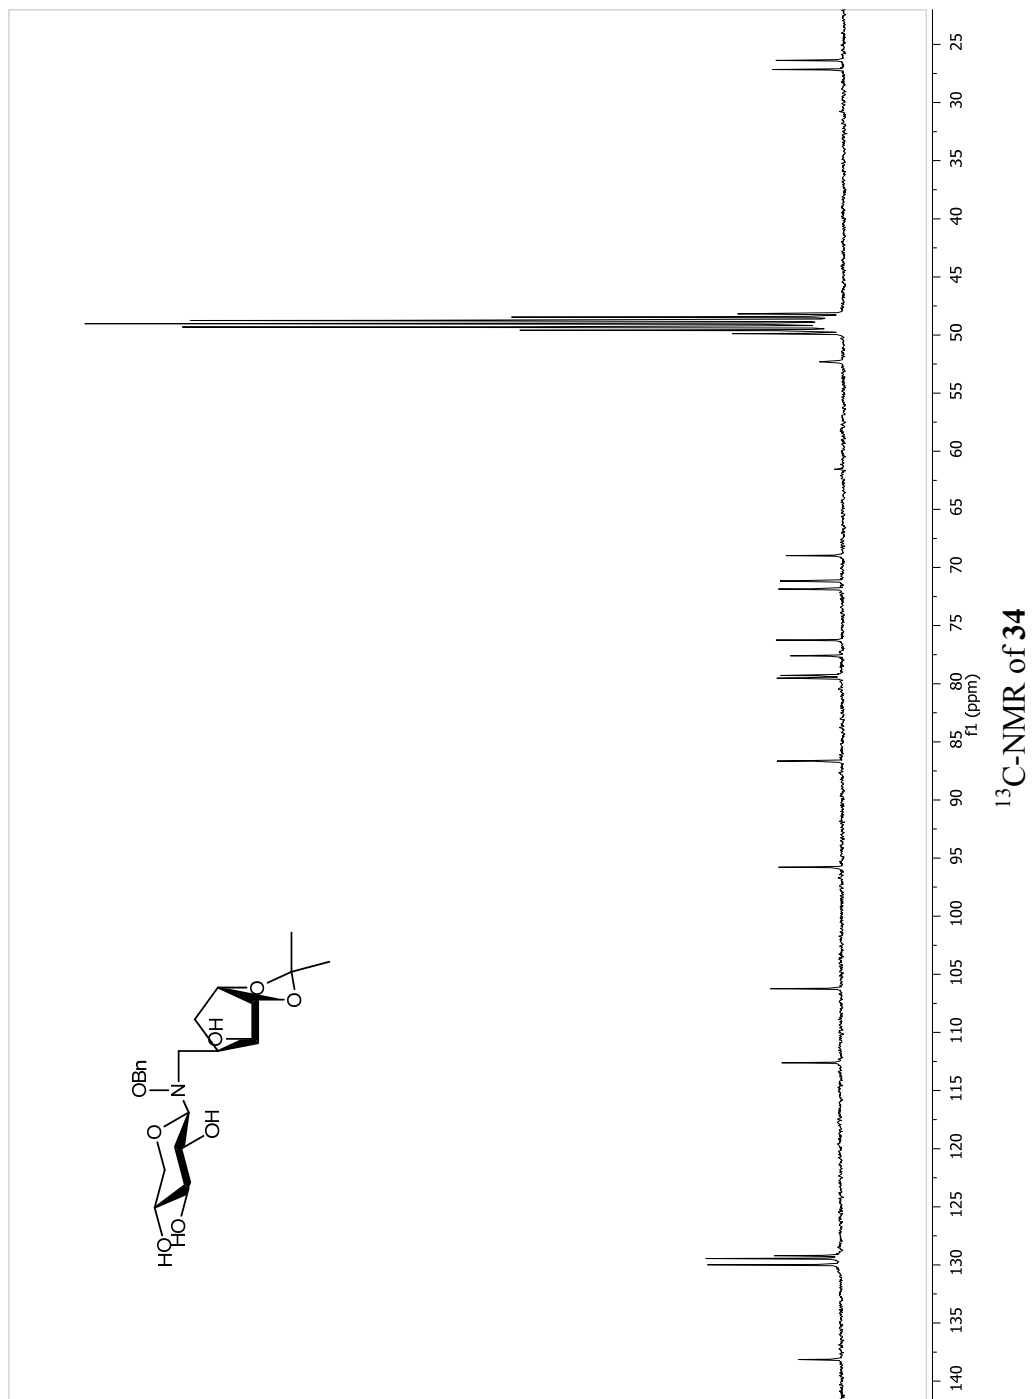

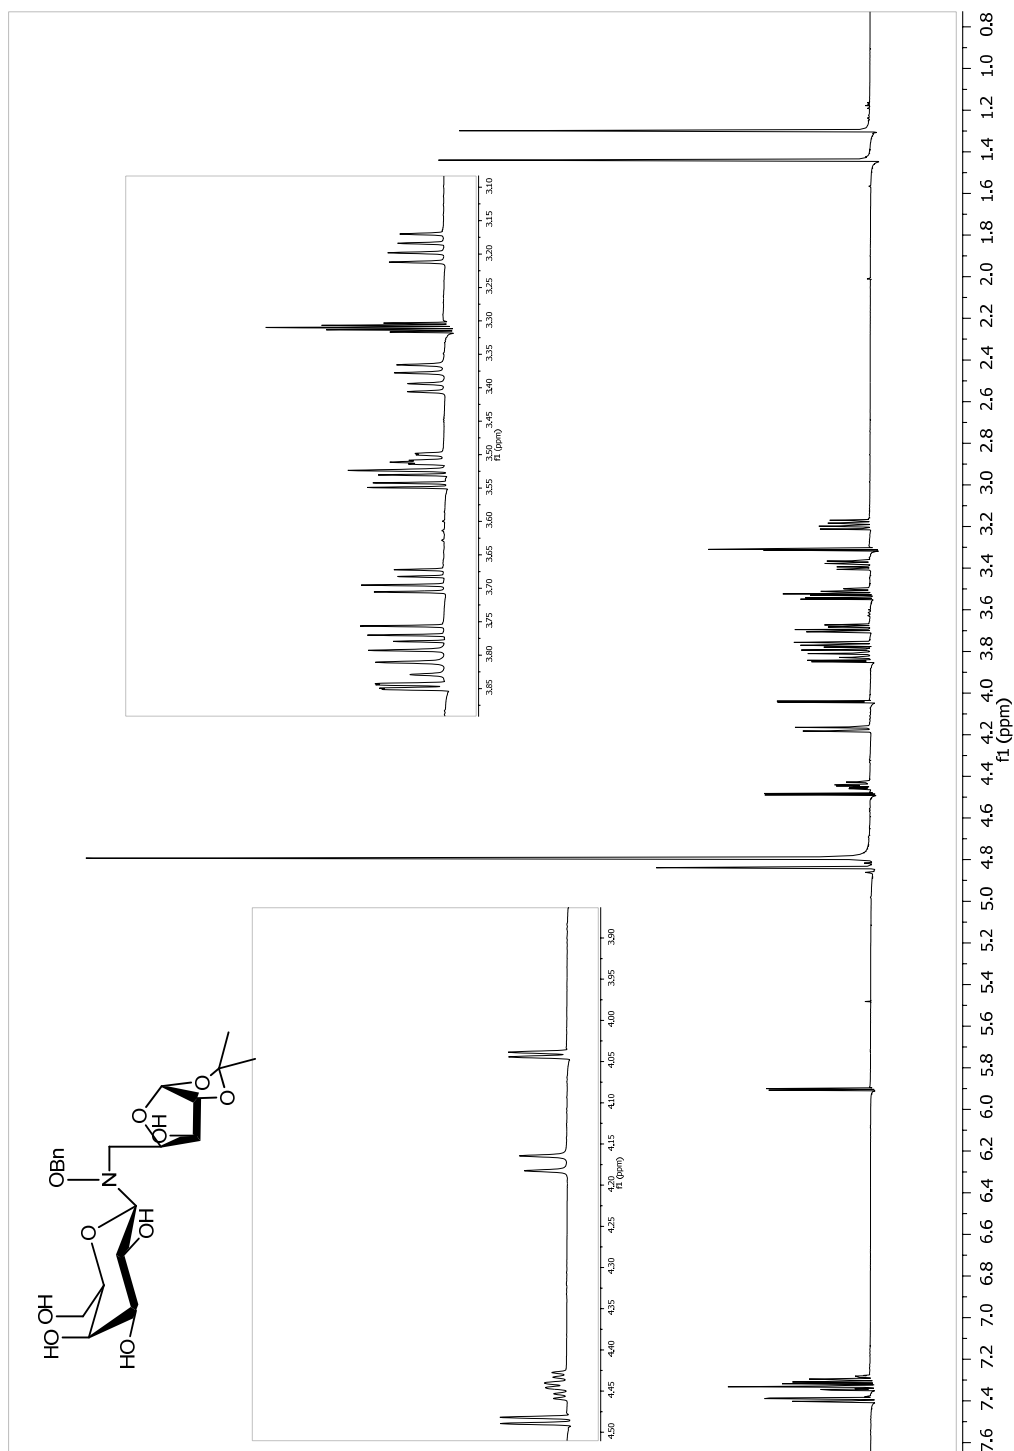

$^1\text{H-NMR}$  of **35**

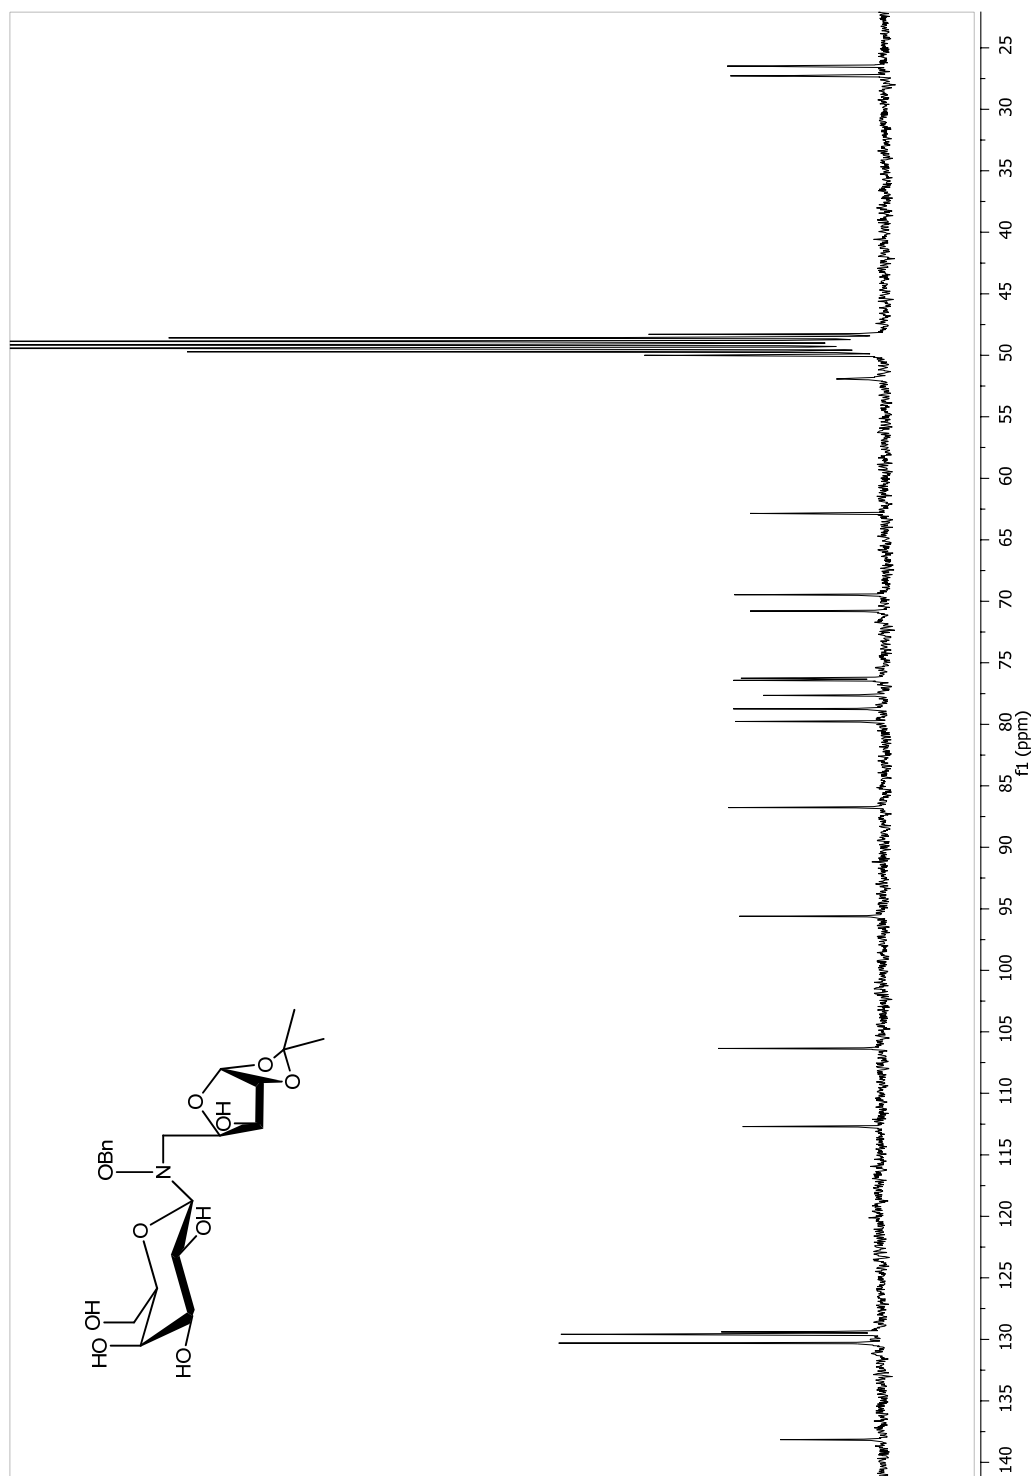

$^{13}\text{C}$ -NMR of **35**
